# Supplementary material for: An electrocatalytic mono-functionalization of alkenes towards alkenyl selenium sulfonates
Source: Royal Society of Chemistry journal article supplement (doi:10.1039/d4cc06246a), 2025-01-01

# **An electrocatalytic mono-functionalization of alkenes towards alkenyl selenium sulfonates**

Zhiheng Zhao <sup>a</sup>, Hongyan Yan <sup>a</sup>, Lijun Gu <sup>\*a</sup>

<sup>a</sup> State Key Laboratory of Green Pesticide, Key Laboratory of Green Pesticide and Agricultural Bioengineering, Ministry of Education, Center for R&D of Fine Chemicals of Guizhou University, Guizhou, Guiyang, 550025, P. R. China;

E-mail: [gulijun2005@sina.com](mailto:gulijun2005@sina.com).

# Supporting Information

## List of Contents

|                                                                                                      |            |
|------------------------------------------------------------------------------------------------------|------------|
| <b>1. Materials and equipment.....</b>                                                               | <b>S2</b>  |
| <b>2. Experimental procedure.....</b>                                                                | <b>S2</b>  |
| 2.1 General procedure for the synthesis of 3.....                                                    | S2         |
| 2.2 Optimization of reaction conditions.....                                                         | S3         |
| 2.3 Scale-up reaction procedure.....                                                                 | S5         |
| 2.4 General procedure for the synthesis of intermediate.....                                         | S5         |
| <b>3. Cyclic voltammetry experiments.....</b>                                                        | <b>S6</b>  |
| <b>4. Derivatization reactions of products.....</b>                                                  | <b>S6</b>  |
| 4.1 Synthesis of selenocarbamates with target compound 3ac.....                                      | S7         |
| 5.2 Deboronative selenylation of target compound 3aj.....                                            | S7         |
| <b>5. Mechanism studies.....</b>                                                                     | <b>S8</b>  |
| 5.1 Detection of by-product by high-resolution mass spectra.....                                     | S8         |
| 5.2 Radical trapping experiment with 1,1-diphenylethylene.....                                       | S8         |
| 5.3 Control experiment.....                                                                          | S9         |
| 5.4 Synthesis of diselenide 2a-I.....                                                                | S11        |
| 5.5 High-resolution mass spectra of reaction intermediates.....                                      | S12        |
| <b>6. Density functional theory calculations.....</b>                                                | <b>S13</b> |
| <b>7. Unsuccessful substrates.....</b>                                                               | <b>S19</b> |
| <b>8. Characterization data of products.....</b>                                                     | <b>S19</b> |
| <b>9. Reference.....</b>                                                                             | <b>S34</b> |
| <b>10. Copies of <sup>1</sup>H NMR, <sup>13</sup>C NMR, <sup>19</sup>F NMR and HRMS spectra.....</b> | <b>S34</b> |

## 1. Materials and equipment

Unless otherwise special indicated, all the reagents were purchased from commercial supplies unless otherwise stated. And all the solvents were used as received without further purification. The instrument for electrolysis was dual display potentiostat (HY3005B) (made in China, HYELEC, **Figure S1**), the Carbon rod anode ( $\text{\O} = 8 \text{ mm}$ ) and Carbon rod cathode ( $\text{\O} = 8 \text{ mm}$ ) were purchased from Shanghai Fanyue Electronic Technology Co., LTD. Thin layer chromatography (TLC) employed glass 0.20-0.25 mm silica gel plates (GF254). Flash chromatography columns were packed with 200-300 mesh silica gel in petroleum (bp. 60-90 °C). Gradient flash chromatography was conducted eluting with PE (petroleum)/EA (ethyl acetate), they are listed as volume/volume ratios. Melting points were measured on a capillary melting point apparatus and were uncorrected. NMR spectra were recorded on a Bruker Avance III spectrometer operating at 400 MHz ( $^1\text{H}$  NMR), 100 MHz ( $^{13}\text{C}$  NMR) and 376.8 MHz ( $^{19}\text{F}$  NMR). Chemical shifts were reported in ppm downfield. Coupling constants were quoted in Hz ( $J$ ). Multiplicity was indicated as follows: s (singlet), d (doublet), t (triplet), q (quartet), m (multiplet). High resolution mass spectra (HRMS) were measured using Thermo Scientific Q Exactive. Mass spectra (MS) were measured using electron ionization (EI) method by GC-MS.

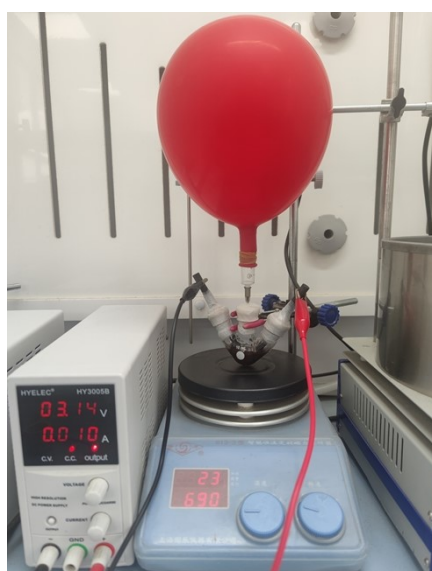

**Figure S1.** Assembling of setup for the reaction

## 2. Experimental procedure

### 2.1 General procedure for the synthesis of **3**

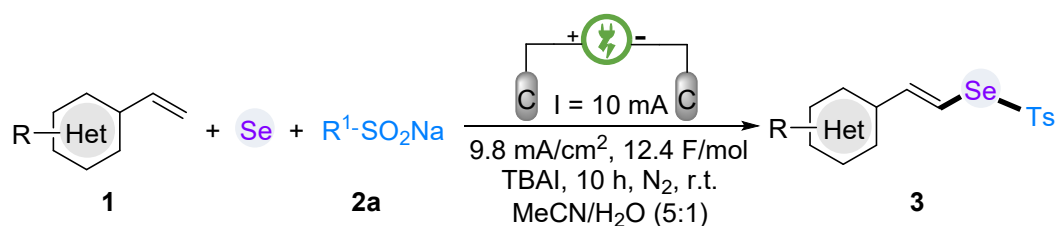

A 10-mL undivided three-necked bottle was equipped with a carbon rod anode ( $\varnothing = 8$  mm) and carbon rod cathode ( $\varnothing = 8$  mm) which was connected to a DC regulated power supply. Under N<sub>2</sub> atmosphere, **1** (0.3 mmol), Se (0.4 mmol), **2** (0.6 mmol) and TBAI (0.4 mmol) were dissolved in 5 mL MeCN and 1 mL H<sub>2</sub>O, and the cell was electrolyzed at a constant current of 10 mA ( $\sim 9.8$  mA/cm<sup>2</sup>), and the mixture was stirred for 10 h at environment temperature. The electrolysis was terminated when the starting materials were consumed as determined by TLC. Then the reaction mixture was diluted with 50 mL ethyl acetate, washed with a saturated solution of brine ( $2 \times 15$  mL), dried (Na<sub>2</sub>SO<sub>4</sub>), and concentrated in vacuum, and the resulting residue was purified by silica gel column chromatography (eluent: PE/EA) to afford the desired products.

## 2.2 Optimization of reaction conditions

**Table S1.** Screening of electrode materials <sup>a</sup>

| Entry | Variation from the standard conditions | Yield <sup>b</sup> (%) |
|-------|----------------------------------------|------------------------|
| 1     | None                                   | 80                     |
| 2     | C (+)   Mg (-)                         | 36                     |
| 3     | C (+)   Zn (-)                         | 32                     |
| 4     | C(+)   Ni-foam (-)                     | 61                     |
| 5     | C (+)   Pt (-)                         | 66                     |
| 6     | GF (+)   Mg (-)                        | 30                     |
| 7     | GF (+)   GF (-)                        | 59                     |
| 8     | GF (+)   Pt (-)                        | 57                     |
| 9     | Ni-foam (+)   Mg (-)                   | trace                  |
| 10    | Ni-foam (+)   Pt (-)                   | trace                  |
| 11    | Ni-foam (+)   C (-)                    | trace                  |
| 12    | Pt (+)   Mg (-)                        | 26                     |
| 13    | Pt (+)   C (-)                         | 70                     |
| 14    | Pt (+)   Ni-foam (-)                   | 46                     |



<sup>a</sup> Reaction conditions: Carbon rod anode ( $\varnothing = 8$  mm), Carbon rod cathode ( $\varnothing = 8$  mm), constant current = 10 mA, undivided cell, **1a** (0.3 mmol), **2a** (0.6 mmol), Se (0.4 mmol), TBAI (0.4 mmol), MeCN (5 mL), H<sub>2</sub>O (1 mL), Room temperature, N<sub>2</sub>, 10 h. <sup>b</sup> Isolated yield.

**Table S2.** Screening of electrolytes <sup>a</sup>

| Entry | Variation from the standard conditions                     | Yield <sup>b</sup> (%) |
|-------|------------------------------------------------------------|------------------------|
| 1     | None                                                       | 80                     |
| 2     | NaI instead of TBAI                                        | 63                     |
| 3     | KI instead of TBAI                                         | 66                     |
| 4     | I <sub>2</sub> instead of TBAI                             | trace                  |
| 5     | <i>n</i> -Bu <sub>4</sub> NBr instead of TBAI              | 37                     |
| 6     | NaBr instead of TBAI                                       | 45                     |
| 7     | NH <sub>4</sub> I instead of TBAI                          | 57                     |
| 8     | NH <sub>4</sub> Br instead of TBAI                         | 42                     |
| 9     | LiBr instead of TBAI                                       | 33                     |
| 10    | LiClO <sub>4</sub> instead of TBAI                         | trace                  |
| 11    | <i>n</i> -Bu <sub>4</sub> NBF <sub>4</sub> instead of TBAI | trace                  |

<sup>a</sup> Reaction conditions: Carbon rod anode ( $\varnothing = 8$  mm), Carbon rod cathode ( $\varnothing = 8$  mm), constant current = 10 mA, undivided cell, **1a** (0.3 mmol), **2a** (0.6 mmol), Se (0.4 mmol), TBAI (0.4 mmol), MeCN (5 mL), H<sub>2</sub>O (1 mL), Room temperature, N<sub>2</sub>, 10 h. <sup>b</sup> Isolated yield.

**Table S3.** Screening of solvents <sup>a</sup>

| Entry | Variation from the standard conditions                        | Yield <sup>b</sup> (%) |
|-------|---------------------------------------------------------------|------------------------|
| 1     | None                                                          | 80                     |
| 2     | CH <sub>2</sub> Cl <sub>2</sub> /H <sub>2</sub> O (5:1, 6 mL) | 37                     |
| 3     | DMSO/H <sub>2</sub> O (5:1, 6 mL)                             | 62                     |
| 4     | DMF/H <sub>2</sub> O (5:1, 6 mL)                              | 35                     |
| 5     | THF/H <sub>2</sub> O (5:1, 6 mL)                              | 43                     |
| 6     | EtOH/H <sub>2</sub> O (5:1, 6 mL)                             | trace                  |
| 7     | MeCN /H <sub>2</sub> O (3:1, 8 mL)                            | 73                     |
| 8     | MeCN /H <sub>2</sub> O (1:1, 6 mL)                            | 71                     |
| 9     | MeCN (6 mL)                                                   | 63                     |

<sup>a</sup> Reaction conditions: Carbon rod anode ( $\varnothing = 8$  mm), Carbon rod cathode ( $\varnothing = 8$  mm), constant current = 10 mA, undivided cell, **1a** (0.3 mmol), **2a** (0.6 mmol), Se (0.4 mmol),

TBAI (0.4 mmol), MeCN (5 mL), H<sub>2</sub>O (1 mL), Room temperature, N<sub>2</sub>, 10 h. <sup>b</sup> Isolated yield.

### 2.3 Scale-up reaction procedure

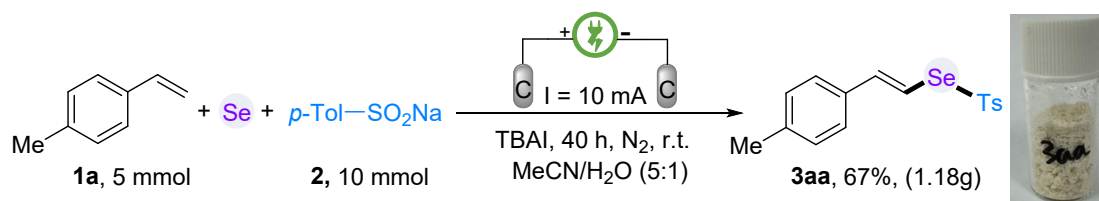

A 250-mL undivided three-necked bottle was equipped with a carbon rod anode ( $\varnothing = 8$  mm) and carbon rod cathode ( $\varnothing = 8$  mm) which was connected to a DC regulated power supply. Under N<sub>2</sub> atmosphere, 4-methylstyrene **1a** (5 mmol), Se (6 mmol), sodium *p*-tolylsulfinate **2a** (10 mmol) and TBAI (6 mmol) were dissolved in 50 mL MeCN and 10 mL H<sub>2</sub>O, the cell was electrolyzed at a constant current of 10 mA ( $\sim 9.8$  mA/cm<sup>2</sup>), and the mixture was stirred for 40 h at environment temperature. The electrolysis and irradiation were terminated when the starting materials were consumed as determined by TLC. Then the reaction mixture was diluted with 150 mL ethyl acetate, washed with a saturated solution of brine ( $2 \times 30$  mL), dried (Na<sub>2</sub>SO<sub>4</sub>), and concentrated in vacuum, and the resulting residue was purified by silica gel column chromatography (eluent: PE/EA = 5:1) to afford the desired product **3aa** (1.18 g, yield 67%).

### 2.4 General procedure for the synthesis of intermediate

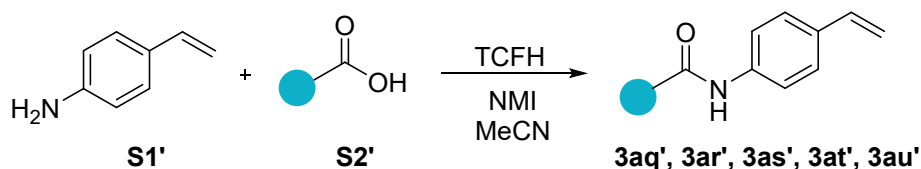

An oven dried 100 mL round-bottomed flask was charged with acid **S2'** (5 mmol, 1.0 equiv), 4-vinylaniline **S1'** (6.5 mmol, 1.3 equiv), N-methylimidazole (17.5 mmol, 3.5 equiv), and TCFH (6.0 mmol, 1.2 equiv) in MeCN (40 mL). Then the reaction mixture was stirred at room temperature for 22 h. The reaction was terminated when the starting materials were consumed as determined by TLC. The reaction mixture was diluted in 50 mL ethyl acetate, washed with saturated solution of brine (20.0 mL), saturated solution of NaHCO<sub>3</sub> (20.0 mL), brine (20.0 mL). dried (Na<sub>2</sub>SO<sub>4</sub>), and concentrated in vacuum, and the resulting residue was purified by silica gel column chromatography (PE/EA) to afford the desired product **3aq'**, **3ar'**,

**3as'**, **3at'** and **3au'**.

### 3. Cyclic voltammetry experiments

Cyclic voltammetry was performed in a three-electrode cell connected to a schlenk line at room temperature. The working electrode was a steady glassy carbon disk electrode, the counter electrode a platinum wire. The reference was an Ag/AgCl electrode submerged in saturated aqueous KCl solution. 5 mL of MeCN and 1 mL of H<sub>2</sub>O containing 0.1 M LiClO<sub>4</sub> were poured into the electrochemical cell in all experiments. The scan rate is 0.01 V/s, ranging from 0.0 V to 2.0 V.

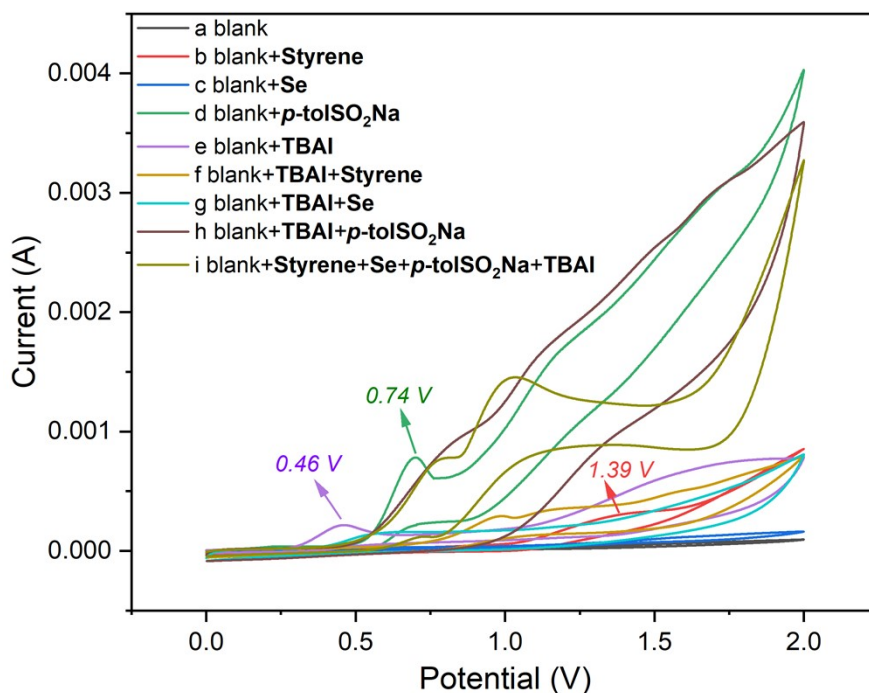

**Figure S2.** CV plotting convention (IUPAC)

In **Figure S2**, Cyclic voltammograms of 0.1 mol L<sup>-1</sup> of LiClO<sub>4</sub> in 5 mL of MeCN and 1 mL of H<sub>2</sub>O solution containing different compounds: (a) blank experiment; (b) Styrene (0.3 mmol); (c) Selenium (0.4 mmol); (d) Sodium *p*-tolylsulfinate (0.6 mmol); (e) TBAI (0.4 mmol); (f) TBAI (0.4 mmol), Styrene (0.3 mmol); (g) TBAI (0.4 mmol), Selenium (0.4 mmol); (h) TBAI (0.4 mmol), Sodium *p*-tolylsulfinate (0.6 mmol); (i) Styrene (0.3 mmol), Selenium (0.4 mmol), Sodium *p*-tolylsulfinate (0.6 mmol), TBAI (0.4 mmol); with a GC disk working electrode, Pt counter electrode, and Ag/AgCl reference electrode at 0.01 V/s scan rate.

### 4. Derivatization reactions of products

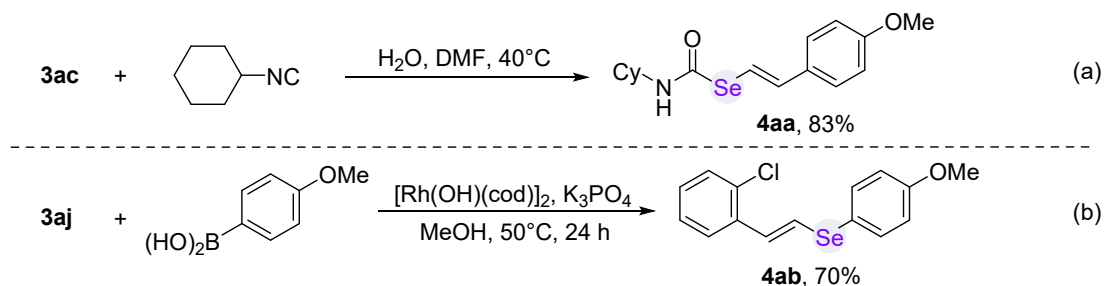

**Scheme S1.** Derivatization reactions of products.

#### 4.1 Synthesis of selenocarbamates **4aa**

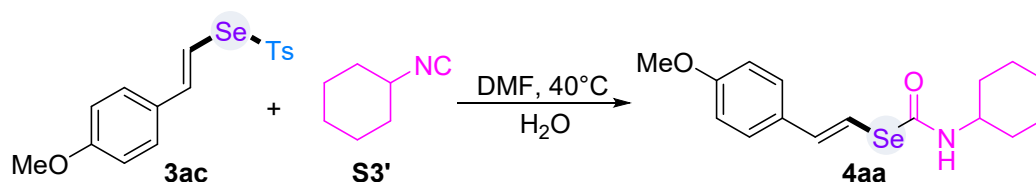

In an oven dried 10 mL schlenk tube with a magnetic stir bar, (*E*)-*Se*-(4-methoxystyryl) 4-methylbenzenesulfonoselenoate **3ac** (0.3 mmol, 1.0 equiv) was dissolved in DMF (2 mL). Isocyanocyclohexane **S3'** (0.6 mmol, 2.0 equiv) and H<sub>2</sub>O (3.0 mmol, 10 equiv) were added subsequently. The system was stirred at 40 °C under air. After 12 h, the crude reaction mixture was cooled to room temperature and diluted with ethyl acetate (50 mL). The organic phase was washed with water (20 mL × 3). The organic layer was dried over Na<sub>2</sub>SO<sub>4</sub>, filtered, and concentrated. The residue was purified by flash chromatography (eluent: PE/EA) to obtain the desired product **4aa**.

#### 4.2 Synthesis of **4ab**

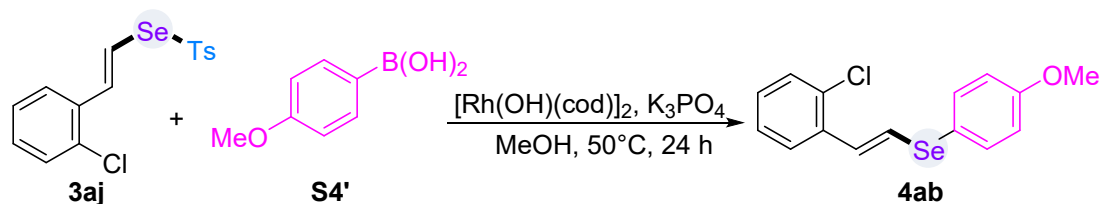

In an oven dried 10 mL schlenk tube with a magnetic stir bar, a mixture of (*E*)-*Se*-(2-chlorostyryl) 4-methylbenzenesulfonoselenoate **3aj** (0.25 mmol, 1.0 equiv), (4-methoxyphenyl)boronic acid **S4'** (0.5 mmol, 2.0 equiv), [Rh(OH)(cod)]<sub>2</sub> (2.9 mg, 6.3 μmol, 2.5 mol %), and tripotassium phosphate (0.5 mmol, 2.0 equiv) suspended in MeOH (2.5 mL) was stirred for 24 h at 50 °C. After cooling to room temperature, the mixture was filtered, and then the filtrate was concentrated under reduced pressure. To the residue was added ethyl acetate (20 mL) and the mixture was washed with

aqueous saturated solution of sodium bicarbonate (20 mL × 2) and brine (20 mL), and then dried (Na<sub>2</sub>SO<sub>4</sub>). After filtration, the filtrate was concentrated under reduced pressure. The residue was purified by flash chromatography (eluent: PE/EA) to obtain the desired product **4ab**.

## 5. Mechanism Studies

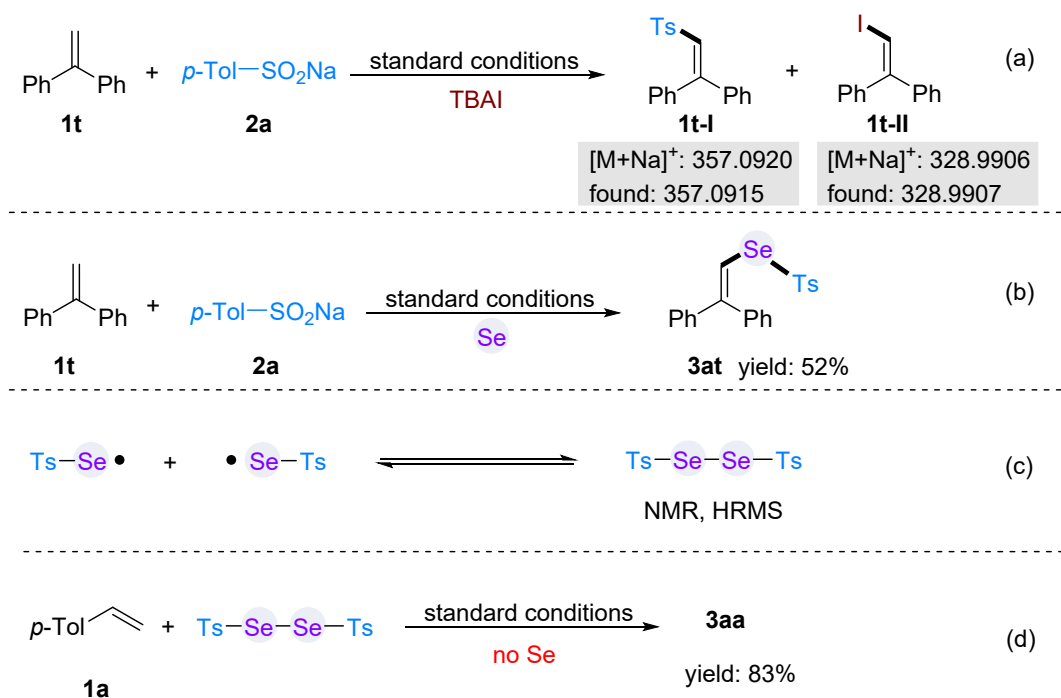

Scheme S2. Mechanism Studies.

### 5.1 Detection of by-product by high-resolution mass spectra

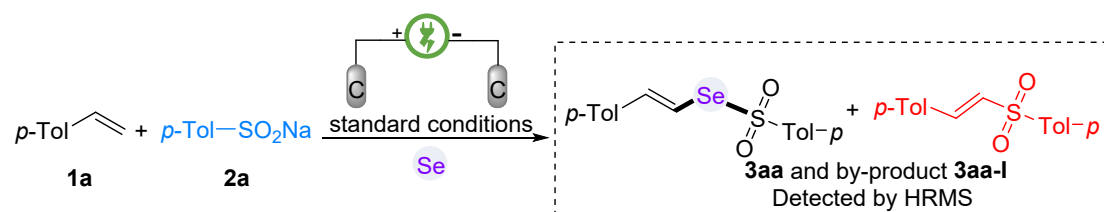

Reaction conditions: Carbon rod anode ( $\varnothing = 8$  mm), Carbon rod cathode ( $\varnothing = 8$  mm), constant current = 10 mA, undivided cell, **1a** (0.3 mmol), **2a** (0.6 mmol), Se (0.4 mmol), TBAI (0.4 mmol), MeCN (5 mL), H<sub>2</sub>O (1 mL), Room temperature, N<sub>2</sub>, 10 h. The corresponding reaction mixture was detected by HRMS. We detected the **3aa** and by-product **3aa-I** by HRMS analysis (Figures S3).

HRMS (ESI) calcd for C<sub>16</sub>H<sub>17</sub>O<sub>2</sub>S<sub>2</sub>Se [M+H]<sup>+</sup>: 353.0036, found: 353.0038.

HRMS (ESI) calcd for C<sub>16</sub>H<sub>17</sub>O<sub>2</sub>S [M+H]<sup>+</sup>: 273.0871, found: 273.0874.

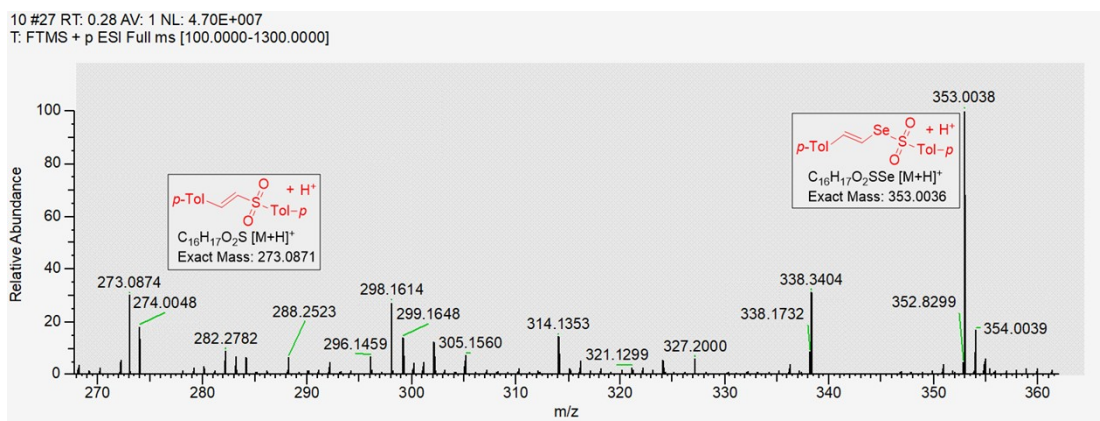

**Figure S3.** High-resolution mass spectra of reaction by-product.

## 5.2 Radical trapping experiment with 1,1-diphenylethylene

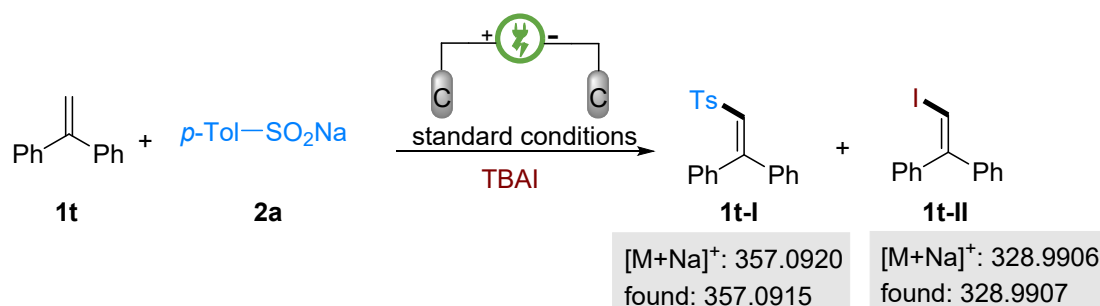

Reaction conditions: Carbon rod anode ( $\varnothing = 8$  mm), Carbon rod cathode ( $\varnothing = 8$  mm), constant current = 10 mA, undivided cell, **1t** (1.2 mmol), **2a** (0.6 mmol), TBAI (0.4 mmol), MeCN (5 mL), H<sub>2</sub>O (1 mL), Room temperature, N<sub>2</sub>, 10 h. The corresponding reaction mixture was detected by HRMS. We successfully detected the desired **1t-I** and **1t-II** by HRMS analysis (**Figures S4**).

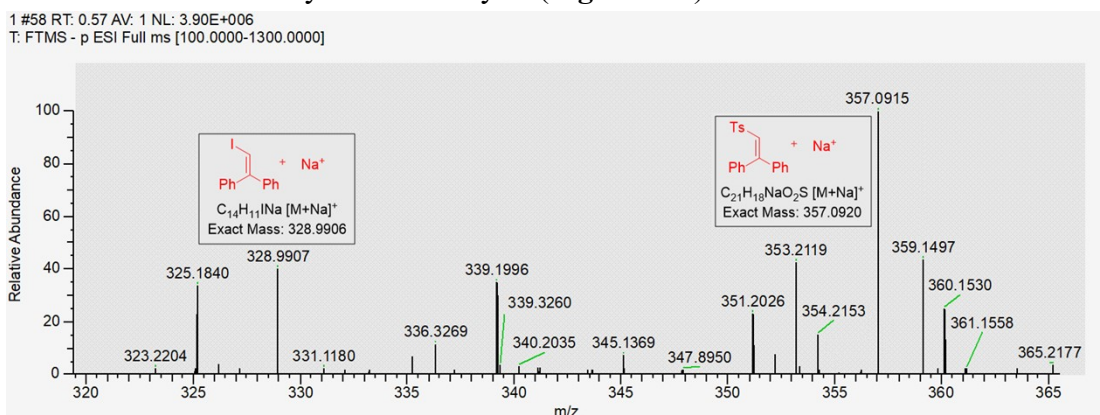

**Figure S4.** High-resolution mass spectra of 1,1-diphenylethylene adducts to reaction radicals.

## 5.3 Control experiment

### (1) Sulfur powder instead of Se powder





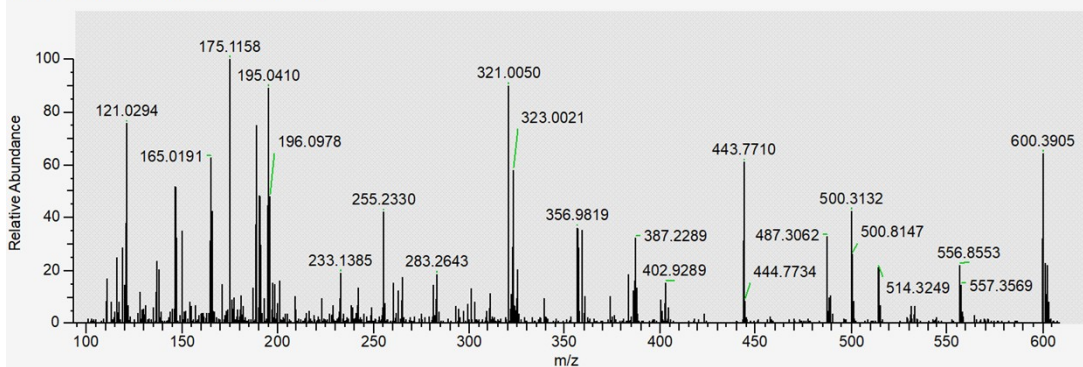

**Figure S5.** High-resolution mass spectra of reaction under air.

#### (4) Diphenylethylene as a free radical scavenger

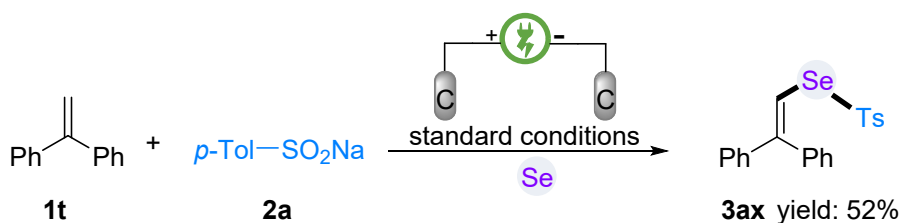

Reaction conditions: Carbon rod anode ( $\varnothing = 8$  mm), Carbon rod cathode ( $\varnothing = 8$  mm), constant current = 10 mA, undivided cell, **1t** (0.3 mmol), **2a** (0.6 mmol), Se (0.4 mmol), TBAI (0.4 mmol), MeCN (5 mL), H<sub>2</sub>O (1 mL), Room temperature, N<sub>2</sub>, 10 h.

#### (5) Performing the reaction with TsNHNH<sub>2</sub>

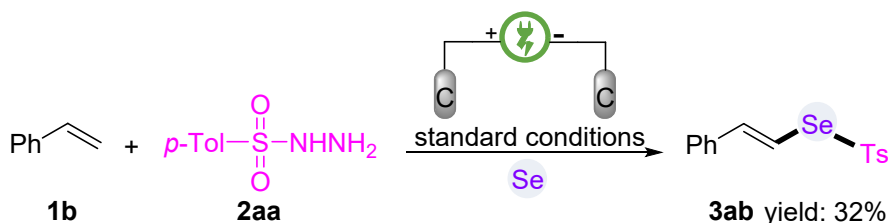

Reaction conditions: Carbon rod anode ( $\varnothing = 8$  mm), Carbon rod cathode ( $\varnothing = 8$  mm), constant current = 10 mA, undivided cell, **1b** (0.3 mmol), **2aa** (0.6 mmol), Se (0.4 mmol), TBAI (0.4 mmol), MeCN (5 mL), H<sub>2</sub>O (1 mL), Room temperature, N<sub>2</sub>, 10 h. The final product **3ab** was isolated in only 32% yield.

#### 5.4 Synthesis of diselenide 2a-I

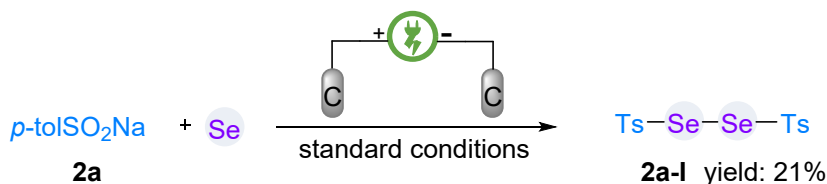

Reaction conditions: Carbon rod anode ( $\varnothing = 8$  mm), Carbon rod cathode ( $\varnothing = 8$  mm), constant current = 10 mA, undivided cell, **2a** (0.6 mmol), Se (0.4 mmol), TBAI (0.4 mmol), MeCN (5 mL), H<sub>2</sub>O (1 mL), Room temperature, N<sub>2</sub>, 10 h.



mm), constant current = 10 mA, undivided cell, **2a** (0.6 mmol), Se (0.4 mmol), TBAI (0.4 mmol), MeCN (5 mL), H<sub>2</sub>O (1 mL), Room temperature, N<sub>2</sub>, 10 h. Overall Yield: 21% (39.5 mg). Nature: pale yellow oil. Purification of the product was performed by silica gel column chromatography (eluent: PE/EA = 12:1). <sup>1</sup>H NMR (400 MHz, DMSO-*d*<sub>6</sub>) δ (ppm) 7.82 (d, *J* = 8.0 Hz, 4H), 7.40 (d, *J* = 8.0 Hz, 4H), 2.33 (s, 6H); <sup>13</sup>C{<sup>1</sup>H} NMR (100 MHz, DMSO-*d*<sub>6</sub>) δ (ppm) 144.1, 137.2, 130.3, 128.4, 21.7. HRMS (ESI) *m/z*: [M+H]<sup>+</sup> Calcd for: C<sub>14</sub>H<sub>15</sub>O<sub>4</sub>S<sub>2</sub>Se<sub>2</sub><sup>+</sup> 470.8664; Found: 470.8661.

### 5.5 Diselenide 2a-I used as the Se-source

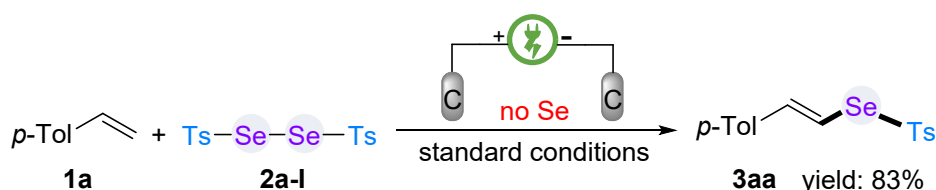

Reaction conditions: Carbon rod anode (Ø = 8 mm), Carbon rod cathode (Ø = 8 mm), constant current = 10 mA, undivided cell, **1a** (0.3 mmol), **2a-I** (0.4 mmol), TBAI (0.4 mmol), MeCN (5 mL), H<sub>2</sub>O (1 mL), Room temperature, N<sub>2</sub>, 10 h. The desired product **3aa** (83%) was produced. The diselenide was the real selenium source in the reaction.

### 5.6 High-resolution mass spectra of reaction intermediates

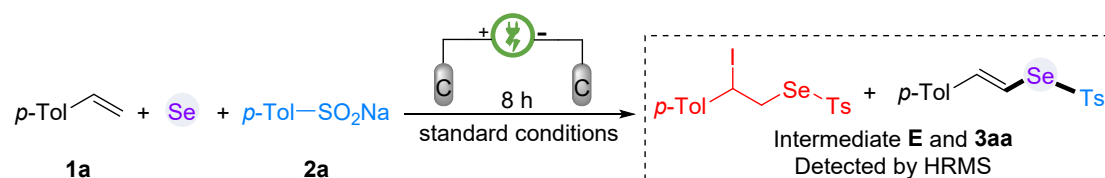

Reaction conditions: Carbon rod anode (Ø = 8 mm), Carbon rod cathode (Ø = 8 mm), constant current = 10 mA, undivided cell, **1a** (0.3 mmol), **2a** (0.6 mmol), Se (0.4 mmol), TBAI (0.4 mmol), MeCN (5 mL), H<sub>2</sub>O (1 mL), Room temperature, N<sub>2</sub>, 8 h. The corresponding reaction mixture was detected by HRMS. We successfully detected the desired intermediate **E** and **3aa** by HRMS analysis (**Figures S6**).

HRMS (ESI) calcd for C<sub>16</sub>H<sub>17</sub>O<sub>2</sub>SSe [M+H]<sup>+</sup>: 353.0036, found: 353.0038.

HRMS (ESI) calcd for C<sub>16</sub>H<sub>18</sub>IO<sub>2</sub>SSe [M+H]<sup>+</sup>: 480.9159, found: 480.9157.

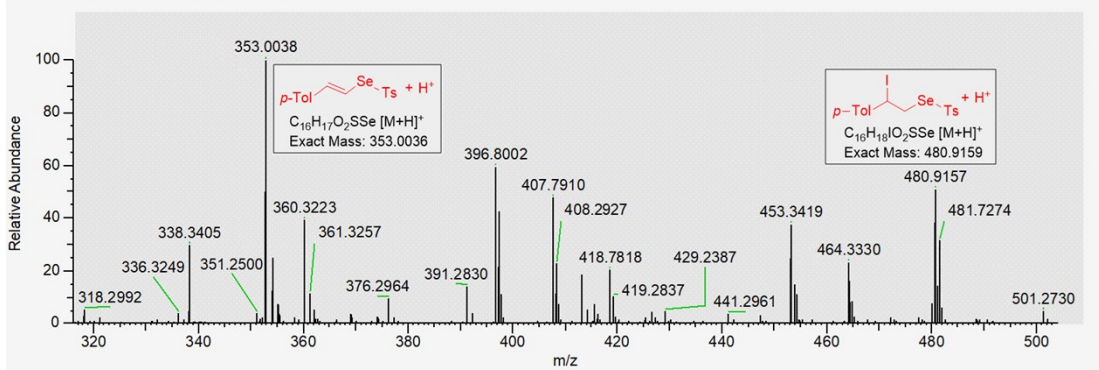

Figure S6. High-resolution mass spectra of reaction intermediates.

## 6. Density functional theory (DFT) calculations

### 6.1.1 DFT modelling calculations for elimination reaction

All structures were optimized at the level of M06-2X/def2-SVP<sup>1</sup> with solvent acetonitrile in the PCM solvent model. Vibrational analyses were performed on all optimized geometries, to ensure that the optimized structures corresponded to local minima<sup>2</sup>. Unless otherwise specified, the solution-phase Gibbs free energy was used in the discussion. The Gaussian 16 suite of programs<sup>3</sup> was used throughout.

Table S4. Calculation results

| A                     | B           | C               | D                       | E         |
|-----------------------|-------------|-----------------|-------------------------|-----------|
|                       | G           | Corrected value | Calculated value (A.U.) | kcal/mol  |
| Product <b>3aa</b>    | -788.732474 | 0.220539        | -788.511935             |           |
| Intermediate <b>E</b> | -800.728631 | 0.228618        | -800.500013             |           |
| HI                    | -11.990771  | -0.015223       | -12.005994              |           |
| $\Delta G$            |             |                 | -0.017916               | -11.24229 |

### 6.1.2 Cartesian coordinates of stationary points

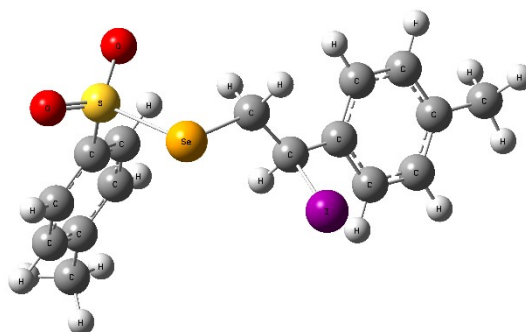

#### Intermediate E

|                                          |                             |
|------------------------------------------|-----------------------------|
| Zero-point correction=                   | 0.291027 (Hartree/Particle) |
| Thermal correction to Energy=            | 0.314367                    |
| Thermal correction to Enthalpy=          | 0.315311                    |
| Thermal correction to Gibbs Free Energy= | 0.228618                    |

Sum of electronic and zero-point Energies= -800.666222  
 Sum of electronic and thermal Energies= -800.642882  
 Sum of electronic and thermal Enthalpies= -800.641938  
 Sum of electronic and thermal Free Energies= -800.728631

| Center<br>Number | Atomic<br>Number | Atomic<br>Type | Coordinates (Angstroms) |           |           |
|------------------|------------------|----------------|-------------------------|-----------|-----------|
|                  |                  |                | X                       | Y         | Z         |
| 1                | 6                | 0              | 5.083032                | 2.520517  | -0.250542 |
| 2                | 6                | 0              | 4.177257                | 2.496231  | -1.318055 |
| 3                | 6                | 0              | 3.087364                | 1.622326  | -1.319309 |
| 4                | 6                | 0              | 2.865646                | 0.745067  | -0.248421 |
| 5                | 6                | 0              | 3.778075                | 0.761002  | 0.821346  |
| 6                | 6                | 0              | 4.862175                | 1.633698  | 0.817954  |
| 7                | 1                | 0              | 4.322808                | 3.167703  | -2.161309 |
| 8                | 1                | 0              | 2.401077                | 1.624022  | -2.163319 |
| 9                | 1                | 0              | 3.652358                | 0.074461  | 1.654221  |
| 10               | 1                | 0              | 5.554603                | 1.624971  | 1.657292  |
| 11               | 6                | 0              | 6.259138                | 3.468925  | -0.235520 |
| 12               | 1                | 0              | 6.345037                | 4.015345  | -1.180418 |
| 13               | 1                | 0              | 6.161512                | 4.208494  | 0.569971  |
| 14               | 1                | 0              | 7.201946                | 2.933249  | -0.069144 |
| 15               | 6                | 0              | 1.663317                | -0.145847 | -0.267792 |
| 16               | 6                | 0              | 0.823675                | -0.102568 | 0.998079  |
| 17               | 1                | 0              | 0.456376                | 0.923392  | 1.152530  |
| 18               | 16               | 0              | -2.329652               | 0.743532  | 1.544802  |
| 19               | 8                | 0              | -2.958030               | 0.482925  | 2.942586  |
| 20               | 8                | 0              | -1.454468               | 2.011326  | 1.279393  |
| 21               | 6                | 0              | -3.716251               | 0.741871  | 0.304012  |
| 22               | 6                | 0              | -3.516641               | 1.364613  | -0.919626 |
| 23               | 6                | 0              | -4.907192               | 0.115129  | 0.650652  |
| 24               | 6                | 0              | -4.570378               | 1.358421  | -1.836940 |
| 25               | 1                | 0              | -2.574819               | 1.855145  | -1.142955 |
| 26               | 6                | 0              | -5.943528               | 0.119429  | -0.283978 |
| 27               | 1                | 0              | -5.022000               | -0.345587 | 1.626547  |
| 28               | 6                | 0              | -5.792694               | 0.737551  | -1.536899 |
| 29               | 1                | 0              | -4.438124               | 1.847614  | -2.798778 |
| 30               | 1                | 0              | -6.886048               | -0.361030 | -0.031467 |
| 31               | 6                | 0              | -6.930599               | 0.736449  | -2.530937 |
| 32               | 1                | 0              | -7.278807               | -0.283482 | -2.734336 |
| 33               | 1                | 0              | -7.789683               | 1.301290  | -2.147164 |
| 34               | 1                | 0              | -6.632722               | 1.186922  | -3.482858 |
| 35               | 34               | 0              | -0.825776               | -1.233067 | 0.868909  |
| 36               | 1                | 0              | 1.374523                | -0.423159 | 1.882507  |

|    |    |   |          |           |           |
|----|----|---|----------|-----------|-----------|
| 37 | 1  | 0 | 1.046231 | 0.053880  | -1.143388 |
| 38 | 53 | 0 | 2.253248 | -2.308799 | -0.652597 |

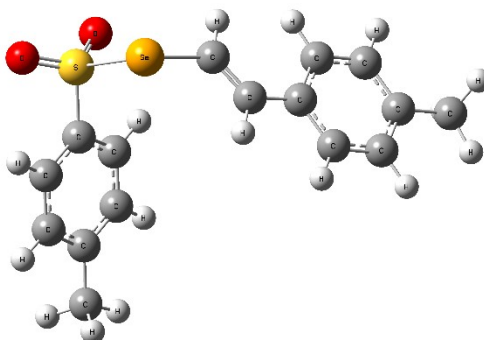

**Product 3aa**

|                                              |                             |
|----------------------------------------------|-----------------------------|
| Zero-point correction=                       | 0.277695 (Hartree/Particle) |
| Thermal correction to Energy=                | 0.299087                    |
| Thermal correction to Enthalpy=              | 0.300032                    |
| Thermal correction to Gibbs Free Energy=     | 0.220539                    |
| Sum of electronic and zero-point Energies=   | -788.675318                 |
| Sum of electronic and thermal Energies=      | -788.653926                 |
| Sum of electronic and thermal Enthalpies=    | -788.652981                 |
| Sum of electronic and thermal Free Energies= | -788.732474                 |

| Center Number | Atomic Number | Atomic Type | Coordinates (Angstroms) |           |           |
|---------------|---------------|-------------|-------------------------|-----------|-----------|
|               |               |             | X                       | Y         | Z         |
| 1             | 6             | 0           | 5.414740                | 0.979505  | 0.274503  |
| 2             | 6             | 0           | 4.718161                | 1.454255  | -0.844754 |
| 3             | 6             | 0           | 3.477739                | 0.922476  | -1.197182 |
| 4             | 6             | 0           | 2.885711                | -0.109340 | -0.444413 |
| 5             | 6             | 0           | 3.586935                | -0.583245 | 0.685932  |
| 6             | 6             | 0           | 4.821376                | -0.048637 | 1.032097  |
| 7             | 1             | 0           | 5.150473                | 2.249147  | -1.448267 |
| 8             | 1             | 0           | 2.957869                | 1.308014  | -2.071604 |
| 9             | 1             | 0           | 3.159341                | -1.369195 | 1.301200  |
| 10            | 1             | 0           | 5.338890                | -0.430582 | 1.909735  |
| 11            | 6             | 0           | 6.758542                | 1.545642  | 0.666317  |
| 12            | 1             | 0           | 7.070299                | 2.345835  | -0.012598 |
| 13            | 1             | 0           | 6.735276                | 1.956989  | 1.683540  |
| 14            | 1             | 0           | 7.535449                | 0.770417  | 0.650999  |
| 15            | 6             | 0           | 1.583825                | -0.626858 | -0.862235 |
| 16            | 1             | 0           | 1.125722                | -0.108390 | -1.704191 |
| 17            | 6             | 0           | 0.917477                | -1.679030 | -0.329164 |
| 18            | 1             | 0           | 1.306063                | -2.249280 | 0.508025  |
| 19            | 16            | 0           | -2.180499               | -1.325463 | 0.929402  |

|    |    |   |           |           |           |
|----|----|---|-----------|-----------|-----------|
| 20 | 8  | 0 | -3.521509 | -2.118136 | 0.955105  |
| 21 | 8  | 0 | -1.226148 | -1.270109 | 2.162076  |
| 22 | 6  | 0 | -2.583093 | 0.436580  | 0.480541  |
| 23 | 6  | 0 | -1.724416 | 1.442381  | 0.902184  |
| 24 | 6  | 0 | -3.730543 | 0.686071  | -0.264200 |
| 25 | 6  | 0 | -2.037480 | 2.760582  | 0.556374  |
| 26 | 1  | 0 | -0.849854 | 1.202756  | 1.498084  |
| 27 | 6  | 0 | -4.022349 | 2.008923  | -0.595590 |
| 28 | 1  | 0 | -4.383074 | -0.129863 | -0.558410 |
| 29 | 6  | 0 | -3.183525 | 3.063392  | -0.193291 |
| 30 | 1  | 0 | -1.381459 | 3.563788  | 0.883347  |
| 31 | 1  | 0 | -4.920227 | 2.226037  | -1.169979 |
| 32 | 6  | 0 | -3.524916 | 4.490546  | -0.554069 |
| 33 | 1  | 0 | -3.690438 | 4.599898  | -1.632748 |
| 34 | 1  | 0 | -4.445254 | 4.814602  | -0.051326 |
| 35 | 1  | 0 | -2.726040 | 5.180129  | -0.263540 |
| 36 | 34 | 0 | -0.743027 | -2.296364 | -1.035543 |

-----

HI

|                                              |                             |
|----------------------------------------------|-----------------------------|
| Zero-point correction=                       | 0.004936 (Hartree/Particle) |
| Thermal correction to Energy=                | 0.007297                    |
| Thermal correction to Enthalpy=              | 0.008241                    |
| Thermal correction to Gibbs Free Energy=     | -0.015223                   |
| Sum of electronic and zero-point Energies=   | -11.970612                  |
| Sum of electronic and thermal Energies=      | -11.968251                  |
| Sum of electronic and thermal Enthalpies=    | -11.967307                  |
| Sum of electronic and thermal Free Energies= | -11.990771                  |

-----

| Center Number | Atomic Number | Atomic Type | Coordinates (Angstroms) |          |           |
|---------------|---------------|-------------|-------------------------|----------|-----------|
|               |               |             | X                       | Y        | Z         |
| 1             | 53            | 0           | 0.000000                | 0.000000 | 0.030311  |
| 2             | 1             | 0           | 0.000000                | 0.000000 | -1.606460 |

-----

The calculations revealed that intermediate **E** undergoes elimination reaction smoothly to deliver the desired product **3aa**, in a highly exergonic transformation ( $\Delta G = 11.24$  kcal/mol from intermediate **E**)

### 6.2.1 DFT modelling calculations for the configuration of product **3aa**

Density functional theoretical modelling calculations were performed to shine light on the configuration of product **3aa**. The calculations revealed that product (*E*)-**3aa** is more stable than (*Z*)-**3aa** (~22 kJ mol<sup>-1</sup>).  $G_E = -788.472044$  A.U.,  $G_Z = -788.463512$

A.U.,  $\Delta G = 0.008532$  A.U.

## 6.2.2 Cartesian coordinates of stationary points

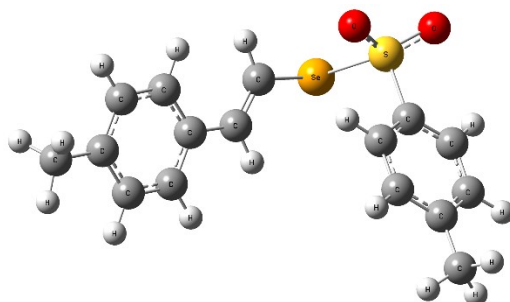

### (E)-3aa

Thermal correction to Gibbs Free Energy= 0.220658  
Sum of electronic and zero-point Energies= -788.635090  
Sum of electronic and thermal Energies= -788.613690  
Sum of electronic and thermal Enthalpies= -788.612746  
Sum of electronic and thermal Free Energies= -788.692702

---

| Center Number | Atomic Number | Atomic Type | Coordinates (Angstroms) |           |           |
|---------------|---------------|-------------|-------------------------|-----------|-----------|
|               |               |             | X                       | Y         | Z         |
| 1             | 6             | 0           | 5.383551                | 0.943503  | 0.279883  |
| 2             | 6             | 0           | 4.660340                | 1.466222  | -0.798579 |
| 3             | 6             | 0           | 3.423413                | 0.935366  | -1.156696 |
| 4             | 6             | 0           | 2.860069                | -0.141838 | -0.449108 |
| 5             | 6             | 0           | 3.590999                | -0.667536 | 0.637136  |
| 6             | 6             | 0           | 4.821613                | -0.132921 | 0.990013  |
| 7             | 1             | 0           | 5.070690                | 2.298753  | -1.364914 |
| 8             | 1             | 0           | 2.880494                | 1.358721  | -1.998579 |
| 9             | 1             | 0           | 3.189645                | -1.497834 | 1.209935  |
| 10            | 1             | 0           | 5.363374                | -0.555194 | 1.833349  |
| 11            | 6             | 0           | 6.727761                | 1.506054  | 0.673325  |
| 12            | 1             | 0           | 6.992757                | 2.375680  | 0.064234  |
| 13            | 1             | 0           | 6.737924                | 1.815569  | 1.725677  |
| 14            | 1             | 0           | 7.522109                | 0.758450  | 0.552391  |
| 15            | 6             | 0           | 1.554774                | -0.649570 | -0.865996 |
| 16            | 1             | 0           | 1.105097                | -0.131034 | -1.711653 |
| 17            | 6             | 0           | 0.872971                | -1.685080 | -0.325779 |
| 18            | 1             | 0           | 1.240739                | -2.250133 | 0.523278  |
| 19            | 34            | 0           | -0.795247               | -2.288294 | -1.053138 |
| 20            | 16            | 0           | -2.191175               | -1.314905 | 0.939308  |
| 21            | 8             | 0           | -3.545791               | -2.066594 | 0.985179  |
| 22            | 8             | 0           | -1.213753               | -1.277647 | 2.144993  |
| 23            | 6             | 0           | -2.553096               | 0.454542  | 0.491731  |

|    |   |   |           |           |           |
|----|---|---|-----------|-----------|-----------|
| 24 | 6 | 0 | -1.638543 | 1.431212  | 0.860543  |
| 25 | 6 | 0 | -3.720245 | 0.736334  | -0.205158 |
| 26 | 6 | 0 | -1.915406 | 2.752652  | 0.508211  |
| 27 | 1 | 0 | -0.745992 | 1.162126  | 1.414648  |
| 28 | 6 | 0 | -3.975687 | 2.063939  | -0.544513 |
| 29 | 1 | 0 | -4.410474 | -0.060719 | -0.461152 |
| 30 | 6 | 0 | -3.081689 | 3.088231  | -0.194693 |
| 31 | 1 | 0 | -1.215313 | 3.535462  | 0.789272  |
| 32 | 1 | 0 | -4.886175 | 2.308830  | -1.085842 |
| 33 | 6 | 0 | -3.386693 | 4.525690  | -0.544133 |
| 34 | 1 | 0 | -3.902155 | 4.603558  | -1.507231 |
| 35 | 1 | 0 | -4.039377 | 4.982679  | 0.211437  |
| 36 | 1 | 0 | -2.474597 | 5.128681  | -0.595585 |

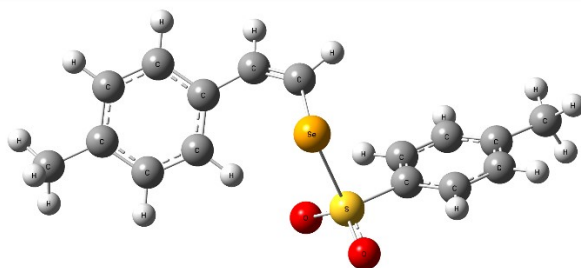

**(Z)-3aa**

|                                              |             |
|----------------------------------------------|-------------|
| Thermal correction to Gibbs Free Energy=     | 0.222726    |
| Sum of electronic and zero-point Energies=   | -788.630418 |
| Sum of electronic and thermal Energies=      | -788.609317 |
| Sum of electronic and thermal Enthalpies=    | -788.608372 |
| Sum of electronic and thermal Free Energies= | -788.686238 |

| Center Number | Atomic Number | Atomic Type | Coordinates (Angstroms) |           |           |
|---------------|---------------|-------------|-------------------------|-----------|-----------|
|               |               |             | X                       | Y         | Z         |
| 1             | 6             | 0           | -5.184901               | 0.354474  | -0.823103 |
| 2             | 6             | 0           | -5.153794               | 1.405721  | 0.104452  |
| 3             | 6             | 0           | -3.965598               | 1.771688  | 0.726659  |
| 4             | 6             | 0           | -2.765246               | 1.078459  | 0.470383  |
| 5             | 6             | 0           | -2.788756               | 0.043571  | -0.485977 |
| 6             | 6             | 0           | -3.979861               | -0.303770 | -1.113661 |
| 7             | 1             | 0           | -6.068571               | 1.947816  | 0.332174  |
| 8             | 1             | 0           | -3.964222               | 2.593164  | 1.439600  |
| 9             | 1             | 0           | -1.868061               | -0.445404 | -0.780758 |
| 10            | 1             | 0           | -3.969880               | -1.093914 | -1.860673 |
| 11            | 6             | 0           | -6.473710               | -0.058253 | -1.491570 |
| 12            | 1             | 0           | -7.215381               | 0.746874  | -1.468742 |
| 13            | 1             | 0           | -6.309795               | -0.342562 | -2.536774 |





2H), 7.33 (d,  $J = 8.0$  Hz, 2H), 7.08 (d,  $J = 8.0$  Hz, 2H), 6.64 (dd,  $J = 18.0$  Hz, 11.2 Hz, 1H), 5.71 (d,  $J = 17.6$  Hz, 1H), 5.14 (d,  $J = 11.6$  Hz, 1H), 3.84 (q,  $J = 7.2$  Hz, 1H), 2.37 (d,  $J = 7.2$  Hz, 2H), 1.82-1.72 (m, 1H), 1.43 (d,  $J = 7.2$  Hz, 3H), 0.82 (d,  $J = 6.8$  Hz, 6H);  $^{13}\text{C}\{^1\text{H}\}$  NMR (100 MHz, DMSO- $d_6$ )  $\delta$  (ppm) 172.5, 139.6, 139.2, 139.1, 136.2, 132.2, 129.0, 127.1, 126.6, 119.2, 112.6, 45.7, 44.3, 29.7, 22.2, 18.8.

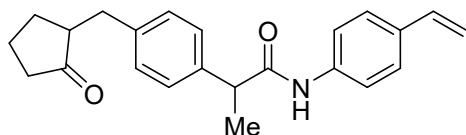

### 2-(4-((2-oxocyclopentyl)methyl)phenyl)-*N*-(4-vinylphenyl)propanamide (3ar')

Overall Yield: 85% (1475.6 mg). Nature: pale yellow solid. Purification of the product was performed by silica gel column chromatography (eluent: PE/EA = 4:1).

$^1\text{H}$  NMR (400 MHz, DMSO- $d_6$ )  $\delta$  (ppm) 10.15 (s, 1H), 7.64 (d,  $J = 8.4$  Hz, 2H), 7.38 (d,  $J = 8.8$  Hz, 2H), 7.33 (d,  $J = 8.4$  Hz, 2H), 7.13 (d,  $J = 8.4$  Hz, 2H), 6.64 (dd,  $J = 17.6$  Hz, 10.8 Hz, 1H), 5.70 (dd,  $J = 17.6$  Hz, 0.8 Hz, 1H), 5.14 (d,  $J = 11.6$  Hz, 1H), 3.83 (q,  $J = 6.8$  Hz, 1H), 2.95 (dd,  $J = 13.6$  Hz, 4.0 Hz, 1H), 2.43-2.37 (m, 1H), 2.35-2.27 (m, 1H), 2.23-2.16 (m, 1H), 2.06-1.99 (m, 1H), 1.91-1.76 (m, 2H), 1.66-1.57 (m, 1H), 1.47-1.37 (m, 4H);  $^{13}\text{C}\{^1\text{H}\}$  NMR (100 MHz, DMSO- $d_6$ )  $\delta$  (ppm) 219.3, 172.4, 139.5, 139.1, 138.6, 136.2, 132.2, 128.8, 127.3, 126.6, 119.2, 112.6, 50.1, 45.8, 37.6, 34.7, 28.8, 20.1, 18.7.

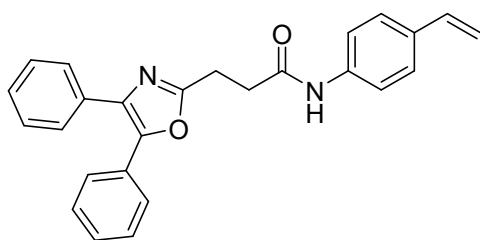

### 3-(4,5-diphenyloxazol-2-yl)-*N*-(4-vinylphenyl)propanamide (3as')

Overall Yield: 87% (1714.6 mg). Nature: white solid. Purification of the product was performed by silica gel column chromatography (eluent: PE/EA = 3:1).

$^1\text{H}$  NMR (400 MHz, DMSO- $d_6$ )  $\delta$  (ppm) 10.24 (s, 1H), 7.66 (d,  $J = 8.4$  Hz, 2H), 7.57 (d,  $J = 7.2$  Hz, 2H), 7.50 (d,  $J = 6.8$  Hz, 2H), 7.41-7.29 (m, 8H), 6.64 (dd,  $J = 17.6$  Hz, 10.8 Hz, 1H), 5.70 (d,  $J = 17.6$  Hz, 1H), 5.13 (d,  $J = 11.2$  Hz, 1H), 3.18 (t,  $J = 7.2$  Hz, 2H), 2.94 (t,  $J = 7.2$  Hz, 2H);  $^{13}\text{C}\{^1\text{H}\}$  NMR (100 MHz, DMSO- $d_6$ )  $\delta$  (ppm) 169.7, 162.7, 144.7, 139.1, 136.2, 134.5, 132.2, 132.2, 128.9, 128.8, 128.7, 128.6, 128.2, 127.5, 126.7, 126.3, 119.2, 112.7, 32.8, 23.2.

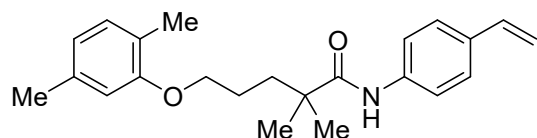

#### 5-(2,5-dimethylphenoxy)-2,2-dimethyl-N-(4-vinylphenyl)pentanamide (3at')

Overall Yield: 88% (1545.3 mg). Nature: white solid. Purification of the product was performed by silica gel column chromatography (eluent: PE/EA = 4:1).  $^1\text{H NMR}$  (400 MHz,  $\text{DMSO-}d_6$ )  $\delta$  (ppm) 9.26 (s, 1H), 7.63 (d,  $J = 8.8$  Hz, 2H), 7.39 (d,  $J = 8.8$  Hz, 2H), 6.95 (d,  $J = 8.4$  Hz, 1H), 6.70-6.59 (m, 3H), 5.72 (dd,  $J = 17.6$  Hz, 0.8 Hz, 1H), 5.16 (d,  $J = 11.2$  Hz, 1H), 3.89 (t,  $J = 6.4$  Hz, 2H), 2.21 (s, 3H), 2.07 (s, 3H), 1.77-1.74 (m, 2H), 1.69-1.62 (m, 2H), 1.23 (s, 6H);  $^{13}\text{C}\{^1\text{H}\}$  NMR (100 MHz,  $\text{DMSO-}d_6$ )  $\delta$  (ppm) 175.7, 156.5, 139.1, 136.3, 136.1, 132.2, 130.1, 126.3, 122.5, 120.5, 120.3, 112.7, 112.0, 67.6, 42.4, 36.7, 25.1, 24.7, 21.0, 15.6.

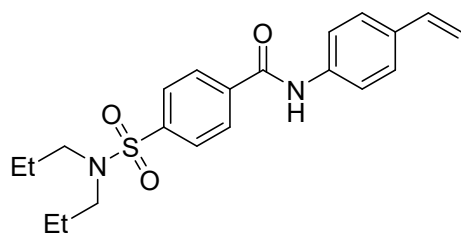

#### 4-(*N,N*-dipropylsulfamoyl)-*N*-(4-vinylphenyl)benzamide (3au')

Overall Yield: 88% (1699.1 mg). Nature: white solid. Purification of the product was performed by silica gel column chromatography (eluent: PE/EA = 4:1).  $^1\text{H NMR}$  (400 MHz,  $\text{DMSO-}d_6$ )  $\delta$  (ppm) 10.63 (s, 1H), 8.11 (d,  $J = 8.8$  Hz, 2H), 7.90 (d,  $J = 8.8$  Hz, 2H), 7.62 (d,  $J = 8.8$  Hz, 2H), 7.39 (d,  $J = 8.8$  Hz, 2H), 6.69-6.62 (m, 1H), 5.72 (d,  $J = 17.6$  Hz, 1H), 5.14 (d,  $J = 11.6$  Hz, 1H), 3.03 (t,  $J = 7.2$  Hz, 4H), 1.50-1.41 (m, 4H), 0.79 (t,  $J = 7.2$  Hz, 6H);  $^{13}\text{C}\{^1\text{H}\}$  NMR (100 MHz,  $\text{DMSO-}d_6$ )  $\delta$  (ppm) 166.3, 143.2, 138.4, 136.5, 134.3, 132.8, 130.3, 127.1, 126.3, 119.2, 112.6, 49.6, 21.6, 11.0.

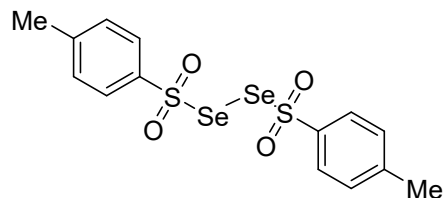

#### 4-methylbenzenesulfonic diselenoperoxyanhydride (2a-I)

Overall Yield: 21% (39.5 mg). Nature: pale yellow oil. Purification of the product was performed by silica gel column chromatography (eluent: PE/EA = 12:1).  $^1\text{H NMR}$  (400 MHz,  $\text{DMSO-}d_6$ )  $\delta$  (ppm) 7.82 (d,  $J = 8.0$  Hz, 4H), 7.40 (d,  $J = 8.0$  Hz, 4H), 2.33

(s, 6H);  $^{13}\text{C}\{^1\text{H}\}$  NMR (100 MHz, DMSO- $d_6$ )  $\delta$  (ppm) 144.1, 137.2, 130.3, 128.4, 21.7. **HRMS** (ESI)  $m/z$ :  $[\text{M}+\text{H}]^+$  Calcd for:  $\text{C}_{14}\text{H}_{15}\text{O}_4\text{S}_2\text{Se}_2^+$  470.8664; Found: 470.8661.

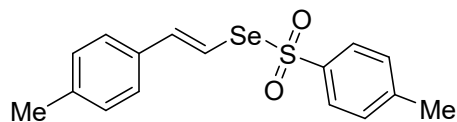

**(E)-Se-(4-methylstyryl) 4-methylbenzenesulfonoselenoate (3aa)**

Overall Yield: 80% (84.5 mg). Nature: white solid. Purification of the product was performed by silica gel column chromatography (eluent: PE/EA = 7:1). **Mp**: 135 – 137 °C.  $^1\text{H}$  NMR (400 MHz, DMSO- $d_6$ )  $\delta$  (ppm) 7.79 (d,  $J$  = 8.0 Hz, 2H), 7.62 (d,  $J$  = 8.0 Hz, 2H), 7.57 (d,  $J$  = 15.6 Hz, 1H), 7.50 (d,  $J$  = 15.6 Hz, 1H), 7.44 (d,  $J$  = 8.0 Hz, 2H), 7.23 (d,  $J$  = 8.0 Hz, 2H), 2.39 (s, 3H), 2.32 (s, 3H);  $^{13}\text{C}\{^1\text{H}\}$  NMR (100 MHz, DMSO- $d_6$ )  $\delta$  (ppm) 144.1, 141.5, 141.3, 138.0, 130.1, 129.8, 129.7, 129.0, 127.3, 127.2, 21.2, 21.1; **HRMS** (ESI)  $m/z$ :  $[\text{M}+\text{H}]^+$  Calcd for:  $\text{C}_{16}\text{H}_{17}\text{O}_2\text{SSe}^+$  353.0036; Found: 353.0038.

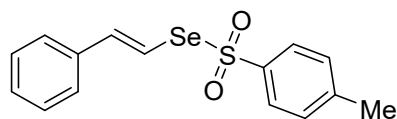

**(E)-Se-styryl 4-methylbenzenesulfonoselenoate (3ab)**

Overall Yield: 67% (67.9 mg). Nature: white solid. Purification of the product was performed by silica gel column chromatography (eluent: PE/EA = 6:1). **Mp**: 112 – 114 °C.  $^1\text{H}$  NMR (400 MHz, DMSO- $d_6$ )  $\delta$  (ppm) 7.83 (d,  $J$  = 8.4 Hz, 2H), 7.73 (dd,  $J$  = 6.8 Hz, 2.0 Hz, 2H), 7.66 (d,  $J$  = 15.2 Hz, 1H), 7.59 (d,  $J$  = 15.2 Hz, 1H), 7.43-7.37 (m, 5H), 2.35 (s, 3H);  $^{13}\text{C}\{^1\text{H}\}$  NMR (100 MHz, DMSO- $d_6$ )  $\delta$  (ppm) 144.1, 141.5, 137.9, 132.4, 131.1, 130.0, 129.0, 128.9, 128.4, 127.2, 21.0. **HRMS** (ESI)  $m/z$ :  $[\text{M}+\text{H}]^+$  Calcd for:  $\text{C}_{15}\text{H}_{15}\text{O}_2\text{SSe}^+$  338.9880; Found: 338.9886.

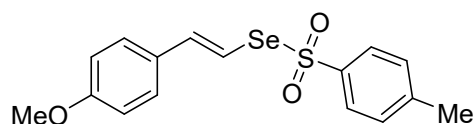

**(E)-Se-(4-methoxystyryl) 4-methylbenzenesulfonoselenoate (3ac)**

Overall Yield: 78% (86.1 mg). Nature: pale yellow solid. Purification of the product was performed by silica gel column chromatography (eluent: PE/EA = 6:1). **Mp**: 97 – 99 °C.  $^1\text{H}$  NMR (400 MHz, DMSO- $d_6$ )  $\delta$  (ppm) 7.78 (d,  $J$  = 8.4 Hz, 2H), 7.57 (d,  $J$  =

15.6 Hz, 1H), 7.49 (d,  $J = 15.6$  Hz, 1H), 7.39 (d,  $J = 8.0$  Hz, 2H), 7.19 (d,  $J = 8.8$  Hz, 2H), 6.86 (d,  $J = 8.4$  Hz, 2H), 3.71 (s, 3H), 2.38 (s, 3H);  $^{13}\text{C}\{^1\text{H}\}$  NMR (100 MHz, DMSO- $d_6$ )  $\delta$  (ppm) 159.1, 143.8, 140.6, 137.8, 131.2, 129.4, 128.1, 127.9, 124.7, 113.9, 55.0, 21.0; **HRMS** (ESI)  $m/z$ :  $[\text{M}+\text{H}]^+$  Calcd for:  $\text{C}_{16}\text{H}_{17}\text{O}_3\text{SSe}^+$  368.9985; Found: 368.9983.

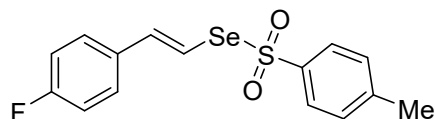

**(E)-Se-(4-fluorostyryl) 4-methylbenzenesulfonoselenoate (3ad)**

Overall Yield: 73% (78.0 mg). Nature: yellow solid. Purification of the product was performed by silica gel column chromatography (eluent: PE/EA = 7:1). **Mp**: 149 – 151 °C.  $^1\text{H}$  NMR (400 MHz, DMSO- $d_6$ )  $\delta$  (ppm) 7.79-7.75 (m, 4H), 7.60 (d,  $J = 15.6$  Hz, 1H), 7.47 (d,  $J = 15.6$  Hz, 1H), 7.41 (d,  $J = 8.0$  Hz, 2H), 7.25-7.19 (m, 2H), 2.35 (s, 3H);  $^{13}\text{C}\{^1\text{H}\}$  NMR (100 MHz, DMSO- $d_6$ )  $\delta$  (ppm) 163.9 (d,  $J_{\text{C-F}} = 248.3$  Hz), 144.6, 140.7, 137.9, 131.7 (d,  $J_{\text{C-F}} = 8.7$  Hz), 130.4, 129.2 (d,  $J_{\text{C-F}} = 3.2$  Hz), 128.3 (d,  $J_{\text{C-F}} = 2.1$  Hz), 127.5, 116.3 (d,  $J_{\text{C-F}} = 21.9$  Hz), 21.0;  $^{19}\text{F}\{^1\text{H}\}$  NMR (376.8 MHz, DMSO- $d_6$ )  $\delta = -108.6$  ppm; **HRMS** (ESI)  $m/z$ :  $[\text{M}+\text{H}]^+$  Calcd for:  $\text{C}_{15}\text{H}_{14}\text{FO}_2\text{SSe}^+$  356.9786; Found: 356.97864.

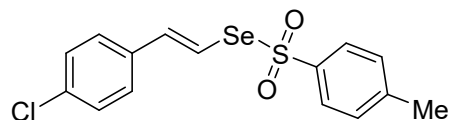

**(E)-Se-(4-chlorostyryl) 4-methylbenzenesulfonoselenoate (3ae)**

Overall Yield: 77% (85.9 mg). Nature: pale yellow solid. Purification of the product was performed by silica gel column chromatography (eluent: PE/EA = 6:1). **Mp**: 150 – 152 °C.  $^1\text{H}$  NMR (400 MHz, DMSO- $d_6$ )  $\delta$  (ppm) 7.80 (d,  $J = 8.4$  Hz, 2H), 7.76 (dd,  $J = 6.8$  Hz, 1.6 Hz, 2H), 7.63 (s, 2H), 7.46 (dd,  $J = 6.8$  Hz, 2.0 Hz, 2H), 7.43 (d,  $J = 8.4$  Hz, 2H), 2.37 (s, 3H);  $^{13}\text{C}\{^1\text{H}\}$  NMR (100 MHz, DMSO- $d_6$ )  $\delta$  (ppm) 144.3, 140.1, 137.7, 135.7, 131.4, 130.7, 130.1, 129.2, 129.1, 127.3, 21.1; **HRMS** (ESI)  $m/z$ :  $[\text{M}+\text{H}]^+$  Calcd for:  $\text{C}_{15}\text{H}_{14}\text{ClO}_2\text{SSe}^+$  372.9490; Found: 372.9490.

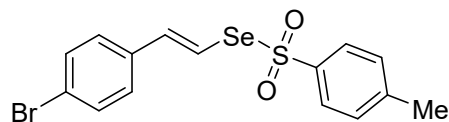

**(E)-Se-(4-bromostyryl) 4-methylbenzenesulfonoselenoate (3af)**

Overall Yield: 65% (81.1 mg). Nature: yellow solid. Purification of the product was performed by silica gel column chromatography (eluent: PE/EA = 7:1). **Mp**: 143 – 145 °C. **<sup>1</sup>H NMR** (400 MHz, DMSO-*d*<sub>6</sub>) δ (ppm) 7.79 (d, *J* = 8.0 Hz, 2H), 7.68 (d, *J* = 8.4 Hz, 2H), 7.62-7.58 (m, 4H), 7.42 (d, *J* = 8.4 Hz, 2H), 2.36 (s, 3H); **<sup>13</sup>C{<sup>1</sup>H} NMR** (100 MHz, DMSO-*d*<sub>6</sub>) δ (ppm) 144.3, 140.3, 137.7, 132.0, 131.8, 130.9, 130.1, 129.2, 127.3, 124.7, 21.1; **HRMS** (ESI) *m/z*: [M+H]<sup>+</sup> Calcd for: C<sub>15</sub>H<sub>14</sub>BrO<sub>2</sub>SSe<sup>+</sup> 416.8985; Found: 416.8988.

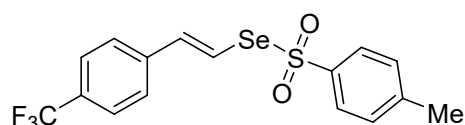

**(E)-Se-(4-(trifluoromethyl)styryl) 4-methylbenzenesulfonoselenoate (3ag)**

Overall Yield: 79% (96.2 mg). Nature: white solid. Purification of the product was performed by silica gel column chromatography (eluent: PE/EA = 7:1). **Mp**: 124 – 126 °C. **<sup>1</sup>H NMR** (400 MHz, DMSO-*d*<sub>6</sub>) δ (ppm) 7.94 (d, *J* = 8.4 Hz, 2H), 7.84-7.70 (m, 6H), 7.43 (d, *J* = 8.4 Hz, 2H), 2.36 (s, 3H); **<sup>13</sup>C{<sup>1</sup>H} NMR** (100 MHz, DMSO-*d*<sub>6</sub>) δ (ppm) 163.9 (d, *J*<sub>C-F</sub> = 248.3 Hz), 144.5, 139.7, 137.4, 136.5, 131.3, 130.6 (d, *J*<sub>C-F</sub> = 31.8 Hz), 130.1, 129.6, 127.4, 125.7 (d, *J*<sub>C-F</sub> = 3.8 Hz), 123.9 (d, *J*<sub>C-F</sub> = 279.7 Hz), 21.1; **<sup>19</sup>F{<sup>1</sup>H} NMR** (376.8 MHz, DMSO-*d*<sub>6</sub>) δ = -61.6 ppm; **HRMS** (ESI) *m/z*: [M+H]<sup>+</sup> Calcd for: C<sub>16</sub>H<sub>14</sub>F<sub>3</sub>O<sub>2</sub>SSe<sup>+</sup> 406.9754; Found: 406.9756.

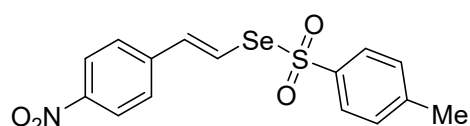

**(E)-Se-(4-nitrostyryl) 4-methylbenzenesulfonoselenoate (3ah)**

Overall Yield: 63% (72.4 mg). Nature: white solid. Purification of the product was performed by silica gel column chromatography (eluent: PE/EA = 5:1). **Mp**: 167 – 169 °C. **<sup>1</sup>H NMR** (400 MHz, DMSO-*d*<sub>6</sub>) δ (ppm) 8.26 (d, *J* = 8.8 Hz, 2H), 8.03 (d, *J* = 8.8 Hz, 2H), 7.88 (d, *J* = 15.6 Hz, 1H), 7.84 (d, *J* = 8.4 Hz, 2H), 7.77 (d, *J* = 15.2 Hz, 1H), 7.49 (d, *J* = 8.0 Hz, 2H), 2.42 (s, 3H); **<sup>13</sup>C{<sup>1</sup>H} NMR** (100 MHz, DMSO-*d*<sub>6</sub>) δ (ppm) 148.4, 144.6, 138.9, 138.9, 137.1, 132.5, 130.2, 130.1, 127.5, 124.0, 21.1; **HRMS** (ESI) *m/z*: [M+H]<sup>+</sup> Calcd for: C<sub>15</sub>H<sub>14</sub>NO<sub>4</sub>SSe<sup>+</sup> 383.9731; Found: 383.9735.

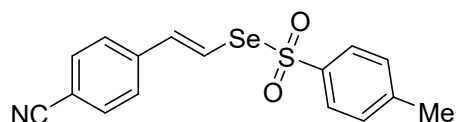

**(E)-Se-(4-cyanostyryl) 4-methylbenzenesulfonoselenoate (3ai)**

Overall Yield: 72% (78.4 mg). Nature: white solid. Purification of the product was performed by silica gel column chromatography (eluent: PE/EA = 7:1). **Mp**: 121 – 123 °C. **<sup>1</sup>H NMR** (400 MHz, DMSO-*d*<sub>6</sub>) δ (ppm) 7.93 (d, *J* = 8.4 Hz, 2H), 7.88 (d, *J* = 8.4 Hz, 2H), 7.83-7.79 (m, 3H), 7.70 (d, *J* = 15.2 Hz, 1H), 7.45 (d, *J* = 8.0 Hz, 2H), 2.39 (s, 3H); **<sup>13</sup>C{<sup>1</sup>H} NMR** (100 MHz, DMSO-*d*<sub>6</sub>) δ (ppm) 144.6, 139.5, 137.2, 137.0, 132.8, 131.8, 130.2, 129.6, 127.4, 118.5, 113.0, 21.1; **HRMS** (ESI) *m/z*: [M+H]<sup>+</sup> Calcd for: C<sub>16</sub>H<sub>14</sub>NO<sub>2</sub>SSe<sup>+</sup> 363.9832; Found: 363.9834.

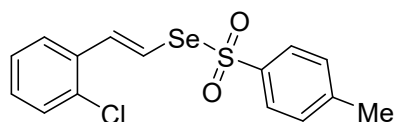

**(E)-Se-(2-chlorostyryl) 4-methylbenzenesulfonoselenoate (3aj)**

Overall Yield: 62% (69.2 mg). Nature: pale yellow solid. Purification of the product was performed by silica gel column chromatography (eluent: PE/EA = 7:1). **Mp**: 146 – 148 °C. **<sup>1</sup>H NMR** (400 MHz, DMSO-*d*<sub>6</sub>) δ (ppm) 7.91-7.85 (m, 2H), 7.82 (d, *J* = 8.4 Hz, 2H), 7.72 (d, *J* = 15.6 Hz, 1H), 7.54 (dd, *J* = 8.0 Hz, 0.8 Hz, 1H), 7.47-7.42 (m, 3H), 7.37 (t, *J* = 7.2 Hz, 1H), 2.39 (s, 3H); **<sup>13</sup>C{<sup>1</sup>H} NMR** (100 MHz, DMSO-*d*<sub>6</sub>) δ (ppm) 144.5, 137.1, 136.1, 134.1, 132.6, 131.3, 130.2, 130.1, 130.0, 128.9, 127.8, 127.4, 21.1; **HRMS** (ESI) *m/z*: [M+H]<sup>+</sup> Calcd for: C<sub>15</sub>H<sub>14</sub>ClO<sub>2</sub>SSe<sup>+</sup> 372.9490; Found: 372.9492.

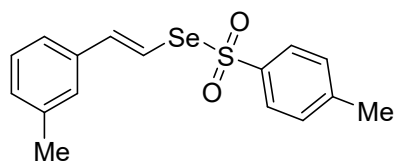

**(E)-Se-(3-methylstyryl) 4-methylbenzenesulfonoselenoate (3ak)**

Overall Yield: 60% (63.4 mg). Nature: white solid. Purification of the product was performed by silica gel column chromatography (eluent: PE/EA = 7:1). **Mp**: 128 – 130 °C. **<sup>1</sup>H NMR** (400 MHz, DMSO-*d*<sub>6</sub>) δ (ppm) 7.79 (dd, *J* = 6.8 Hz, 2.0 Hz, 2H), 7.55 (d, *J* = 2.4 Hz, 3H), 7.51 (d, *J* = 7.6 Hz, 1H), 7.44 (d, *J* = 8.0 Hz, 2H), 7.30 (t, *J* = 7.6 Hz, 1H), 7.25 (d, *J* = 7.6 Hz, 1H), 2.39 (s, 3H), 2.29 (s, 3H); **<sup>13</sup>C{<sup>1</sup>H} NMR** (100

MHz, DMSO-*d*<sub>6</sub>)  $\delta$  (ppm) 144.2, 141.6, 138.3, 137.9, 132.4, 131.8, 130.1, 129.3, 128.9, 128.2, 127.2, 126.3, 21.1, 20.8; **HRMS** (ESI) *m/z*: [M+H]<sup>+</sup> Calcd for: C<sub>16</sub>H<sub>17</sub>O<sub>2</sub>SSe<sup>+</sup> 353.0036; Found: 353.0033.

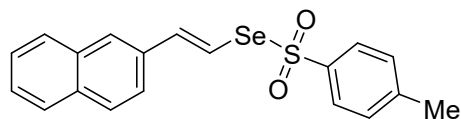

**(E)-Se-(2-(naphthalen-2-yl)vinyl) 4-methylbenzenesulfonoselenoate (3al)**

Overall Yield: 69% (80.3 mg). Nature: yellow solid. Purification of the product was performed by silica gel column chromatography (eluent: PE/EA = 6:1). **Mp**: 118 – 120 °C. **<sup>1</sup>H NMR** (400 MHz, DMSO-*d*<sub>6</sub>)  $\delta$  (ppm) 8.25 (s, 1H), 7.93-7.85 (m, 6H), 7.80 (d, *J* = 15.2 Hz, 1H), 7.71 (d, *J* = 15.2 Hz, 1H), 7.58-7.52 (m, 2H), 7.44 (d, *J* = 8.0 Hz, 2H), 2.36 (s, 3H); **<sup>13</sup>C{<sup>1</sup>H} NMR** (100 MHz, DMSO-*d*<sub>6</sub>)  $\delta$  (ppm) 144.2, 141.5, 137.9, 134.0, 132.7, 131.0, 130.1, 128.7, 128.7, 128.6, 127.7, 127.3, 126.9, 124.1, 21.1; **HRMS** (ESI) *m/z*: [M+H]<sup>+</sup> Calcd for: C<sub>19</sub>H<sub>17</sub>O<sub>2</sub>SSe<sup>+</sup> 389.0036; Found: 389.0032.

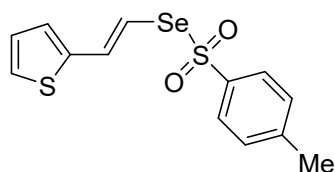

**(E)-Se-(2-(thiophen-2-yl)vinyl) 4-methylbenzenesulfonoselenoate (3am)**

Overall Yield: 69% (71.2 mg). Nature: yellow oil. Purification of the product was performed by silica gel column chromatography (eluent: PE/EA = 6:1). **<sup>1</sup>H NMR** (400 MHz, DMSO-*d*<sub>6</sub>)  $\delta$  (ppm) 7.81-7.77 (m, 4H), 7.63 (d, *J* = 3.6 Hz, 1H), 7.45 (d, *J* = 8.0 Hz, 2H), 7.23 (d, *J* = 15.2 Hz, 1H), 7.15 (dd, *J* = 5.2 Hz, 3.6 Hz, 1H), 2.39 (s, 3H); **<sup>13</sup>C{<sup>1</sup>H} NMR** (100 MHz, DMSO-*d*<sub>6</sub>)  $\delta$  (ppm) 144.1, 138.0, 136.6, 134.5, 133.3, 131.4, 130.1, 128.6, 127.2, 126.0, 21.1; **HRMS** (ESI) *m/z*: [M+H]<sup>+</sup> Calcd for: C<sub>13</sub>H<sub>13</sub>O<sub>2</sub>S<sub>2</sub>Se<sup>+</sup> 344.9444; Found: 344.9448.

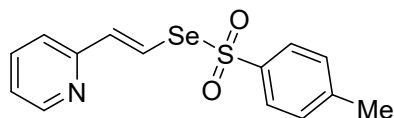

**(E)-Se-(2-(pyridin-2-yl)vinyl) 4-methylbenzenesulfonoselenoate (3an)**

Overall Yield: 62% (63.1 mg). Nature: pale yellow solid. Purification of the product was performed by silica gel column chromatography (eluent: PE/EA = 6:1). **Mp**: 93 –

95 °C.  $^1\text{H NMR}$  (400 MHz,  $\text{DMSO-}d_6$ )  $\delta$  (ppm) 8.60 (dd,  $J = 4.8$  Hz, 0.8 Hz, 1H), 7.86-7.81 (m, 3H), 7.77 (d,  $J = 7.6$  Hz, 1H), 7.67 (s, 2H), 7.41-7.37 (m, 3H), 2.33 (s, 3H);  $^{13}\text{C}\{^1\text{H}\}$  NMR (100 MHz,  $\text{DMSO-}d_6$ )  $\delta$  (ppm) 150.7, 150.1, 144.5, 140.6, 137.4, 137.2, 131.8, 130.1, 127.5, 125.5, 125.3, 21.1; **HRMS** (ESI)  $m/z$ :  $[\text{M}+\text{H}]^+$  Calcd for:  $\text{C}_{14}\text{H}_{14}\text{NO}_2\text{SSe}^+$  339.9832; Found: 339.9836.

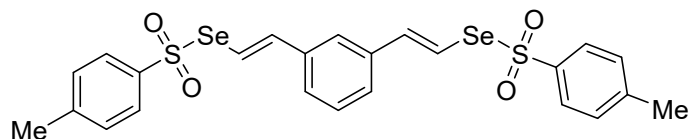

***Se, Se'*-((1*E*, 1'*E*)-1, 3-phenylenebis(ethene-2, 1-diyl)) bis(4-methylbenzenesulfonate) (3ao)**

Overall Yield: 75% (134.5 mg). Nature: white solid. Purification of the product was performed by silica gel column chromatography (eluent: PE/EA = 10:1). **Mp**: 102 – 104 °C.  $^1\text{H NMR}$  (400 MHz,  $\text{DMSO-}d_6$ )  $\delta$  (ppm) 8.20 (s, 1H), 7.80-7.77 (m, 6H), 7.65 (d,  $J = 15.6$  Hz, 2H), 7.61 (d,  $J = 15.6$  Hz, 2H), 7.50-7.43 (m, 5H), 2.37 (s, 6H);  $^{13}\text{C}\{^1\text{H}\}$  NMR (100 MHz,  $\text{DMSO-}d_6$ )  $\delta$  (ppm) 144.4, 140.6, 137.6, 133.2, 131.8, 130.2, 129.8, 129.5, 128.0, 127.3, 21.1; **HRMS** (ESI)  $m/z$ :  $[\text{M}+\text{H}]^+$  Calcd for:  $\text{C}_{24}\text{H}_{23}\text{O}_4\text{S}_2\text{Se}_2^+$  598.9290; Found: 598.9290.

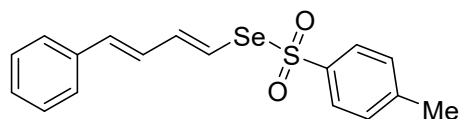

***Se*-((1*E*,3*E*)-4-phenylbuta-1,3-dien-1-yl) 4-methylbenzenesulfonate (3ap)**

Overall Yield: 49% (53.5 mg). Nature: white solid. Purification of the product was performed by silica gel column chromatography (eluent: PE/EA = 8:1). **Mp**: 127 – 129 °C.  $^1\text{H NMR}$  (400 MHz,  $\text{DMSO-}d_6$ )  $\delta$  (ppm) 7.76 (d,  $J = 8.0$  Hz, 2H), 7.44 (d,  $J = 8.0$  Hz, 2H), 7.41-7.30 (m, 6H), 7.22 (d,  $J = 15.6$  Hz, 1H), 7.04 (dd,  $J = 15.6$  Hz, 10.8 Hz, 1H), 6.90 (d,  $J = 14.4$  Hz, 1H), 2.39 (s, 3H);  $^{13}\text{C}\{^1\text{H}\}$  NMR (100 MHz,  $\text{DMSO-}d_6$ )  $\delta$  (ppm) 144.2, 142.5, 141.9, 138.0, 135.5, 132.3, 130.1, 129.5, 129.0, 127.4, 127.2, 124.3, 21.1; **HRMS** (ESI)  $m/z$ :  $[\text{M}+\text{H}]^+$  Calcd for:  $\text{C}_{17}\text{H}_{17}\text{O}_2\text{SSe}^+$  365.0036; Found: 365.0038.

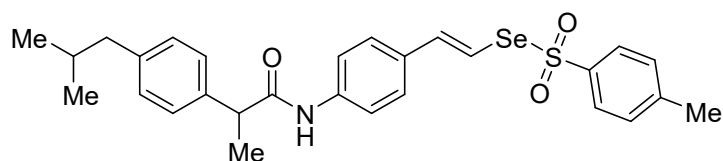



**(E)-Se-(4-(2-(4-isobutylphenyl)propanamido)styryl) 4-methylbenzenesulfonosele-  
noate (3aq)**

Overall Yield: 61% (99.0 mg). Nature: pale yellow oil. Purification of the product was performed by silica gel column chromatography (eluent: PE/EA = 3:1). <sup>1</sup>H NMR (400 MHz, DMSO-*d*<sub>6</sub>) δ (ppm) 10.11 (s, 1H), 7.78 (d, *J* = 8.4 Hz, 2H), 7.65 (d, *J* = 15.2 Hz, 1H), 7.59 (d, *J* = 15.6 Hz, 1H), 7.44 (d, *J* = 7.6 Hz, 2H), 7.39-7.32 (m, 4H), 7.20 (d, *J* = 8.8 Hz, 2H), 7.07 (d, *J* = 8.4 Hz, 2H), 4.01 (q, *J* = 7.2 Hz, 1H), 2.36 (d, *J* = 7.2 Hz, 2H), 2.34 (s, 3H), 1.80-1.71 (m, 1H), 1.42 (d, *J* = 6.8 Hz, 3H), 0.80 (d, *J* = 6.8 Hz, 6H); <sup>13</sup>C{<sup>1</sup>H} NMR (100 MHz, DMSO-*d*<sub>6</sub>) δ (ppm) 172.5, 143.8, 139.5, 139.3, 139.2, 138.3, 137.8, 133.9, 129.4, 128.9, 127.9, 127.2, 127.0, 126.4, 119.2, 45.7, 44.3, 29.7, 22.1, 21.0, 18.7. HRMS (ESI) *m/z*: [M+H]<sup>+</sup> Calcd for: C<sub>28</sub>H<sub>32</sub>NO<sub>3</sub>SSe<sup>+</sup> 542.1190; Found: 542.1192.

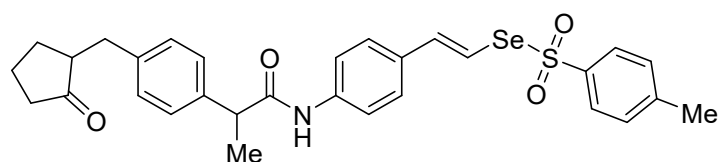

**(E)-Se-(4-(2-(4-((2-oxocyclopentyl)methyl)phenyl)propanamido)styryl) 4-methyl-  
benzenesulfonosele-  
noate (3ar)**

Overall Yield: 70% (122.0 mg). Nature: yellow oil. Purification of the product was performed by silica gel column chromatography (eluent: PE/EA = 2:1). <sup>1</sup>H NMR (400 MHz, DMSO-*d*<sub>6</sub>) δ (ppm) 10.09 (s, 1H), 7.76 (d, *J* = 8.4 Hz, 2H), 7.68 (d, *J* = 14.0 Hz, 1H), 7.58-7.53 (m, 3H), 7.37 (d, *J* = 8.4 Hz, 2H), 7.31 (d, *J* = 8.0 Hz, 2H), 7.18 (d, *J* = 8.8 Hz, 2H), 7.12 (d, *J* = 8.0 Hz, 2H), 4.01 (q, *J* = 7.2 Hz, 1H), 2.93 (dd, *J* = 13.2 Hz, 3.6 Hz, 1H), 2.42-2.27 (m, 5H), 2.23-2.16 (m, 1H), 2.06-1.99 (m, 1H), 1.90-1.76 (m, 2H), 1.68-1.56 (m, 1H), 1.47-1.38 (m, 4H); <sup>13</sup>C{<sup>1</sup>H} NMR (100 MHz, DMSO-*d*<sub>6</sub>) δ (ppm) 219.2, 172.4, 143.9, 139.5, 139.2, 138.6, 138.2, 137.8, 133.9, 129.4, 128.9, 128.8, 127.9, 127.3, 127.2, 119.2, 50.1, 45.7, 37.6, 34.6, 28.8, 21.1, 20.1, 18.6. HRMS (ESI) *m/z*: [M+H]<sup>+</sup> Calcd for: C<sub>30</sub>H<sub>32</sub>NO<sub>4</sub>SSe<sup>+</sup> 582.1139; Found: 582.1136.

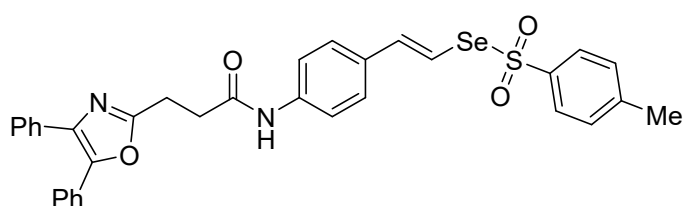

**(E)-Se-(4-(3-(4,5-diphenyloxazol-2-yl)propanamido)styryl) 4-methylbenzenesulfonoselenoate (3as)**

Overall Yield: 59% (111.2 mg). Nature: pale yellow oil. Purification of the product was performed by silica gel column chromatography (eluent: PE/EA = 1:1).  $^1\text{H NMR}$  (400 MHz,  $\text{DMSO-}d_6$ )  $\delta$  (ppm) 10.16 (s, 1H), 7.76 (d,  $J = 8.4$  Hz, 2H), 7.66 (d,  $J = 15.2$  Hz, 1H), 7.57-7.49 (m, 5H), 7.44-7.31 (m, 10H), 7.20 (d,  $J = 8.4$  Hz, 2H), 3.15 (t,  $J = 7.2$  Hz, 2H), 2.90 (t,  $J = 7.2$  Hz, 2H), 2.37 (m, 3H);  $^{13}\text{C}\{^1\text{H}\}$  NMR (100 MHz,  $\text{DMSO-}d_6$ )  $\delta$  (ppm) 169.7, 162.7, 144.7, 143.9, 139.1, 138.2, 137.8, 134.4, 133.9, 132.1, 130.1, 129.4, 129.0, 128.8, 128.7, 128.5, 128.2, 127.9, 127.4, 127.3, 126.3, 119.1, 32.7, 23.2, 21.1. **HRMS** (ESI)  $m/z$ :  $[\text{M}+\text{H}]^+$  Calcd for:  $\text{C}_{33}\text{H}_{29}\text{N}_2\text{O}_4\text{SSe}^+$  629.0935; Found: 629.0932.

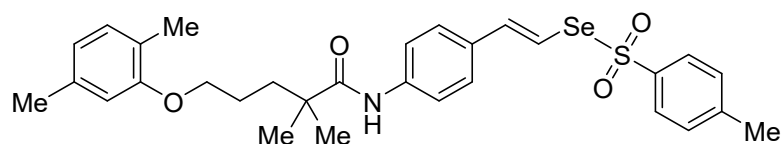

**(E)-Se-(4-(5-(2,5-dimethylphenoxy)-2,2-dimethylpentanamido)styryl) 4-methylbenzenesulfonoselenoate (3at)**

Overall Yield: 60% (114.3 mg). Nature: white solid. Purification of the product was performed by silica gel column chromatography (eluent: PE/EA = 4:1). **Mp**: 142 – 144 °C.  $^1\text{H NMR}$  (400 MHz,  $\text{DMSO-}d_6$ )  $\delta$  (ppm) 9.58 (s, 1H), 7.88 (d,  $J = 8.4$  Hz, 2H), 7.81 (d,  $J = 8.0$  Hz, 2H), 7.73 (d,  $J = 15.2$  Hz, 1H), 7.65 (d,  $J = 14.4$  Hz, 1H), 7.55 (d,  $J = 8.0$  Hz, 2H), 7.38 (d,  $J = 8.8$  Hz, 2H), 6.95 (d,  $J = 7.6$  Hz, 1H), 6.65 (s, 1H), 6.57 (d,  $J = 7.2$  Hz, 1H), 3.88 (t,  $J = 6.4$  Hz, 2H), 2.32 (s, 3H), 2.20 (s, 3H), 2.06 (s, 3H), 1.77-1.71 (m, 2H), 1.68-1.61 (m, 2H), 1.22 (s, 6H);  $^{13}\text{C}\{^1\text{H}\}$  NMR (100 MHz,  $\text{DMSO-}d_6$ )  $\delta$  (ppm) 177.7, 156.3, 144.0, 139.3, 138.4, 137.6, 136.7, 135.8, 132.6, 130.5, 129.9, 129.4, 127.9, 125.7, 122.3, 120.9, 113.4, 67.4, 42.0, 36.7, 25.1, 24.6, 21.5, 20.8, 15.4; **HRMS** (ESI)  $m/z$ :  $[\text{M}+\text{H}]^+$  Calcd for:  $\text{C}_{30}\text{H}_{36}\text{NO}_4\text{SSe}^+$  586.1452; Found: 586.1455.

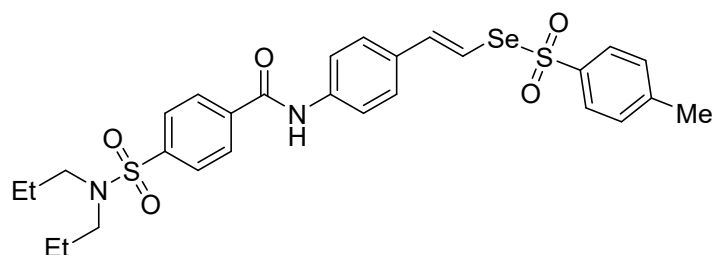

**(E)-Se-(4-(4-(N,N-dipropylsulfamoyl)benzamido)styryl) 4-methylbenzenesulfonate (3au)**

Overall Yield: 65% (120.9 mg). Nature: pale yellow oil. Purification of the product was performed by silica gel column chromatography (eluent: PE/EA = 4:1).  $^1\text{H NMR}$  (400 MHz, DMSO- $d_6$ )  $\delta$  (ppm) 10.22 (s, 1H), 8.11 (d,  $J = 8.4$  Hz, 2H), 7.91-7.86 (m, 4H), 7.73 (d,  $J = 8.0$  Hz, 2H), 7.66 (d,  $J = 8.4$  Hz, 2H), 7.58 (d,  $J = 14.4$  Hz, 1H), 7.51 (d,  $J = 15.2$  Hz, 1H), 7.43 (d,  $J = 8.0$  Hz, 2H), 3.03 (t,  $J = 7.2$  Hz, 4H), 2.31 (s, 3H), 1.49-1.40 (m, 4H), 0.78 (t,  $J = 7.2$  Hz, 6H);  $^{13}\text{C}\{^1\text{H}\}$  NMR (100 MHz, DMSO- $d_6$ )  $\delta$  (ppm) 167.4, 143.3, 139.9, 139.8, 136.5, 135.4, 134.8, 132.5, 129.2, 129.2, 128.1, 127.3, 127.2, 120.4, 111.9, 49.3, 21.3, 20.6, 10.8; **HRMS** (ESI)  $m/z$ :  $[\text{M}+\text{H}]^+$  Calcd for:  $\text{C}_{28}\text{H}_{33}\text{N}_2\text{O}_5\text{S}_2\text{Se}^+$  621.0918; Found: 621.0916.

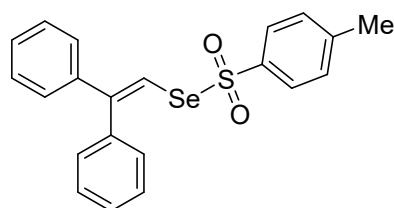

**Se-(2,2-diphenylvinyl) 4-methylbenzenesulfonoselenoate (3ax)**

Overall Yield: 52% (64.6 mg). Nature: white solid. Purification of the product was performed by silica gel column chromatography (eluent: PE/EA = 10:1). **Mp**: 107 – 109 °C.  $^1\text{H NMR}$  (400 MHz, DMSO- $d_6$ )  $\delta$  (ppm) 7.93 (d,  $J = 8.0$  Hz, 2H), 7.43 (d,  $J = 8.4$  Hz, 2H), 7.36-7.30 (m, 6H), 7.29-7.21 (m, 4H), 7.03 (s, 1H), 2.24 (s, 3H);  $^{13}\text{C}\{^1\text{H}\}$  NMR (100 MHz, DMSO- $d_6$ )  $\delta$  (ppm) 154.3, 144.1, 139.0, 138.9, 136.9, 130.0, 129.7, 129.2, 128.5, 127.9, 127.9, 127.7, 127.6, 127.0, 21.0; **HRMS** (ESI)  $m/z$ :  $[\text{M}+\text{H}]^+$  Calcd for:  $\text{C}_{21}\text{H}_{19}\text{O}_2\text{SSe}^+$  415.0193; Found: 415.0190.

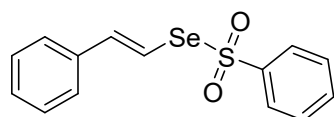

**(E)-Se-styryl benzenesulfonoselenoate (3ba)**

Overall Yield: 73% (70.9 mg). Nature: yellow oil. Purification of the product was performed by silica gel column chromatography (eluent: PE/EA = 7:1).  $^1\text{H NMR}$  (400 MHz, DMSO- $d_6$ )  $\delta$  (ppm) 7.93 (d,  $J = 8.8$  Hz, 2H), 7.80-7.60 (m, 7H), 7.45-7.41 (m, 3H);  $^{13}\text{C}\{^1\text{H}\}$  NMR (100 MHz, DMSO- $d_6$ )  $\delta$  (ppm) 142.1, 139.4, 133.7, 132.4, 131.3, 129.7, 129.1, 129.0, 128.1, 127.2; **HRMS** (ESI)  $m/z$ :  $[\text{M}+\text{H}]^+$  Calcd for:

C<sub>14</sub>H<sub>13</sub>O<sub>2</sub>SSe<sup>+</sup> 324.9723; Found: 324.9726.

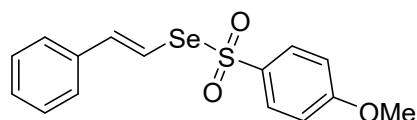

**(E)-Se-styryl 4-methoxybenzenesulfonoselenoate (3ca)**

Overall Yield: 82% (87.1 mg). Nature: white solid. Purification of the product was performed by silica gel column chromatography (eluent: PE/EA = 7:1). **Mp**: 84 – 86 °C. **<sup>1</sup>H NMR** (400 MHz, DMSO-*d*<sub>6</sub>) δ (ppm) 7.89-7.85 (m, 2H), 7.73-7.70 (m, 2H), 7.62 (d, *J* = 15.6 Hz, 1H), 7.55 (d, *J* = 15.2 Hz, 1H), 7.42-7.37 (m, 3H), 7.15 (dt, *J* = 3.2 Hz, 8.8 Hz, 2H), 3.82 (m, 3H); **<sup>13</sup>C{<sup>1</sup>H} NMR** (100 MHz, DMSO-*d*<sub>6</sub>) δ (ppm) 163.2, 140.9, 132.5, 132.2, 131.1, 129.6, 129.0, 128.9, 128.8, 114.9, 55.8; **HRMS** (ESI) *m/z*: [M+H]<sup>+</sup> Calcd for: C<sub>15</sub>H<sub>15</sub>O<sub>3</sub>SSe<sup>+</sup> 354.9829; Found: 354.9826.

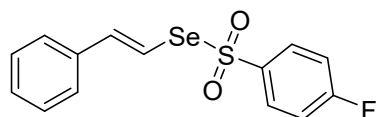

**(E)-Se-styryl 4-fluorobenzenesulfonoselenoate (3da)**

Overall Yield: 75% (76.9 mg). Nature: yellow solid. Purification of the product was performed by silica gel column chromatography (eluent: PE/EA = 6:1). **Mp**: 89 – 91 °C. **<sup>1</sup>H NMR** (400 MHz, DMSO-*d*<sub>6</sub>) δ (ppm) 8.03-7.98 (m, 2H), 7.74 (dd, *J* = 7.2 Hz, 1.6 Hz, 2H), 7.67 (d, *J* = 15.6 Hz, 1H), 7.63 (d, *J* = 15.6 Hz, 1H), 7.54-7.48 (m, 2H), 7.46-7.41 (m, 3H); **<sup>13</sup>C{<sup>1</sup>H} NMR** (100 MHz, DMSO-*d*<sub>6</sub>) δ (ppm) 164.9 (d, *J*<sub>C-F</sub> = 251.0 Hz), 142.2, 137.1 (d, *J*<sub>C-F</sub> = 2.9 Hz), 132.4, 131.3, 130.4 (d, *J*<sub>C-F</sub> = 9.7 Hz), 129.1, 129.1, 128.0, 116.9 (d, *J*<sub>C-F</sub> = 22.7 Hz); **<sup>19</sup>F{<sup>1</sup>H} NMR** (376.8 MHz, DMSO-*d*<sub>6</sub>) δ = -105.0 ppm; **HRMS** (ESI) *m/z*: [M+H]<sup>+</sup> Calcd for: C<sub>14</sub>H<sub>12</sub>FO<sub>2</sub>SSe<sup>+</sup> 342.9629; Found: 342.9627.

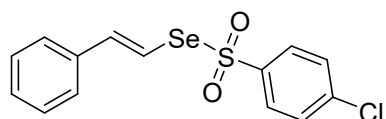

**(E)-Se-styryl 4-chlorobenzenesulfonoselenoate (3ea)**

Overall Yield: 79% (84.8 mg). Nature: pale yellow solid. Purification of the product was performed by silica gel column chromatography (eluent: PE/EA = 6:1). **Mp**: 93 – 95 °C. **<sup>1</sup>H NMR** (400 MHz, DMSO-*d*<sub>6</sub>) δ (ppm) 7.94 (dd, *J* = 6.4 Hz, 1.6 Hz, 2H), 7.76-7.72 (m, 4H), 7.69 (d, *J* = 14.4 Hz, 1H), 7.64 (d, *J* = 15.6 Hz, 1H), 7.46-7.41 (m, 3H); **<sup>13</sup>C{<sup>1</sup>H} NMR** (100 MHz, DMSO-*d*<sub>6</sub>) δ (ppm) 142.7, 139.6, 138.7, 132.4, 131.4,

129.9, 129.2, 129.2, 129.1, 127.7; **HRMS** (ESI)  $m/z$ :  $[M+H]^+$  Calcd for:  $C_{14}H_{12}ClO_2SSe^+$  358.9334; Found: 358.9334.

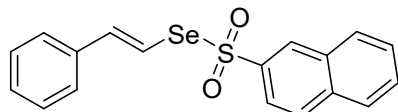

**(E)-Se-styryl naphthalene-2-sulfonoselenoate (3fa)**

Overall Yield: 69% (77.4 mg). Nature: brown solid. Purification of the product was performed by silica gel column chromatography (eluent: PE/EA = 8:1). **Mp**: 105 – 107 °C.  **$^1H$  NMR** (400 MHz,  $DMSO-d_6$ )  $\delta$  (ppm) 8.15 (s, 1H), 8.13 (d,  $J = 9.2$  Hz, 1H), 8.07 (d,  $J = 8.4$  Hz, 1H), 7.99-7.95 (m, 3H), 7.89 (d,  $J = 8.4$  Hz, 1H), 7.78 (d,  $J = 14.4$  Hz, 1H), 7.74 (d,  $J = 7.2$  Hz, 1H), 7.67-7.61 (m, 3H), 7.57-7.51 (m, 2H);  **$^{13}C\{^1H\}$  NMR** (100 MHz,  $DMSO-d_6$ )  $\delta$  (ppm) 139.1, 137.4, 134.9, 133.7, 131.3, 130.0, 129.7, 129.4, 129.0, 128.6, 128.1, 127.8, 127.3, 124.4; **HRMS** (ESI)  $m/z$ :  $[M+H]^+$  Calcd for:  $C_{18}H_{15}O_2SSe^+$  374.9880; Found: 374.9882.

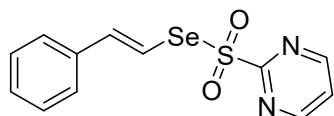

**(E)-Se-styryl pyrimidine-2-sulfonoselenoate (3ga)**

Overall Yield: 71% (69.4 mg). Nature: brown solid. Purification of the product was performed by silica gel column chromatography (eluent: PE/EA = 7:1). **Mp**: 116 – 118 °C.  **$^1H$  NMR** (400 MHz,  $DMSO-d_6$ )  $\delta$  (ppm) 9.08 (d,  $J = 4.8$  Hz, 2H), 7.85-7.83 (m, 3H), 7.76 (s, 2H), 7.52-7.44 (m, 3H);  **$^{13}C\{^1H\}$  NMR** (100 MHz,  $DMSO-d_6$ )  $\delta$  (ppm) 166.0, 159.3, 145.4, 132.3, 131.6, 129.3, 129.1, 124.9, 124.7; **HRMS** (ESI)  $m/z$ :  $[M+H]^+$  Calcd for:  $C_{12}H_{11}N_2O_2SSe^+$  326.9628; Found: 326.9624.

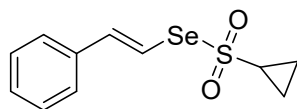

**(E)-Se-styryl cyclopropanesulfonoselenoate (3ha)**

Overall Yield: 58% (50.1 mg). Nature: pale yellow solid. Purification of the product was performed by silica gel column chromatography (eluent: PE/EA = 8:1). **Mp**: 89 – 91 °C.  **$^1H$  NMR** (400 MHz,  $DMSO-d_6$ )  $\delta$  (ppm) 7.77-7.74 (m, 2H), 7.52 (d,  $J = 15.6$  Hz, 1H), 7.48-7.44 (m, 4H), 2.74-2.67 (m, 1H), 1.06 (s, 2H), 1.05 (s, 2H);  **$^{13}C\{^1H\}$  NMR** (100 MHz,  $DMSO-d_6$ )  $\delta$  (ppm) 141.6, 132.6, 131.0, 129.1, 128.8, 127.2, 30.8, 4.9; **HRMS** (ESI)  $m/z$ :  $[M+H]^+$  Calcd for:  $C_{11}H_{13}O_2SSe^+$  288.9723; Found: 288.9723.

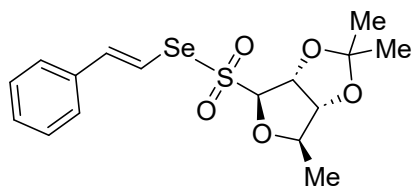

***Se-((E)-styryl) (3aR,4S,6R,6aR)-2,2,6-trimethyltetrahydrofuro[3,4-*d*][1,3]dioxole-4-sulfonoselenoate (3ia)***

Overall Yield: 51% (61.8 mg). Nature: white solid. Purification of the product was performed by silica gel column chromatography (eluent: PE/EA = 8:1). **Mp**: 92 – 94 °C. **<sup>1</sup>H NMR** (400 MHz, DMSO-*d*<sub>6</sub>) δ (ppm) 7.66 (d, *J* = 8.0 Hz, 2H), 7.60 (d, *J* = 15.2 Hz, 1H), 7.52 (d, *J* = 14.4 Hz, 1H), 7.44-7.40 (m, 3H), 5.12 (dd, *J* = 6.4 Hz, 2.0 Hz, 1H), 4.68 (dd, *J* = 6.0 Hz, 1.6 Hz, 1H), 4.33 (qd, *J* = 8.4 Hz, 1.6 Hz, 1H), 3.93 (d, *J* = 2.0 Hz, 1H), 1.30 (s, 6H), 1.11 (d, *J* = 6.4 Hz, 3H); **<sup>13</sup>C{<sup>1</sup>H} NMR** (100 MHz, DMSO-*d*<sub>6</sub>) δ (ppm) 141.3, 132.3, 130.7, 129.1, 128.7, 127.8, 121.3, 105.7, 90.4, 82.2, 72.5, 25.8, 25.6, 17.6; **HRMS** (ESI) *m/z*: [M+H]<sup>+</sup> Calcd for: C<sub>16</sub>H<sub>21</sub>O<sub>5</sub>SSe<sup>+</sup> 405.0197; Found: 405.0194.

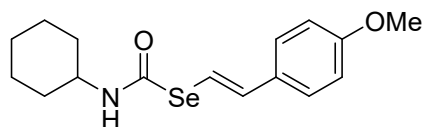

***(E)-Se-(4-methoxystyryl) cyclohexylcarbamoseleenoate (4aa)***

Overall Yield: 83% (84.4 mg). Nature: white solid. Purification of the product was performed by silica gel column chromatography (eluent: PE/EA = 35:1). **Mp**: 95 – 97 °C. **<sup>1</sup>H NMR** (400 MHz, DMSO-*d*<sub>6</sub>) δ (ppm) 8.43 (s, 1H), 7.59 (d, *J* = 15.6 Hz, 1H), 7.51-7.47 (m, 3H), 7.00 (d, *J* = 8.4 Hz, 2H), 3.82 (s, 3H), 3.23-3.16 (m, 1H), 1.97 (d, *J* = 12.8 Hz, 2H), 1.74 (d, *J* = 12.4 Hz, 2H), 1.56 (d, *J* = 13.2 Hz, 1H), 1.38-1.18 (m, 4H), 1.18-1.03 (m, 1H); **<sup>13</sup>C{<sup>1</sup>H} NMR** (100 MHz, DMSO-*d*<sub>6</sub>) δ (ppm) 161.2, 159.1, 136.8, 129.3, 127.2, 124.2, 114.1, 55.2, 52.4, 33.1, 25.1, 24.3; **HRMS** (ESI) *m/z*: [M+H]<sup>+</sup> Calcd for: C<sub>16</sub>H<sub>22</sub>NO<sub>2</sub>Se<sup>+</sup> 340.0738; Found: 340.0739.

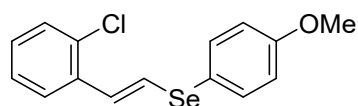

***(E)-(2-chlorostyryl)(4-methoxyphenyl)selane (4ab)***

Overall Yield: 70% (56.7 mg). Nature: pale yellow solid. Purification of the product was performed by silica gel column chromatography (eluent: PE/EA = 10:1). **Mp**: 81

– 83 °C. <sup>1</sup>H NMR (400 MHz, DMSO-*d*<sub>6</sub>) δ (ppm) 7.87-7.81 (m, 2H), 7.69 (d, *J* = 15.2 Hz, 1H), 7.49 (dd, *J* = 8.0 Hz, 1.2 Hz, 1H), 7.41 (d, *J* = 8.4 Hz, 2H), 7.36 (t, *J* = 7.2 Hz, 1H), 7.27 (t, *J* = 7.2 Hz, 1H), 7.04 (d, *J* = 8.4 Hz, 2H), 2.34 (s, 3H); <sup>13</sup>C{<sup>1</sup>H} NMR (100 MHz, DMSO-*d*<sub>6</sub>) δ (ppm) 159.2, 136.2, 134.7, 132.2, 130.1, 129.1, 128.6, 128.2, 127.7, 127.1, 126.8, 115.4, 55.2; HRMS (ESI) *m/z*: [M+H]<sup>+</sup> Calcd for: C<sub>15</sub>H<sub>14</sub>ClOSe<sup>+</sup> 324.9820; Found: 324.9823.

## 9. Reference

- [1] Zhao, Y.; Truhlar, D. G. *Theor. Chem. Acc.* **2008**, *120*, 215–241.
- [2] Hariharan, P. C.; Pople, J. A. *Theor. Chim. Acta.* **1973**, *28*, 213-222.
- [3] Gaussian 16, Revision B.01, M. J. Frisch, G. W. Trucks, H. B. Schlegel, G. E. Scuseria, M. A. Robb, J. R. Cheeseman, G. Scalmani, V. Barone, G. A. Petersson, H. Nakatsuji, X. Li, M. Caricato, A. V. Marenich, J. Bloino, B. G. Janesko, R. Gomperts, B. Mennucci, H. P. Hratchian, J. V. Ortiz, A. F. Izmaylov, J. L. Sonnenberg, D. Williams-Young, F. Ding, F. Lipparini, F. Egidi, J. Goings, B. Peng, A. Petrone, T. Henderson, D. Ranasinghe, V. G. Zakrzewski, J. Gao, N. Rega, G. Zheng, W. Liang, M. Hada, M. Ehara, K. Toyota, R. Fukuda, . Hasegawa, M. Ishida, T. Nakajima, Y. Honda, O. Kitao, H. Nakai, T. Vreven, K. Throssell, J. A. Montgomery, Jr., J. E. Peralta, F. Ogliaro, M. J. Bearpark, J. J. Heyd, E. N. Brothers, K. N. Kudin, V. N. Staroverov, T. A. Keith, R. Kobayashi, J. Normand, K. Raghavachari, A. P. Rendell, J. C. Burant, S. S. Iyengar, J. Tomasi, M. Cossi, J. M. Millam, M. Klene, C. Adamo, R. Cammi, J. W. Ochterski, R. L. Martin, K. Morokuma, O. Farkas, J. B. Foresman, and D. J. Fox, Gaussian, Inc., Wallingford CT, 2016.

## 10. Copies of <sup>1</sup>H NMR, <sup>13</sup>C NMR, <sup>19</sup>F NMR and HRMS spectra

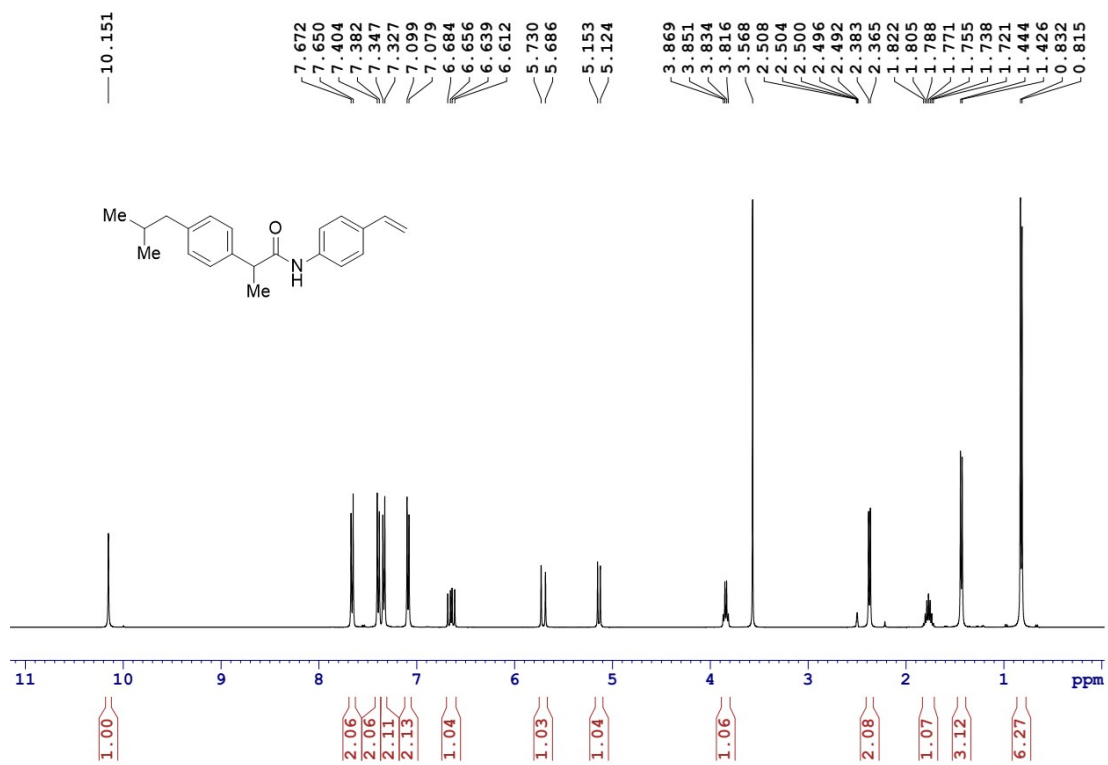

**3aq'**- $^1\text{H}$  NMR (400 MHz, DMSO- $d_6$ )

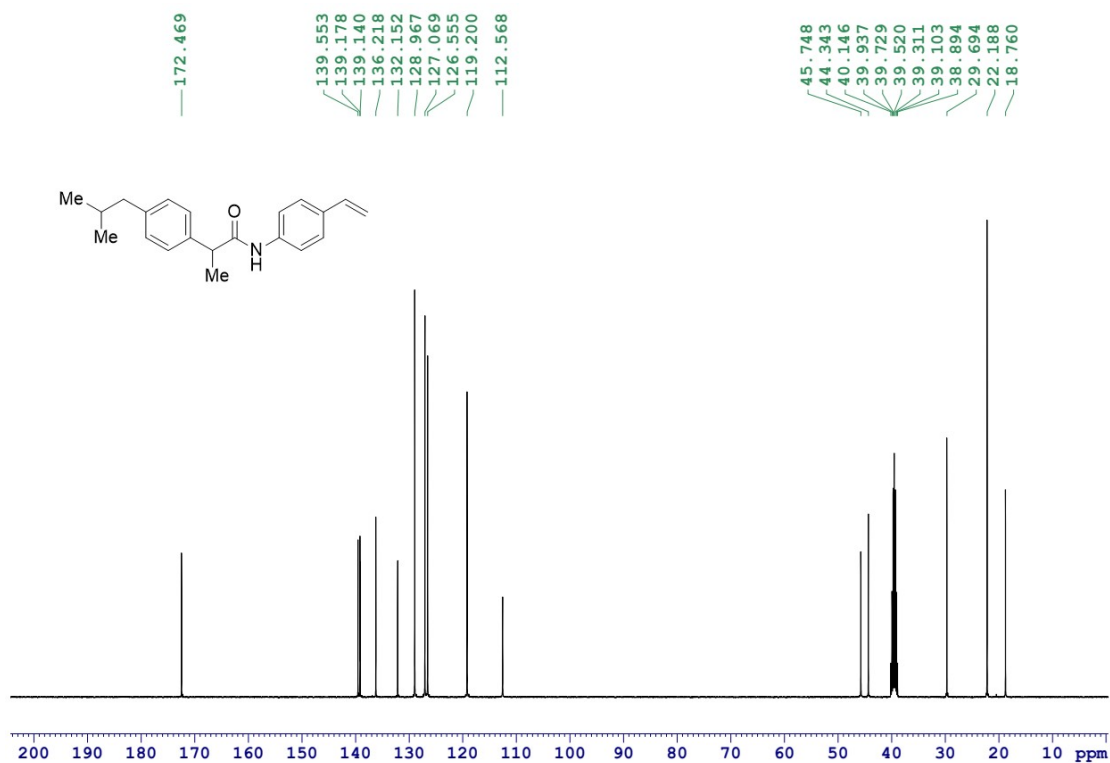

**3aq'**- $^{13}\text{C}$  NMR (100 MHz, DMSO- $d_6$ )





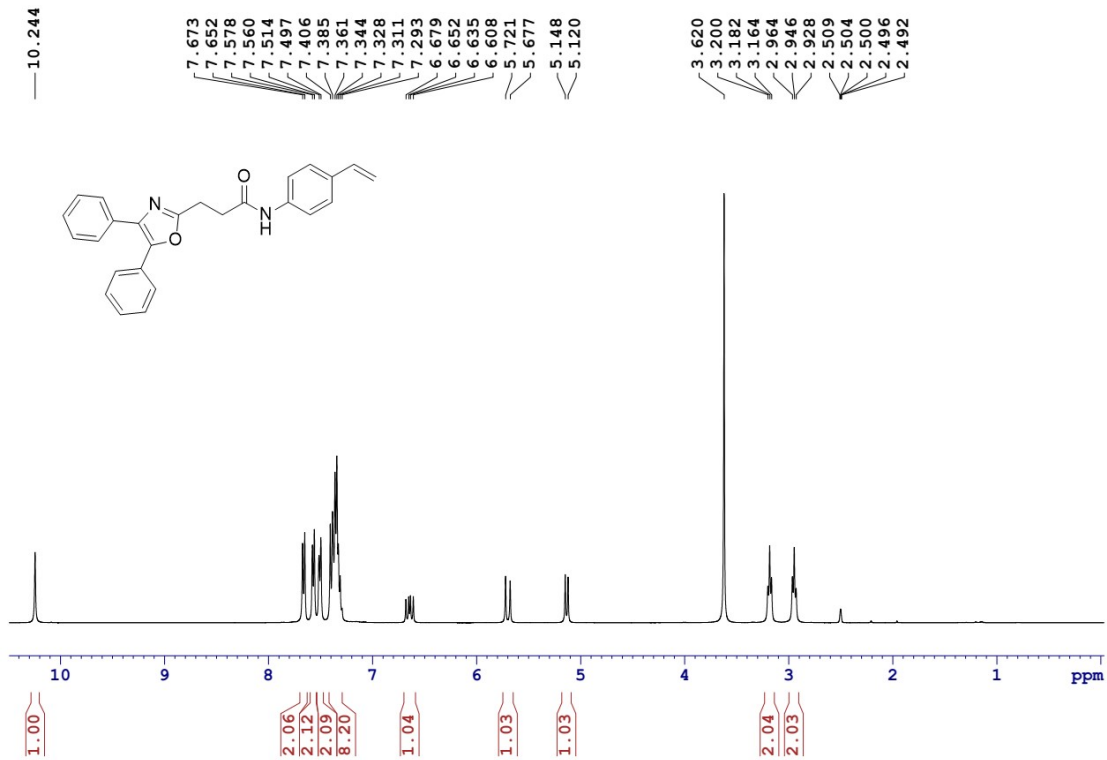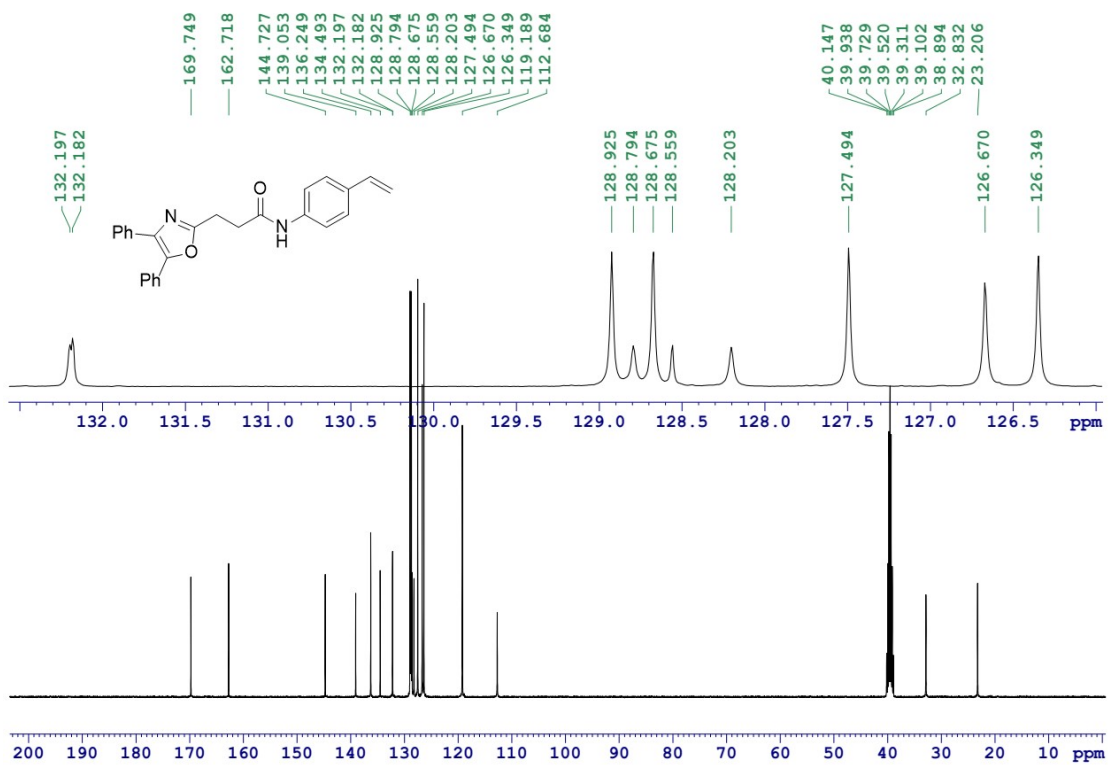

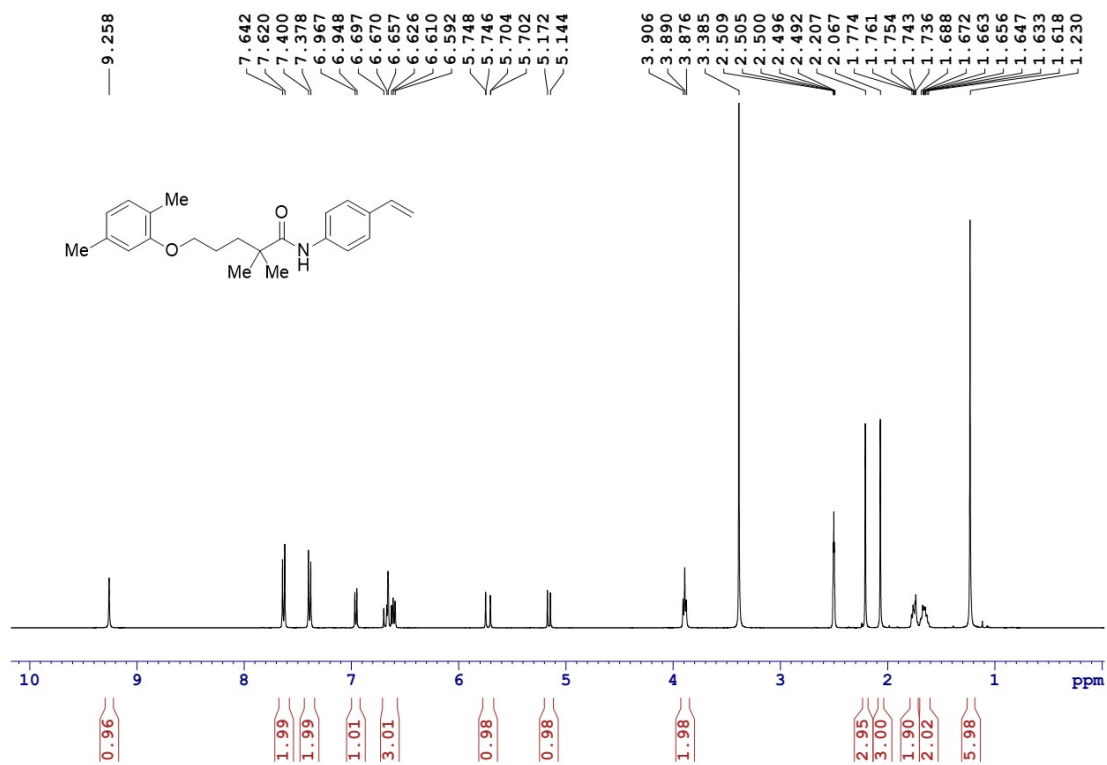

**3at'**-<sup>1</sup>H NMR (400 MHz, DMSO-*d*<sub>6</sub>)

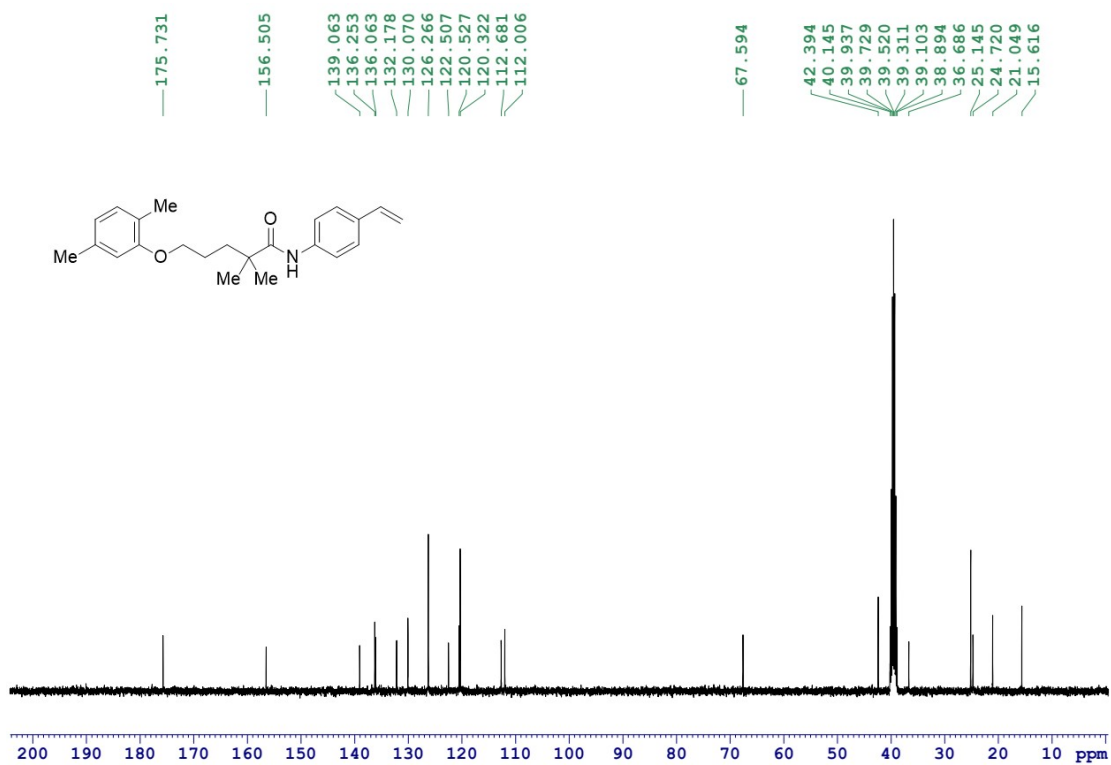

**3at'**-<sup>13</sup>C NMR (100 MHz, DMSO-*d*<sub>6</sub>)

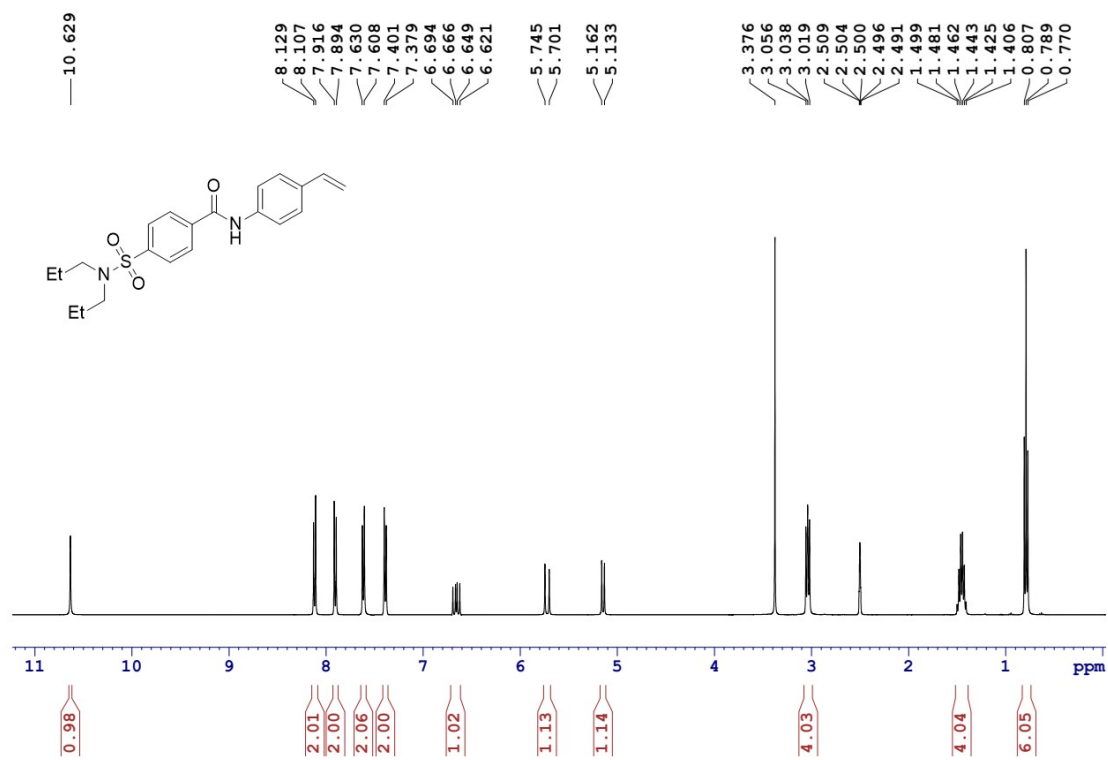

**3au'**- $^1\text{H}$  NMR (400 MHz,  $\text{DMSO-}d_6$ )

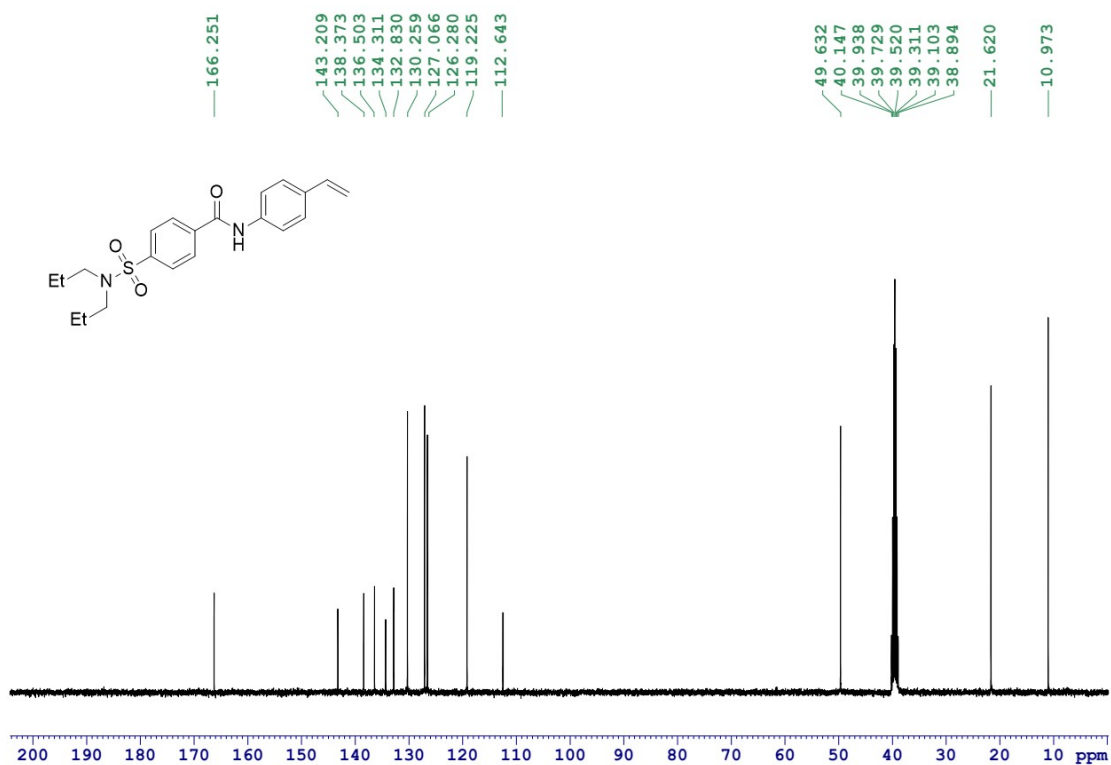

**3au'**- $^{13}\text{C}$  NMR (100 MHz,  $\text{DMSO-}d_6$ )

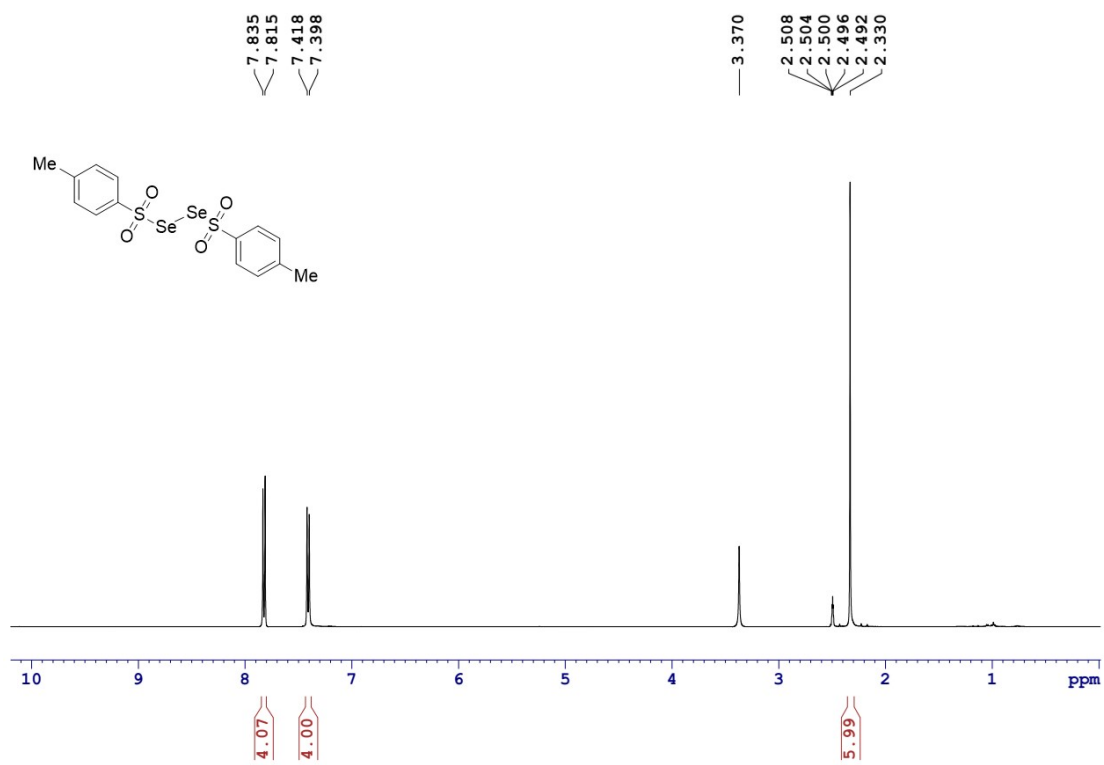

**2a-I- $^1\text{H}$  NMR (400 MHz,  $\text{DMSO-}d_6$ )**

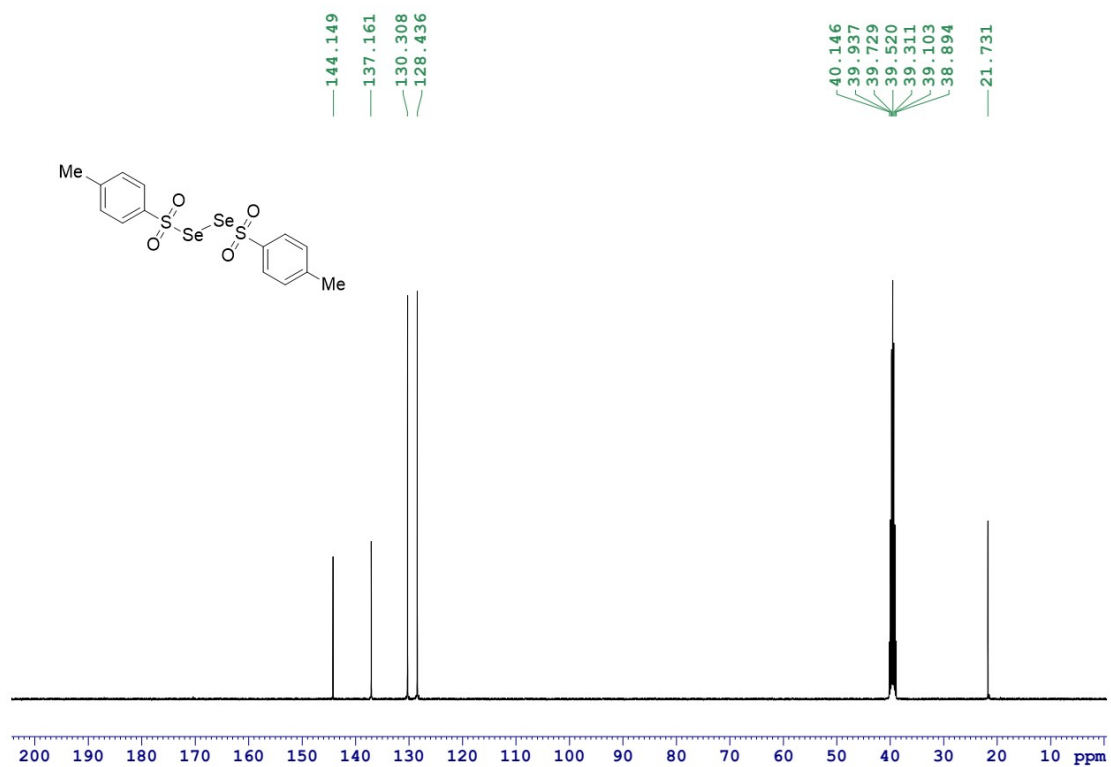

**2a-I- $^{13}\text{C}$  NMR (100 MHz,  $\text{DMSO-}d_6$ )**

ZH-14 #47 RT: 0.46 AV: 1 NL: 1.13E9  
T: FTMS + p ESI Full ms [100.0000-1300.0000]

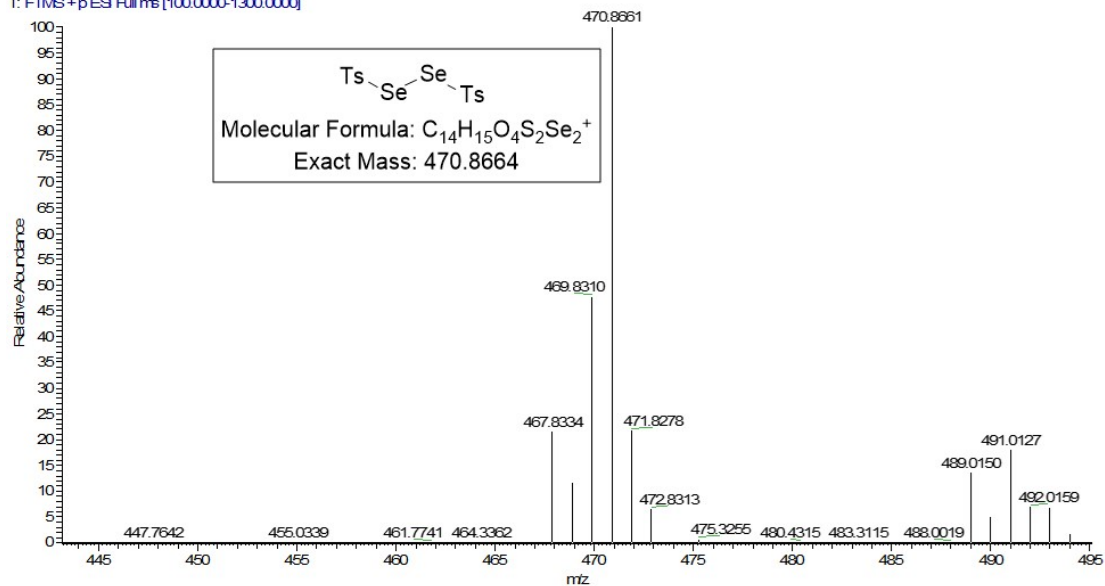

2a-I-HRMS

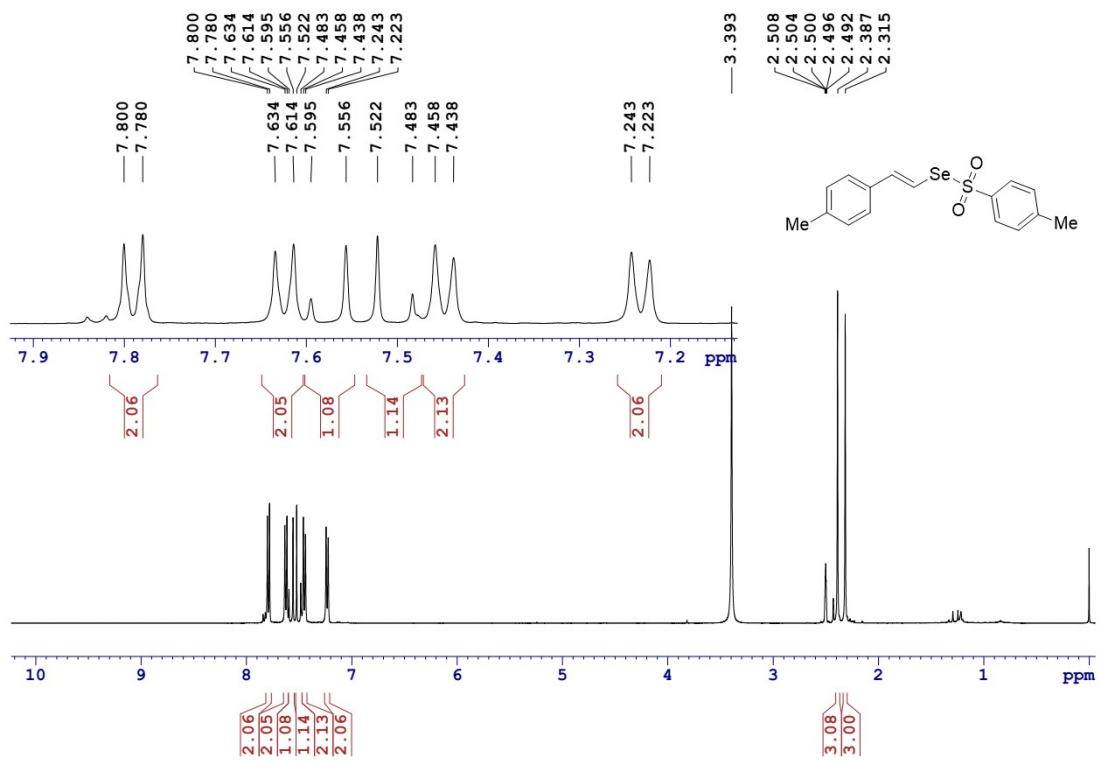

3aa-<sup>1</sup>H NMR (400 MHz, DMSO-d<sub>6</sub>)

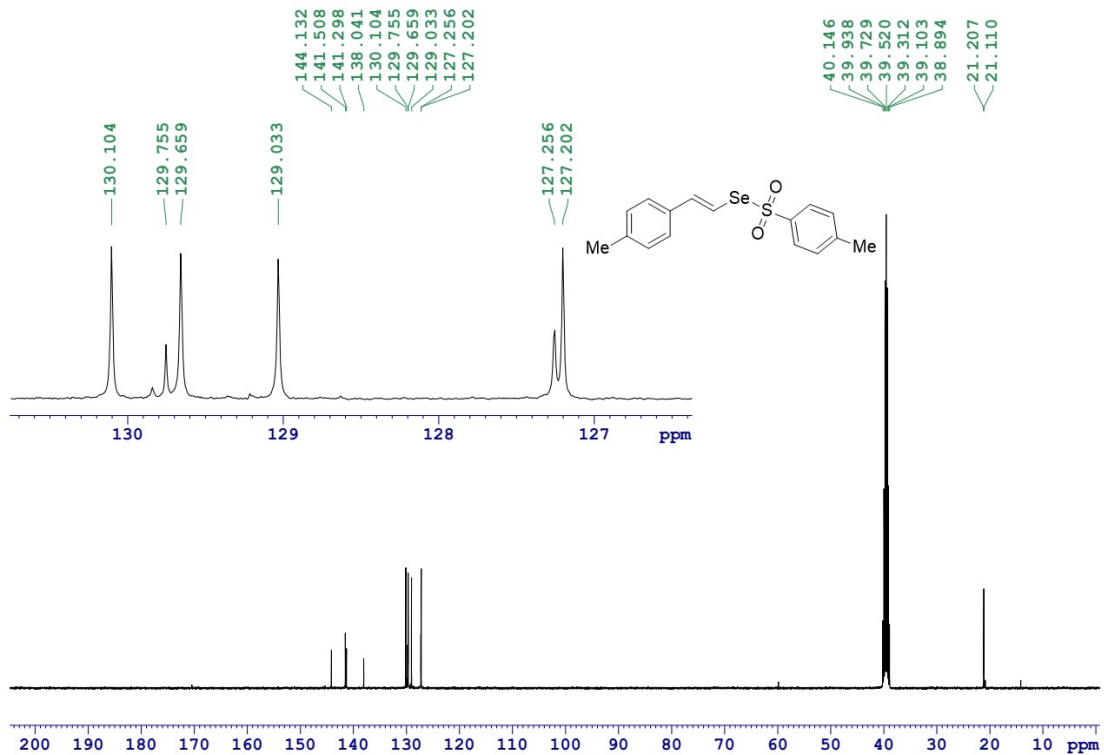

**3aa- $^{13}\text{C}$  NMR (100 MHz, DMSO- $d_6$ )**

14S±29 RT: 0.29 AV: 1 NL: 3.30E7  
T: FTMS+p ESI Full ms [100.0000-1300.0000]

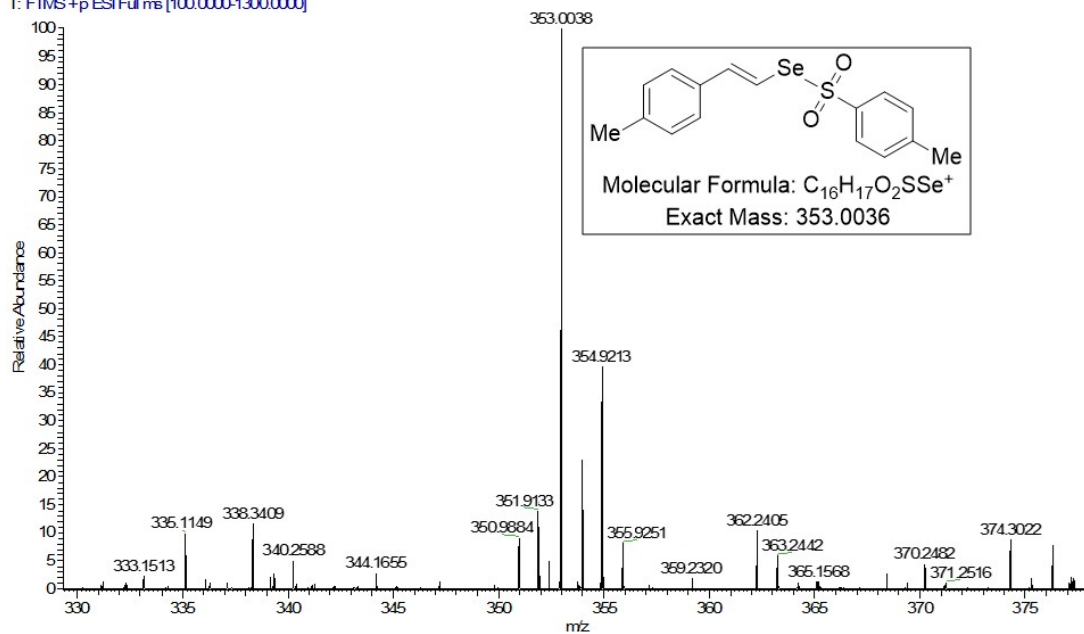

**3aa-HRMS**

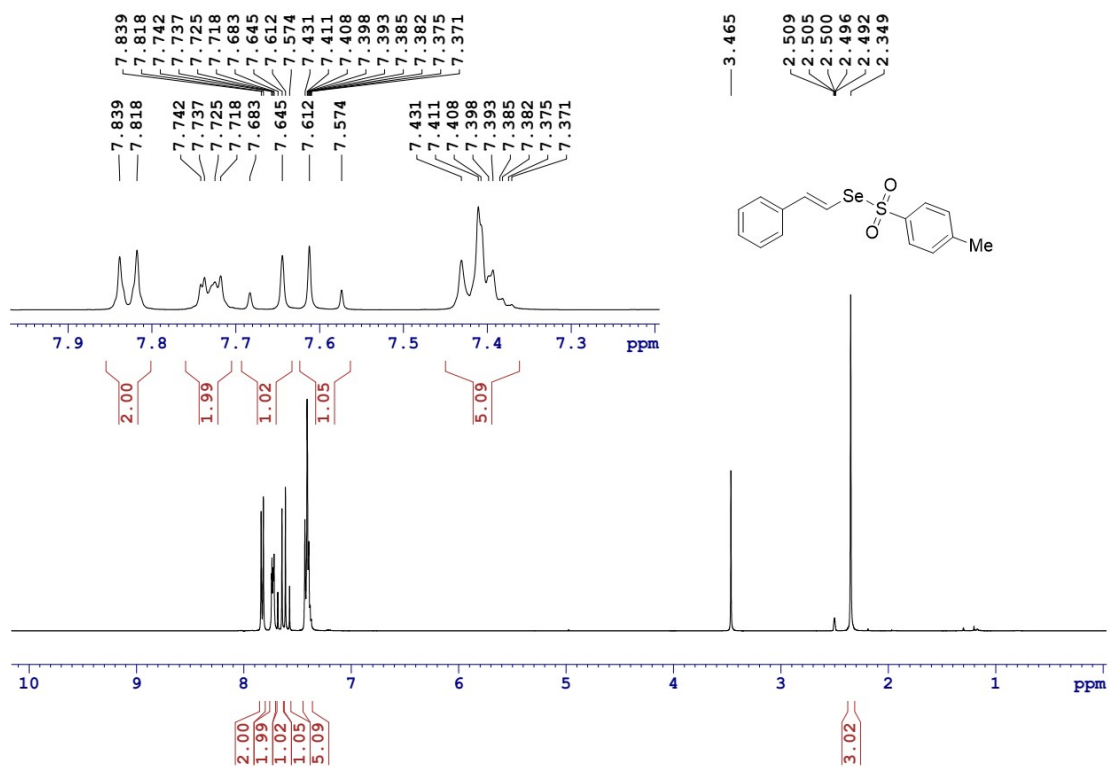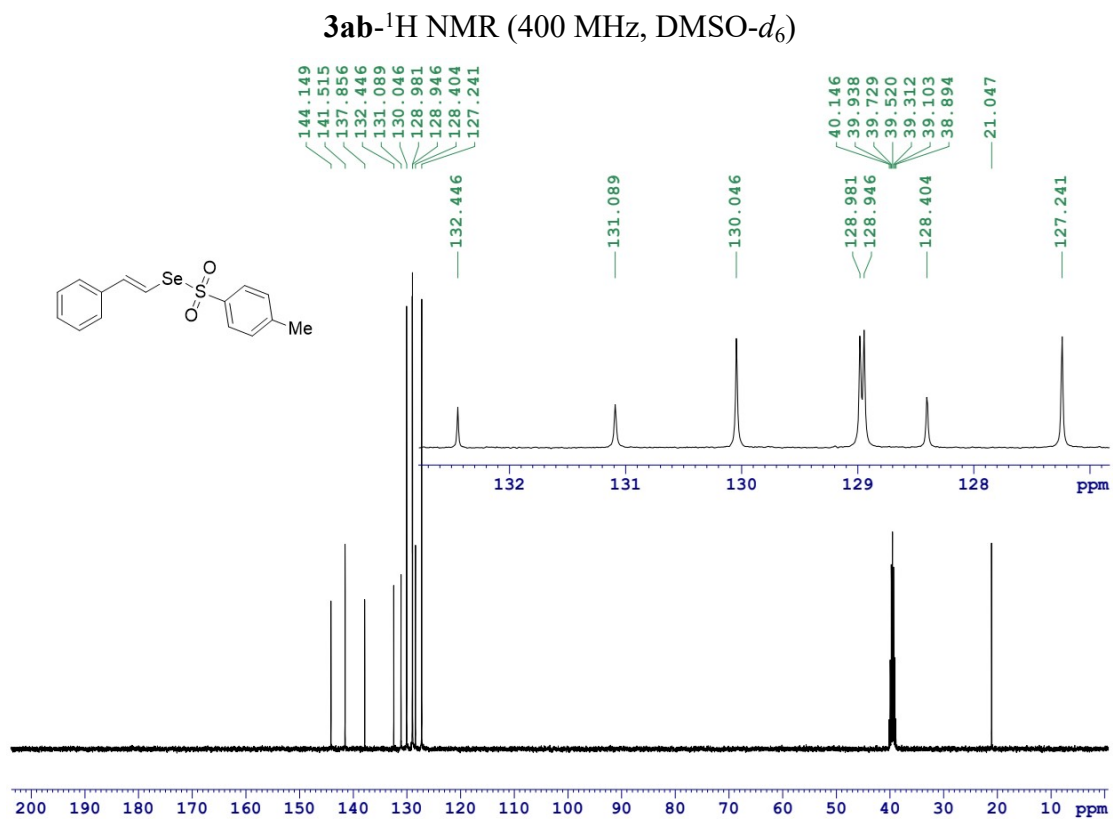



151#:39 RT: 0.39 AV: 1 NL: 1.91EB  
T: FTMS+p ESI Full ms [100.0000-1300.0000]

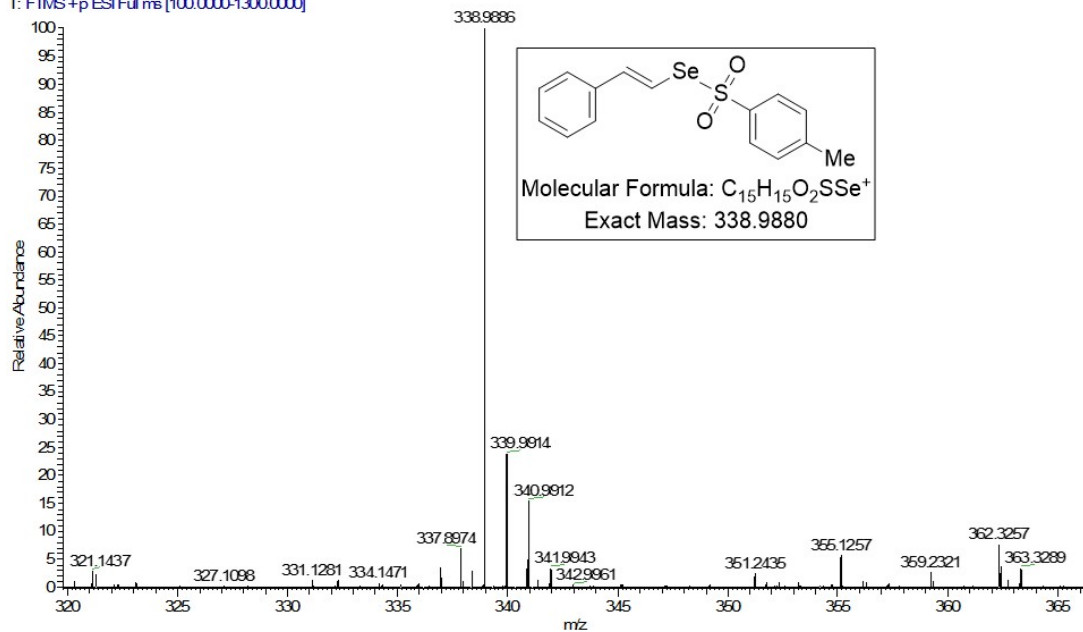

**3ab**-HRMS

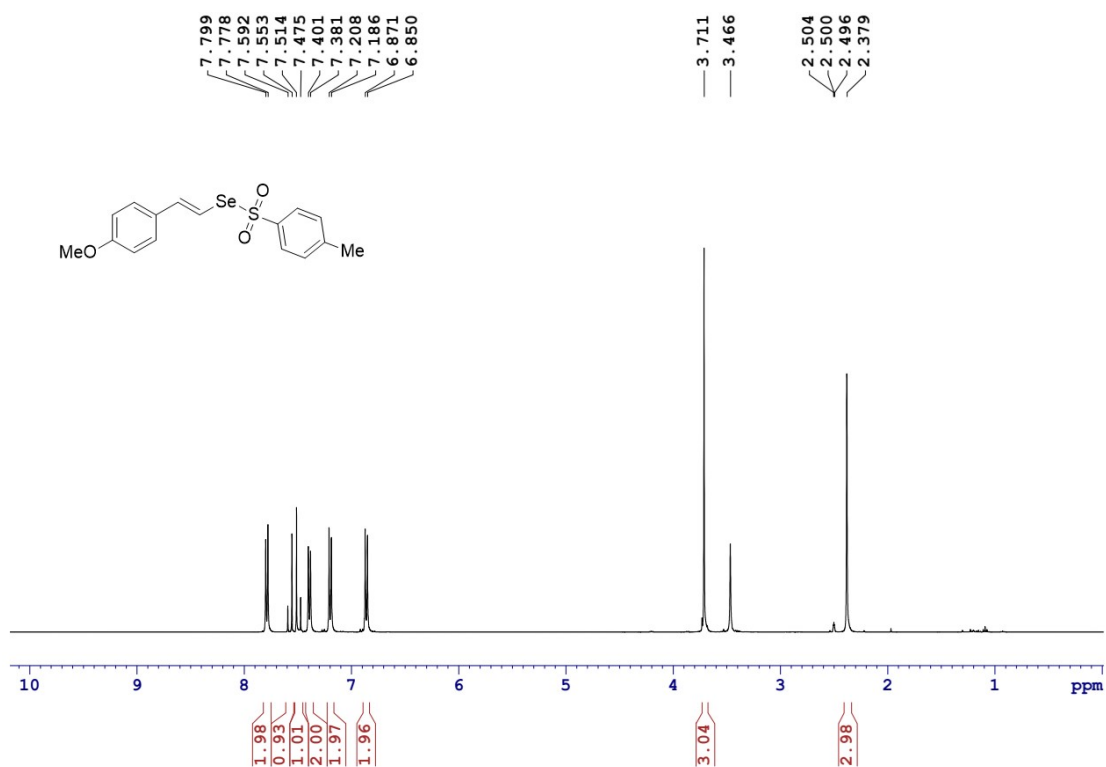

**3ac**- $^1H$  NMR (400 MHz, DMSO- $d_6$ )

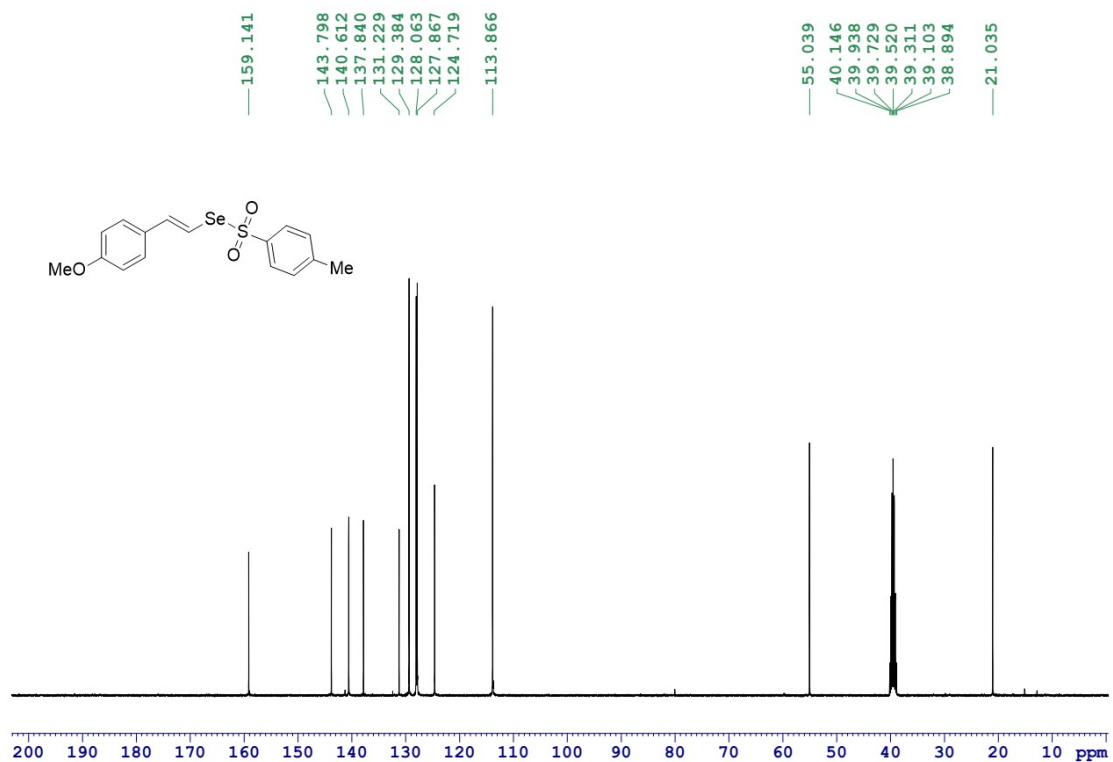

**3ac**- $^{13}\text{C}$  NMR (100 MHz,  $\text{DMSO-}d_6$ )

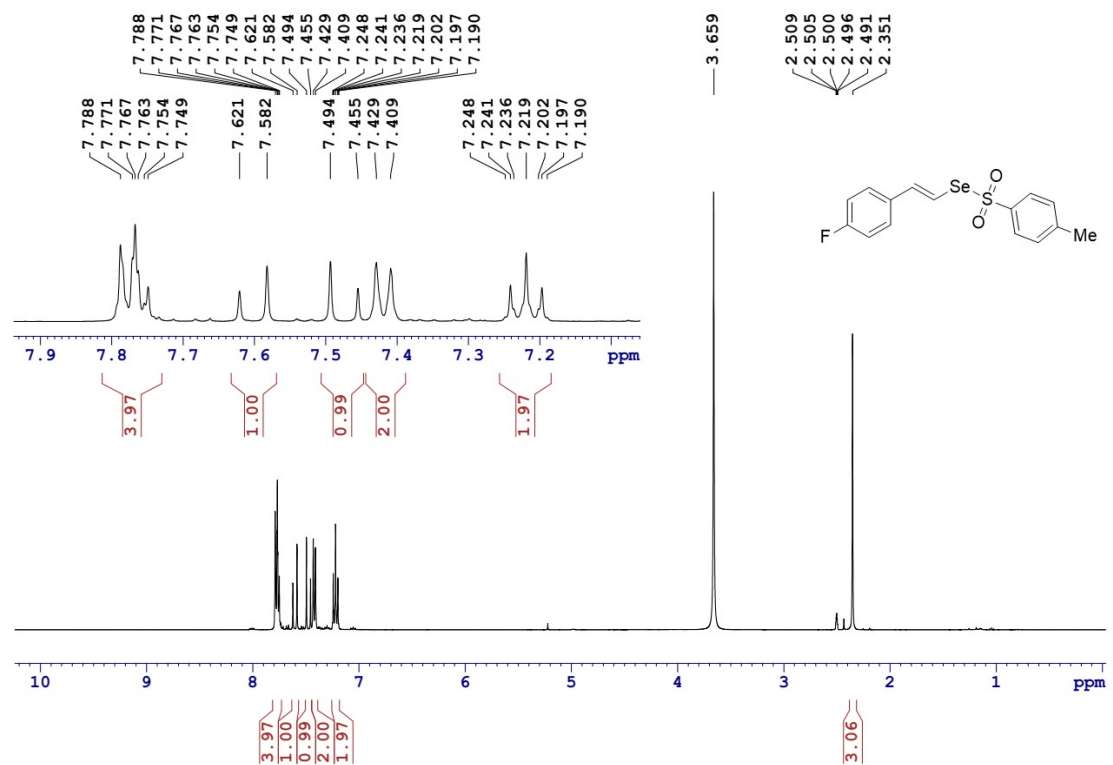

**3ad**- $^1\text{H}$  NMR (400 MHz,  $\text{DMSO-}d_6$ )

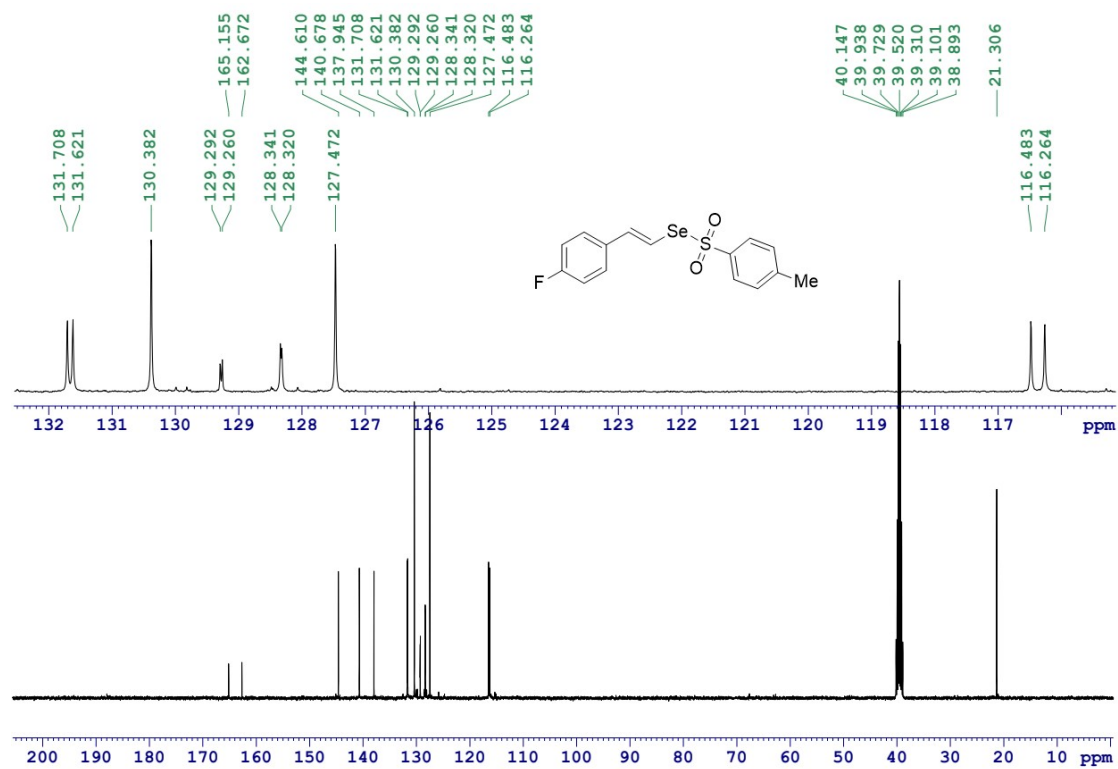

**3ad**-<sup>13</sup>C NMR (100 MHz, DMSO-*d*<sub>6</sub>)

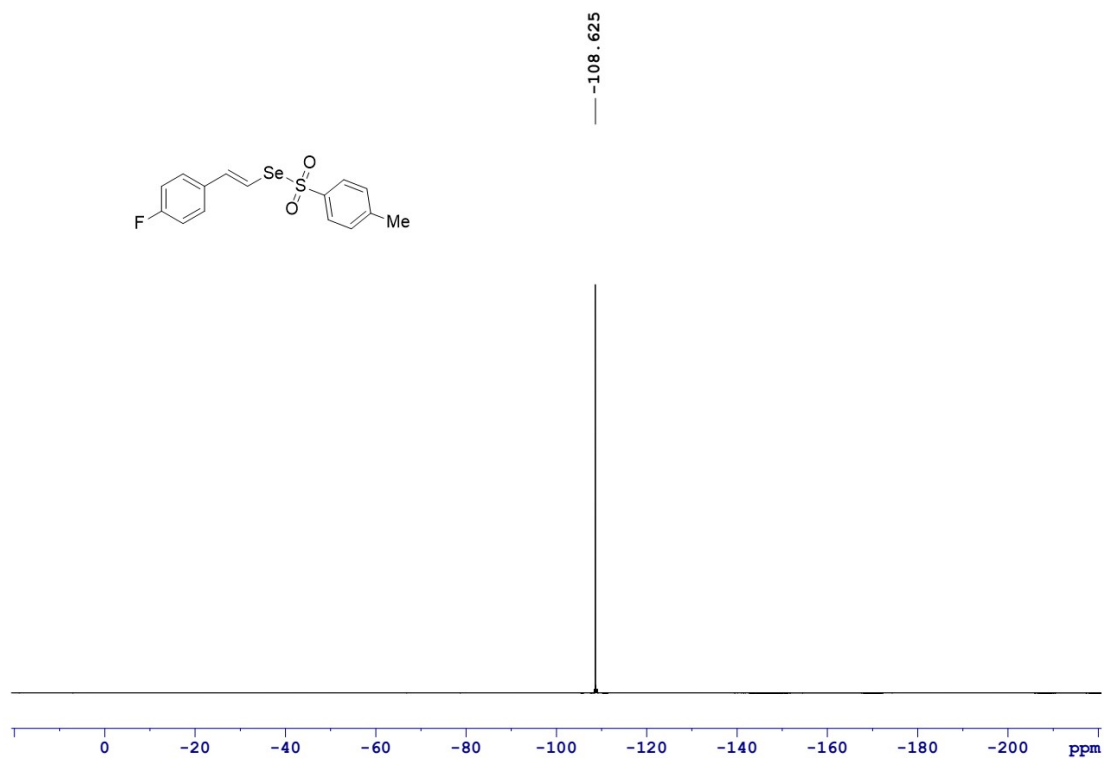

**3ad**-<sup>19</sup>F NMR (376.8 MHz, DMSO-*d*<sub>6</sub>)

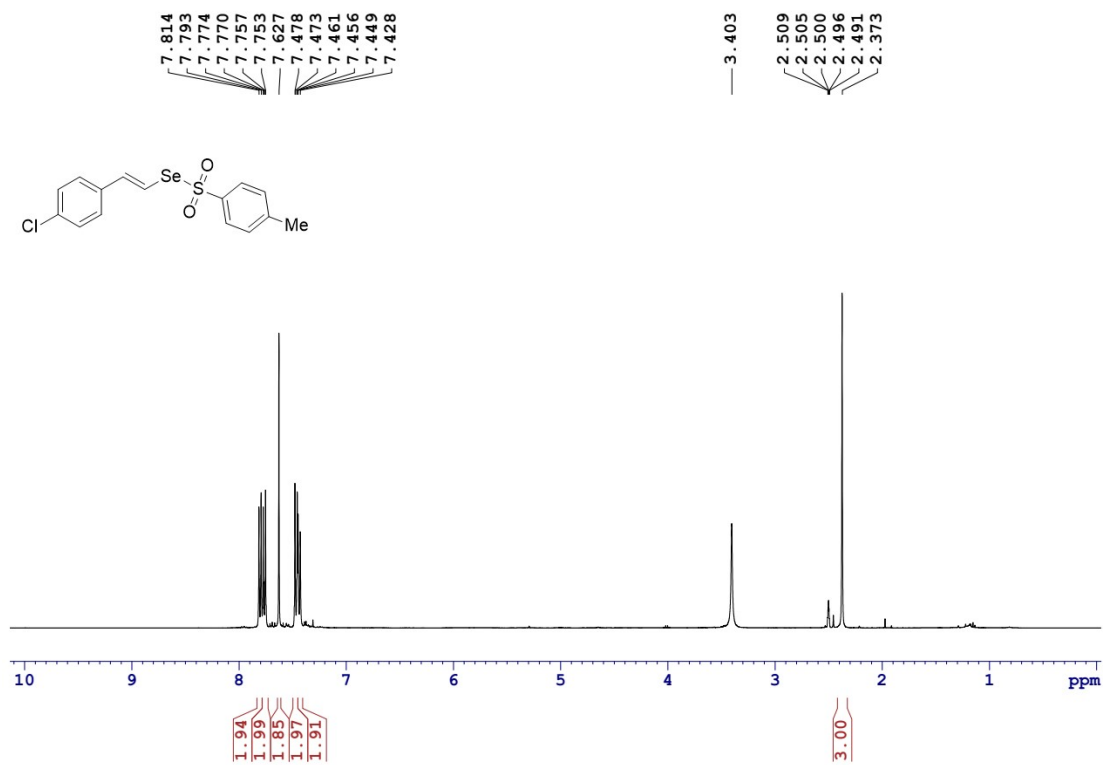

**3ae**- $^1\text{H}$  NMR (400 MHz, DMSO- $d_6$ )

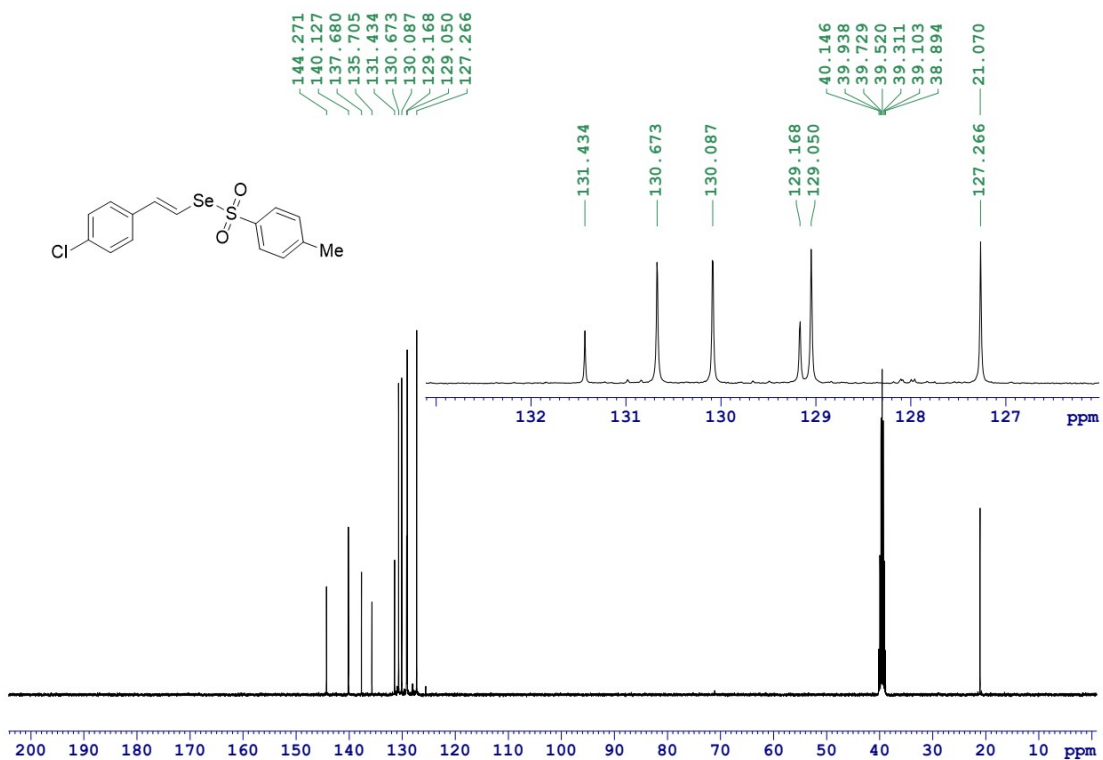

**3ae**- $^{13}\text{C}$  NMR (100 MHz, DMSO- $d_6$ )

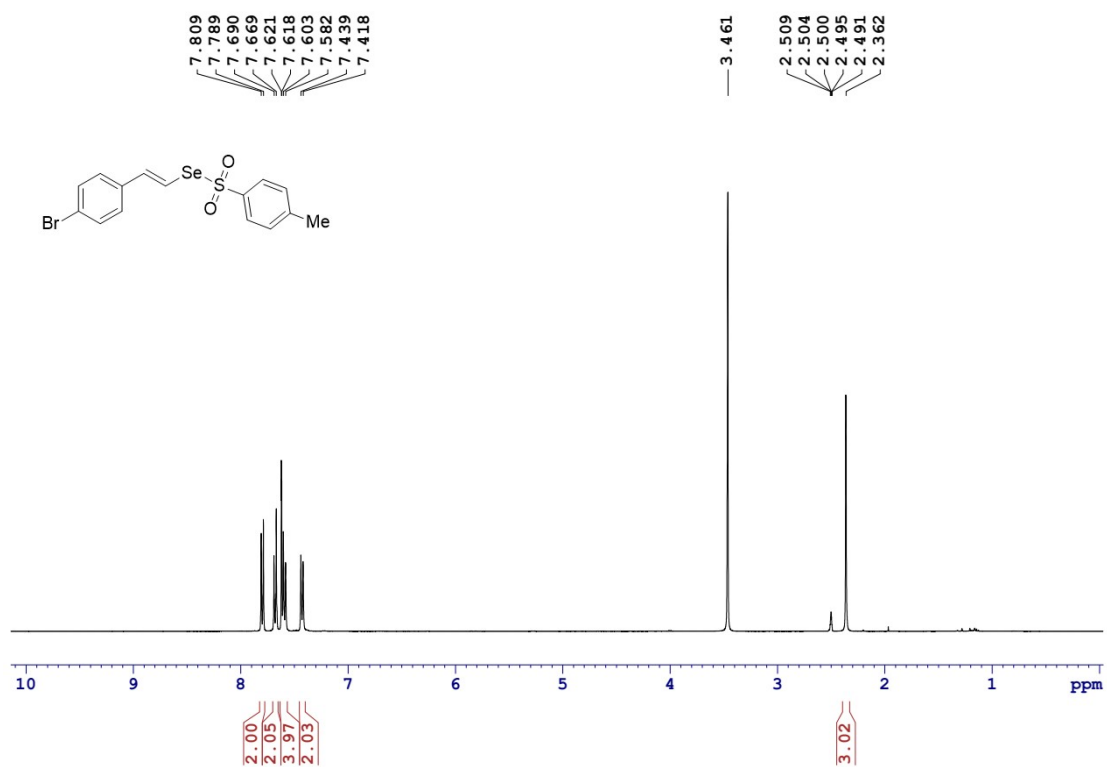

**3af**- $^1\text{H}$  NMR (400 MHz,  $\text{DMSO-}d_6$ )

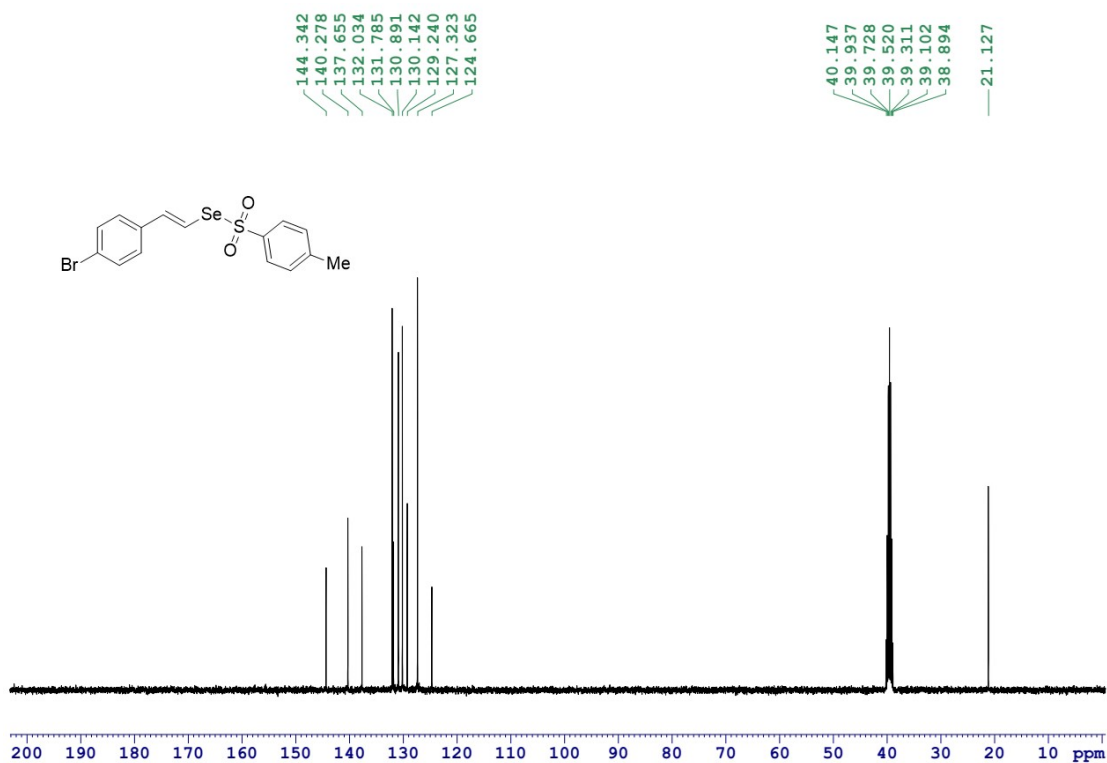

**3af**- $^{13}\text{C}$  NMR (100 MHz,  $\text{DMSO-}d_6$ )

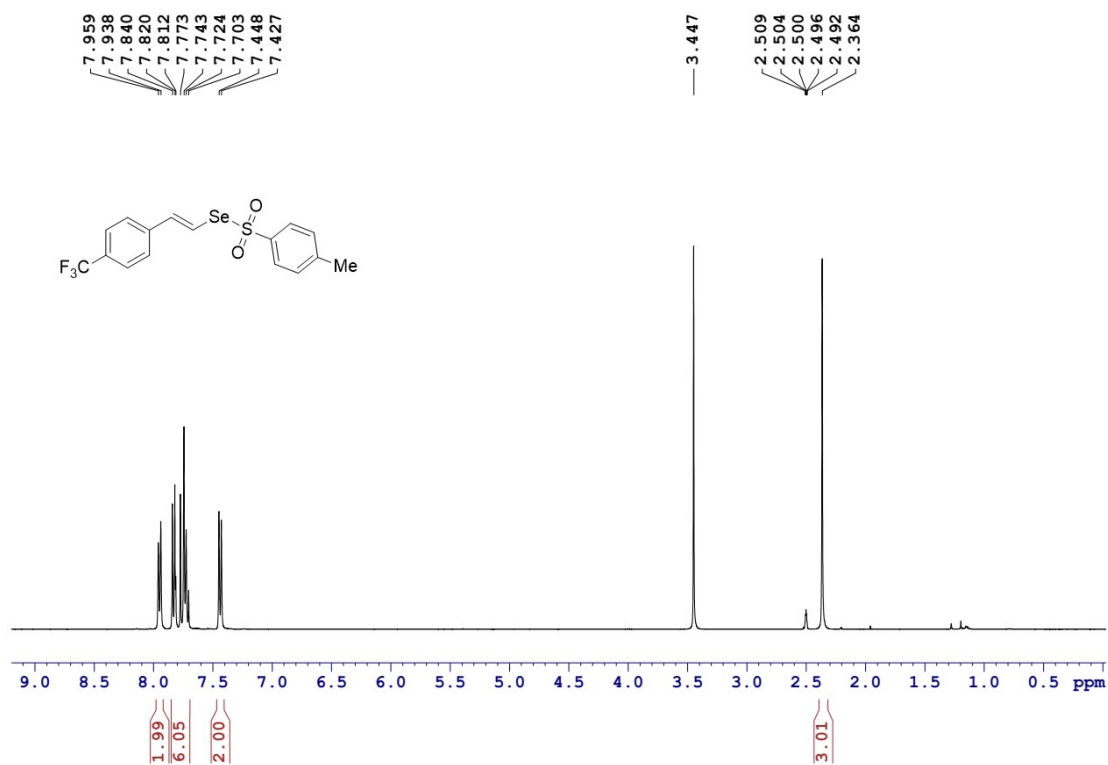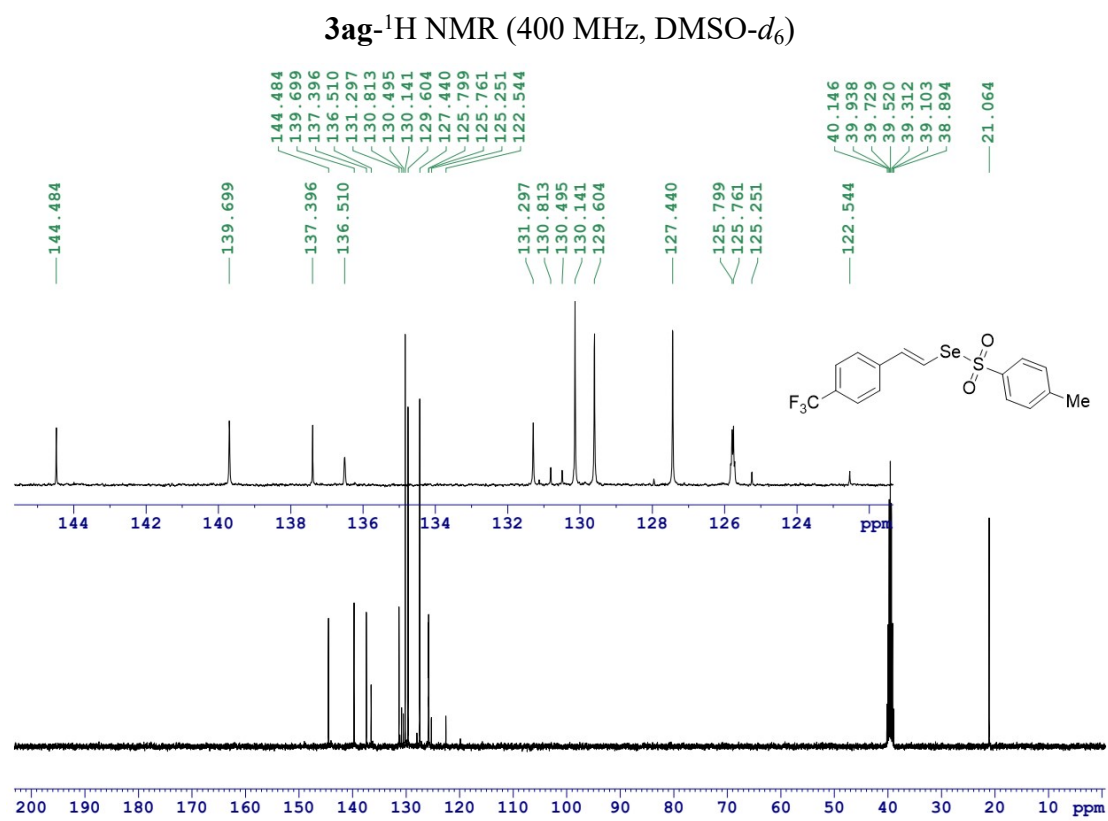

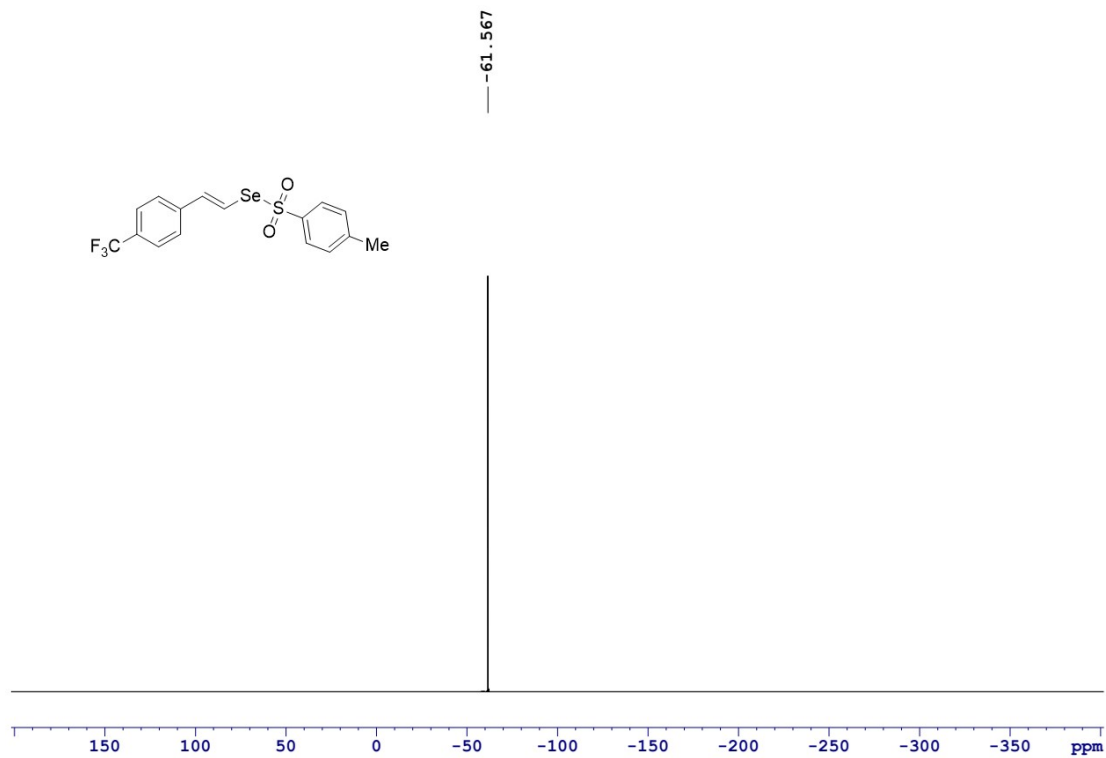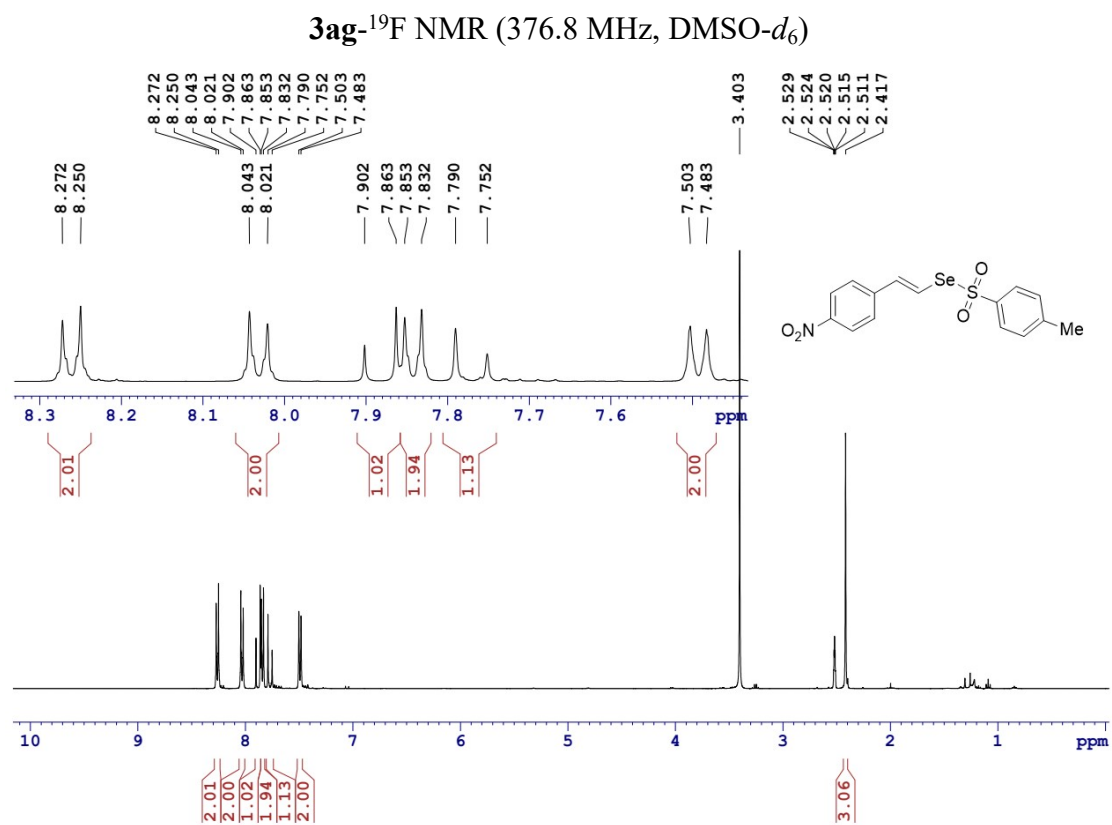

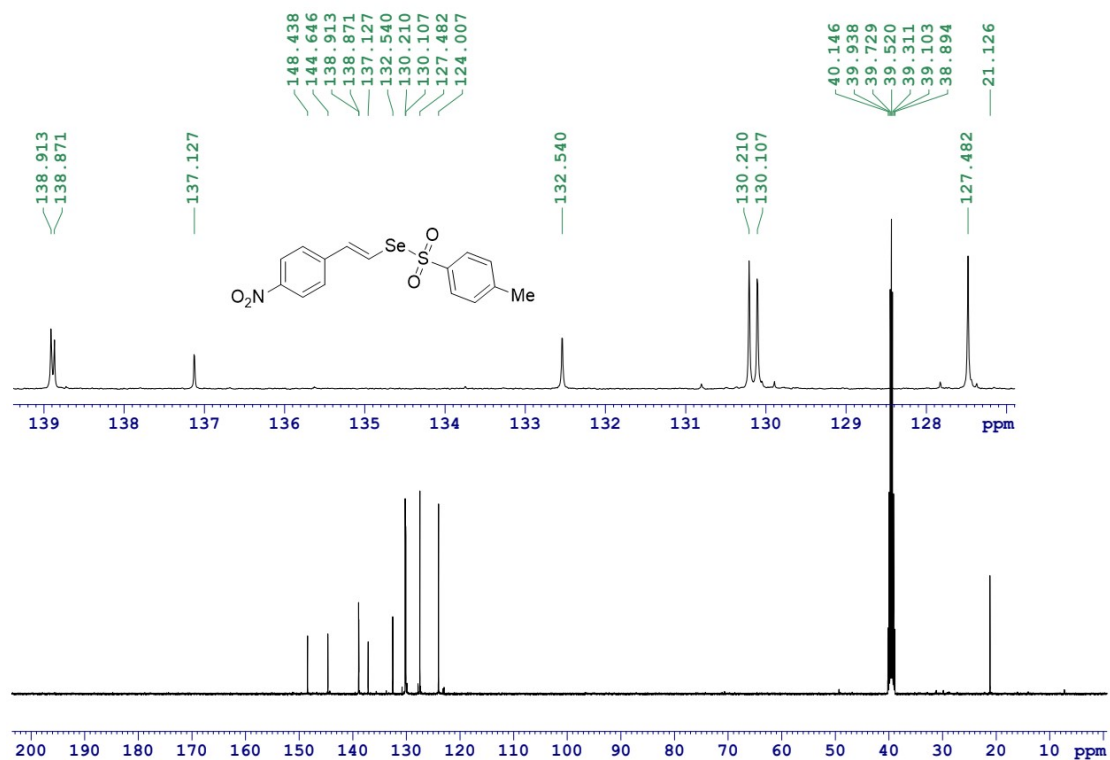

**3ah**-<sup>13</sup>C NMR (100 MHz, DMSO-*d*<sub>6</sub>)

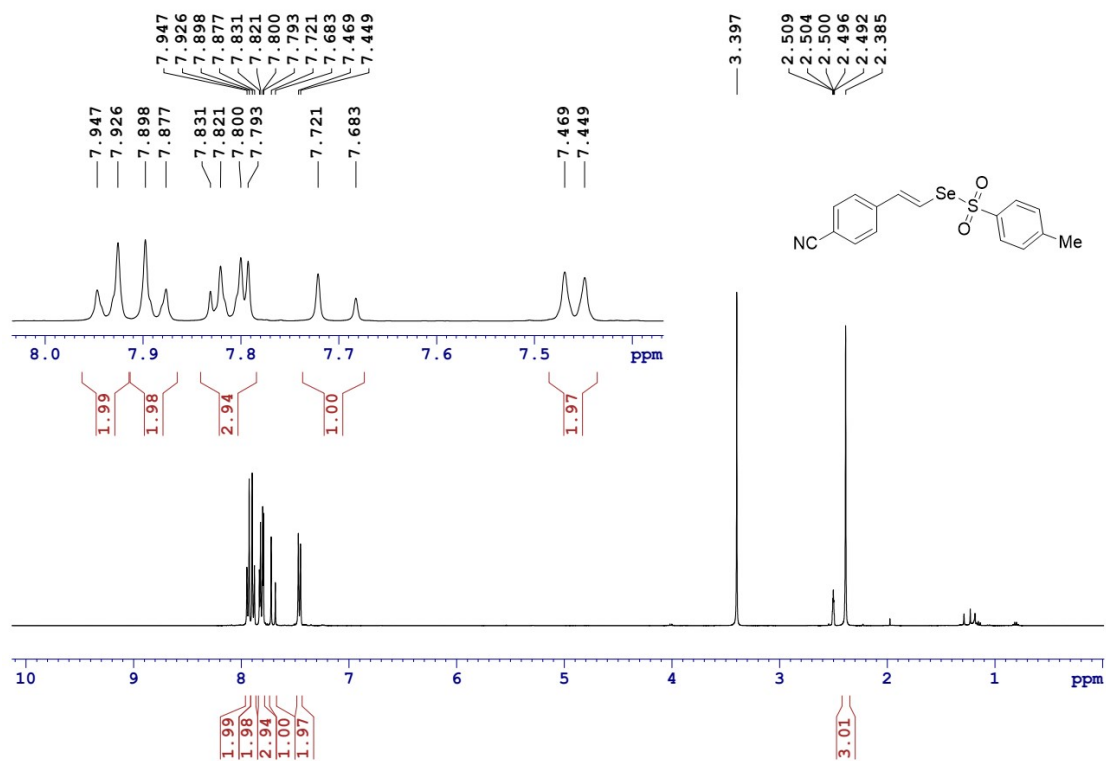

**3ai**-<sup>1</sup>H NMR (400 MHz, DMSO-*d*<sub>6</sub>)



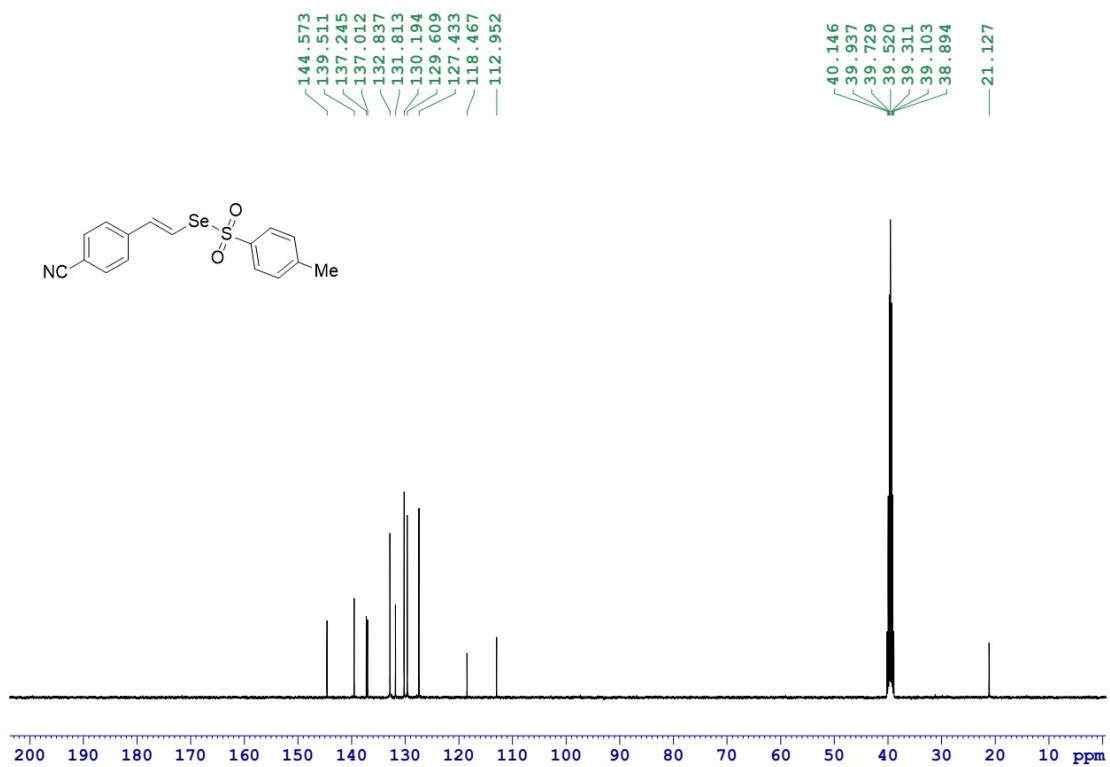

**3ai**- $^{13}\text{C}$  NMR (100 MHz,  $\text{DMSO-}d_6$ )

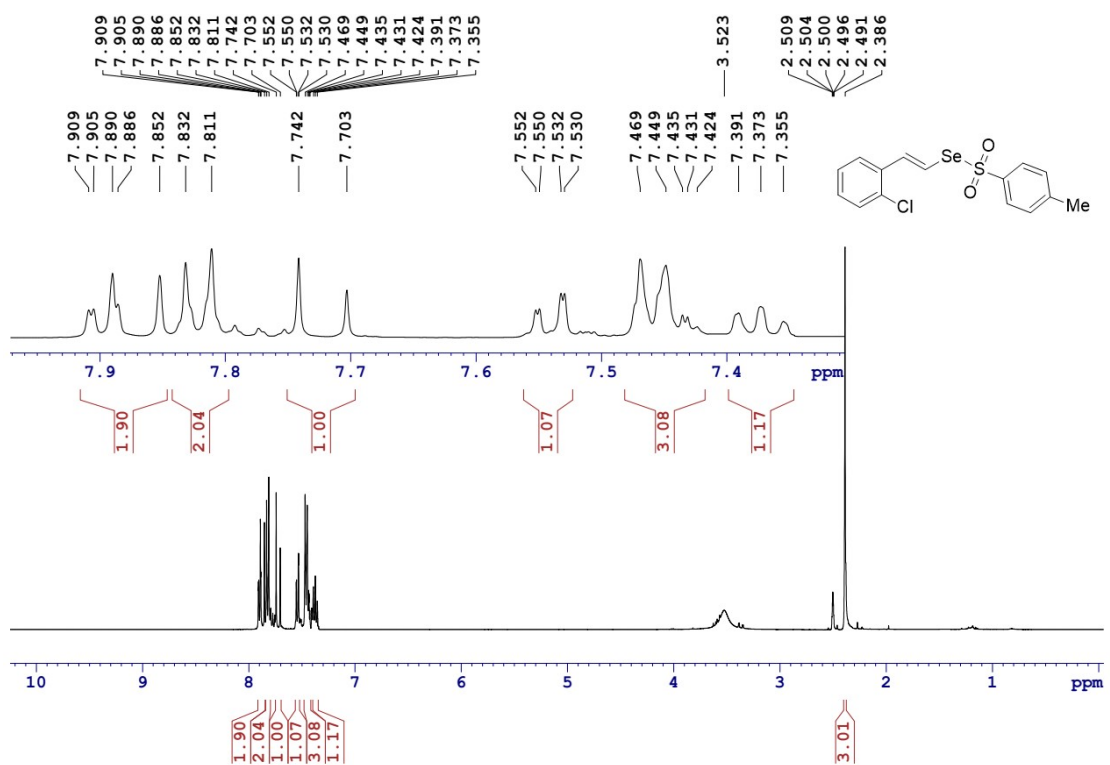

**3aj**- $^1\text{H}$  NMR (400 MHz,  $\text{DMSO-}d_6$ )

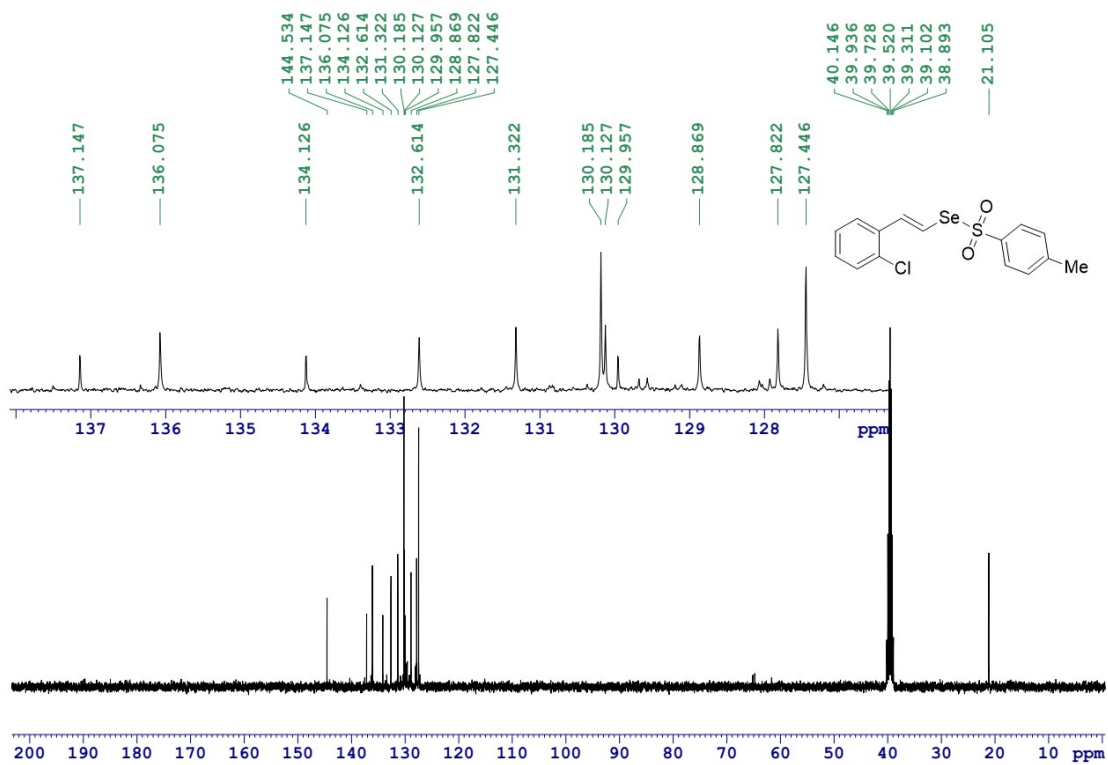

**3aj**- $^{13}\text{C}$  NMR (100 MHz,  $\text{DMSO-}d_6$ )

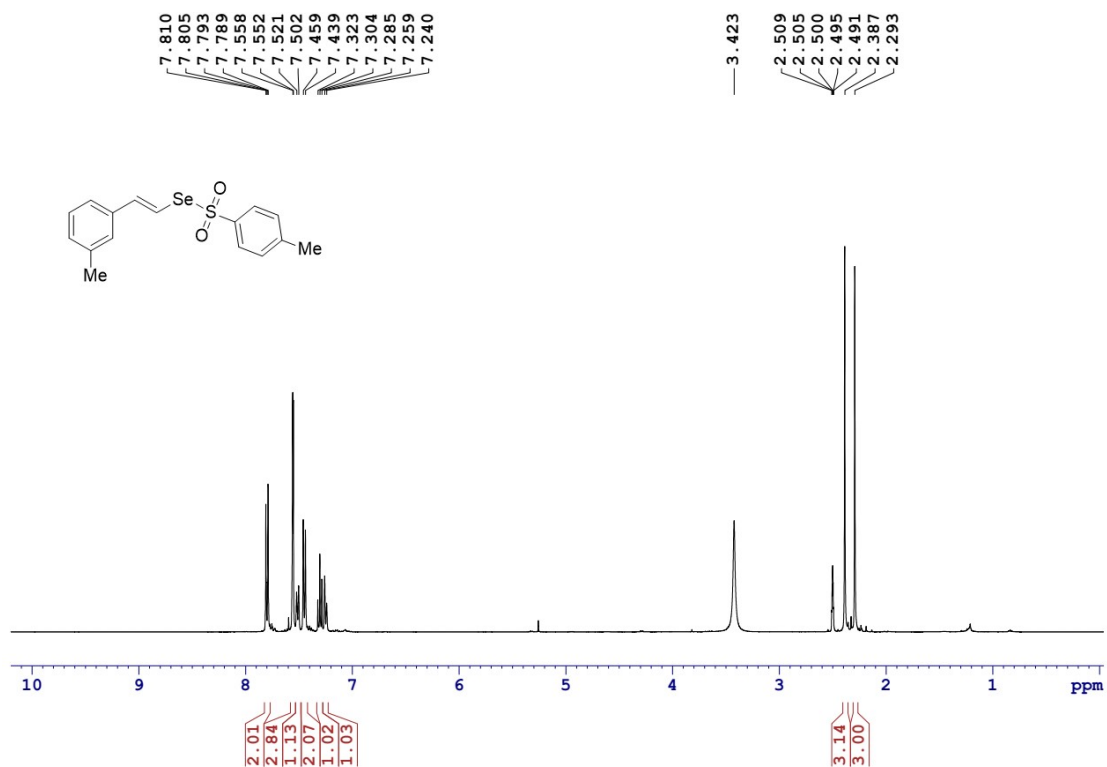

**3ak**- $^1\text{H}$  NMR (400 MHz,  $\text{DMSO-}d_6$ )

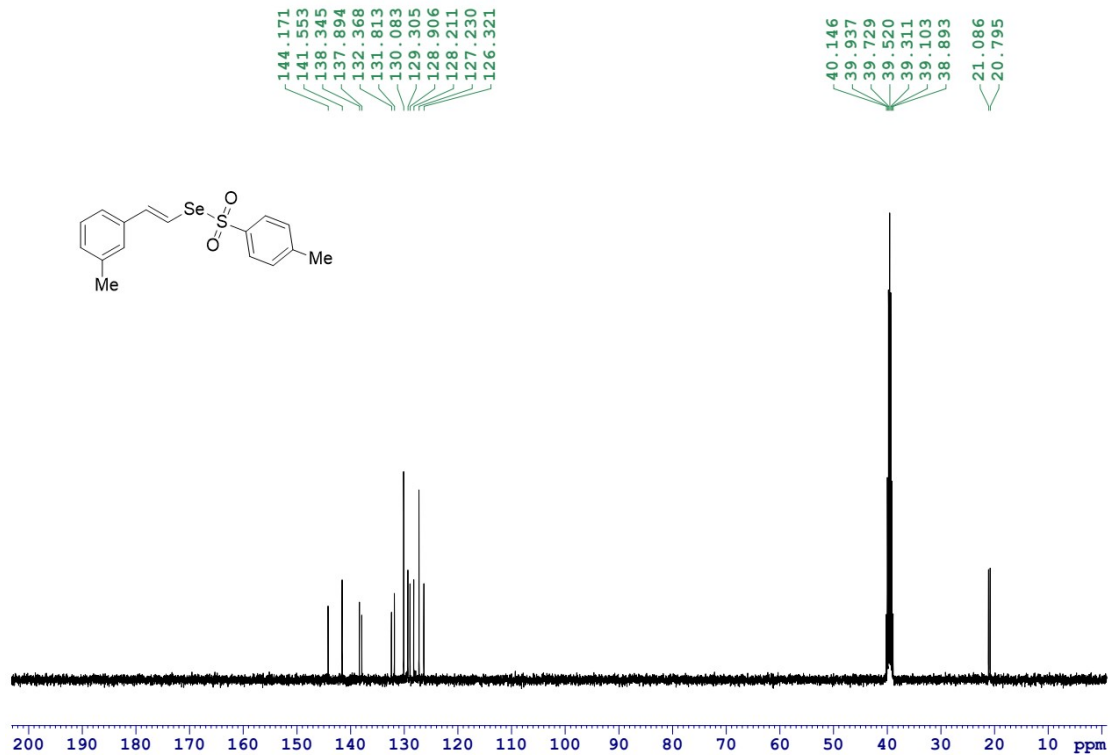

3ak- $^{13}\text{C}$  NMR (100 MHz, DMSO- $d_6$ )

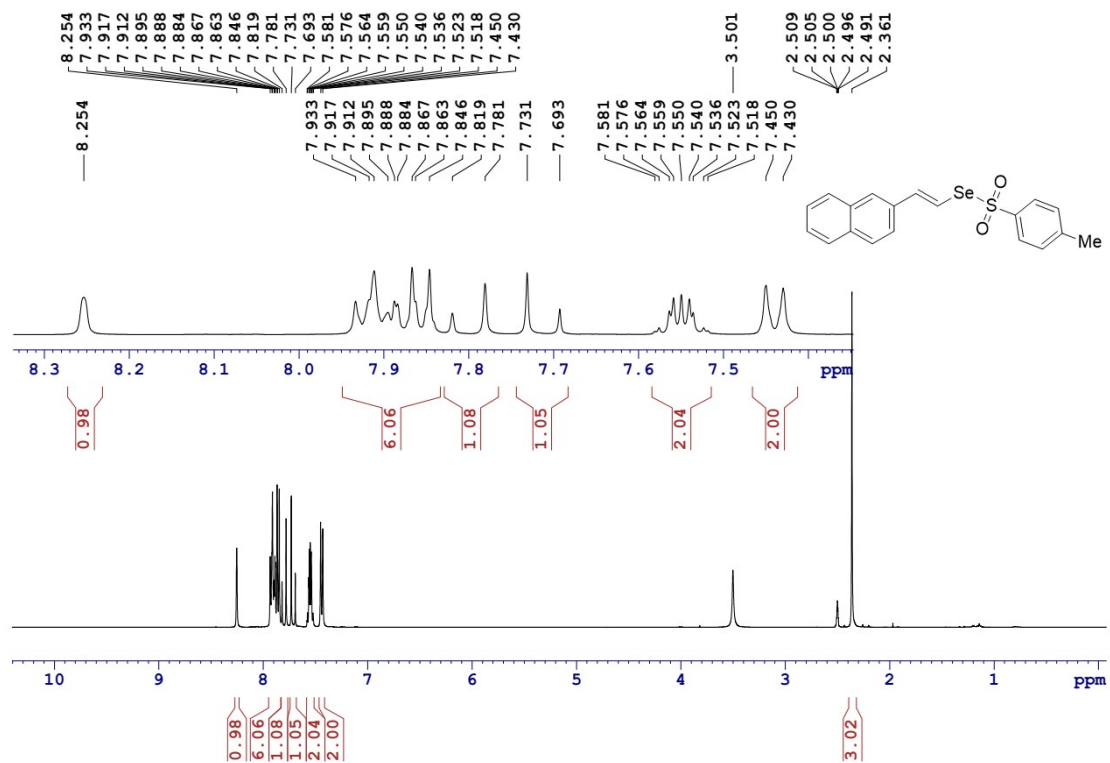

3al- $^1\text{H}$  NMR (400 MHz, DMSO- $d_6$ )

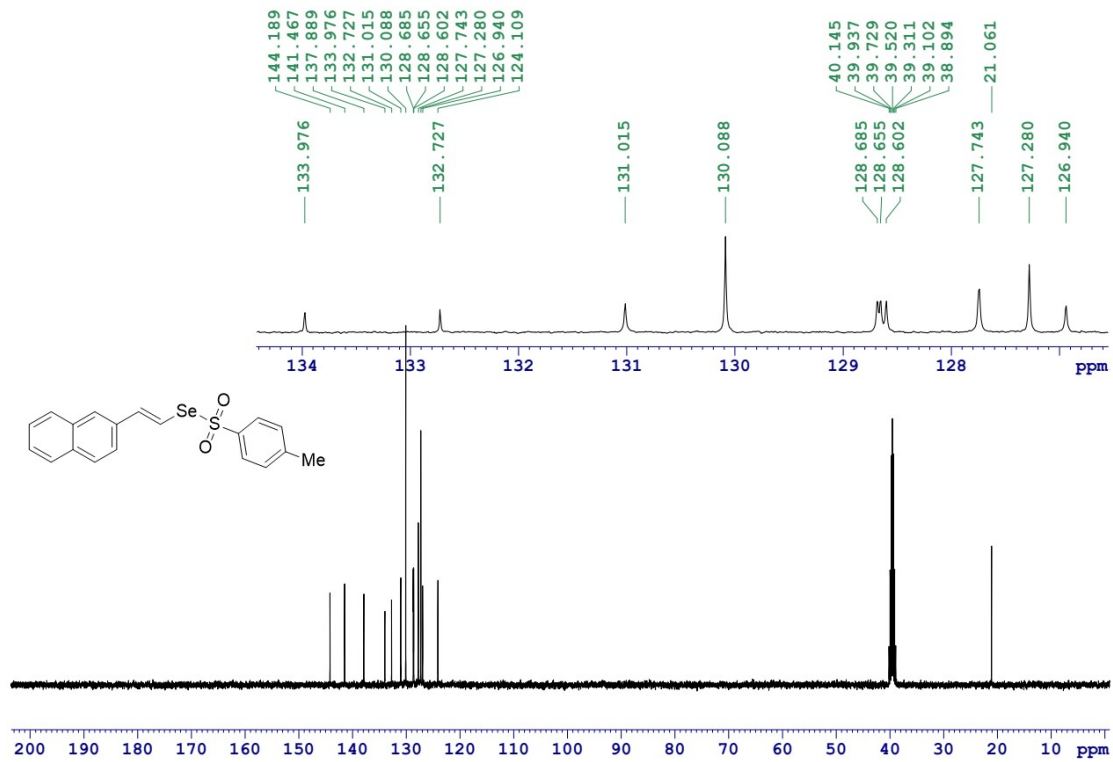

**3al**- $^{13}\text{C}$  NMR (100 MHz, DMSO- $d_6$ )

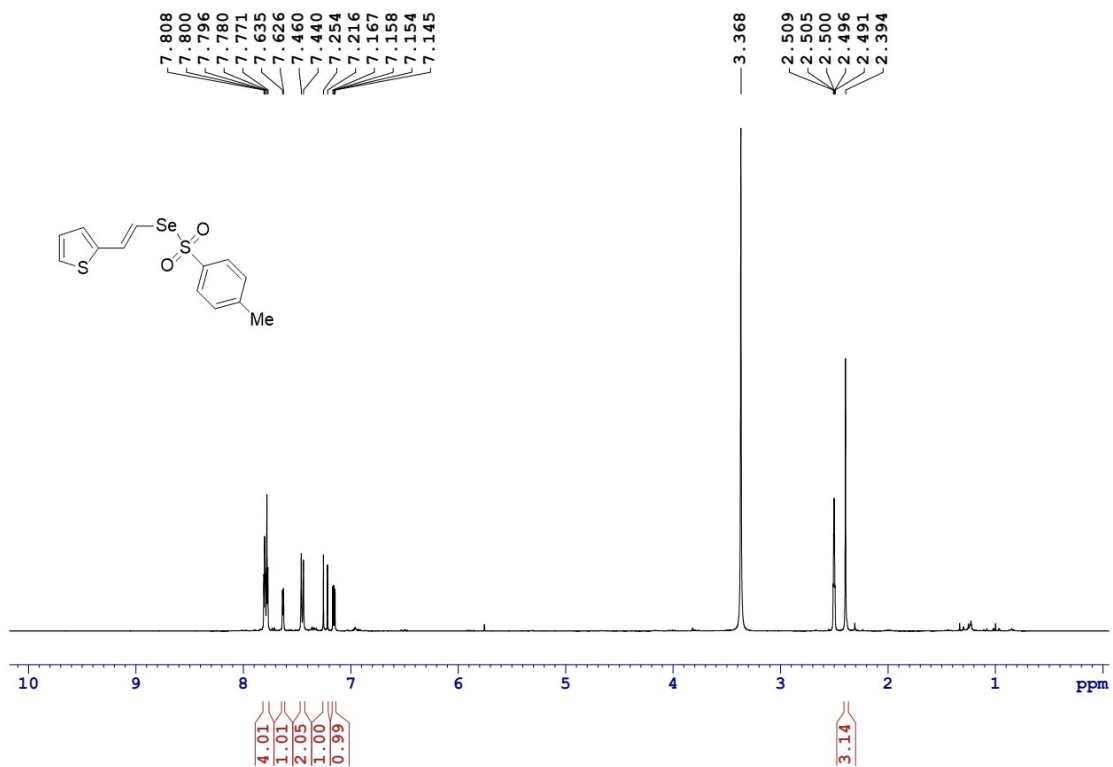

**3am**- $^{13}\text{C}$  NMR (100 MHz, DMSO- $d_6$ )

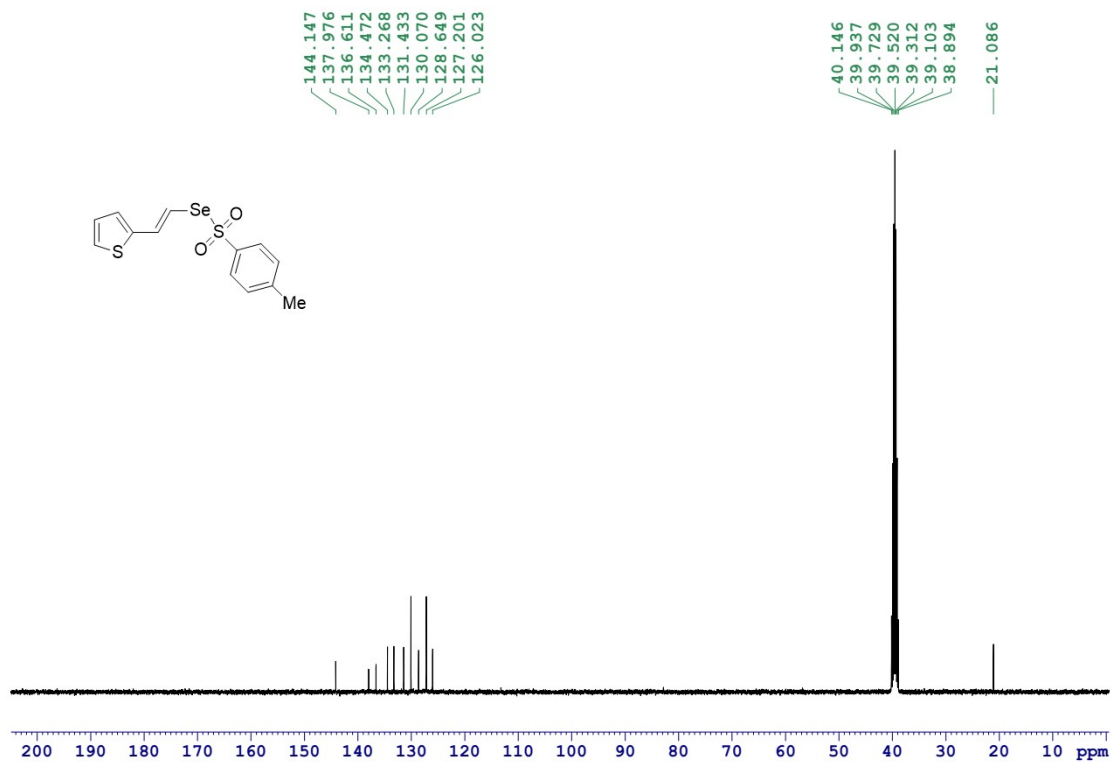

**3am- $^{13}\text{C}$  NMR (100 MHz, DMSO- $d_6$ )**

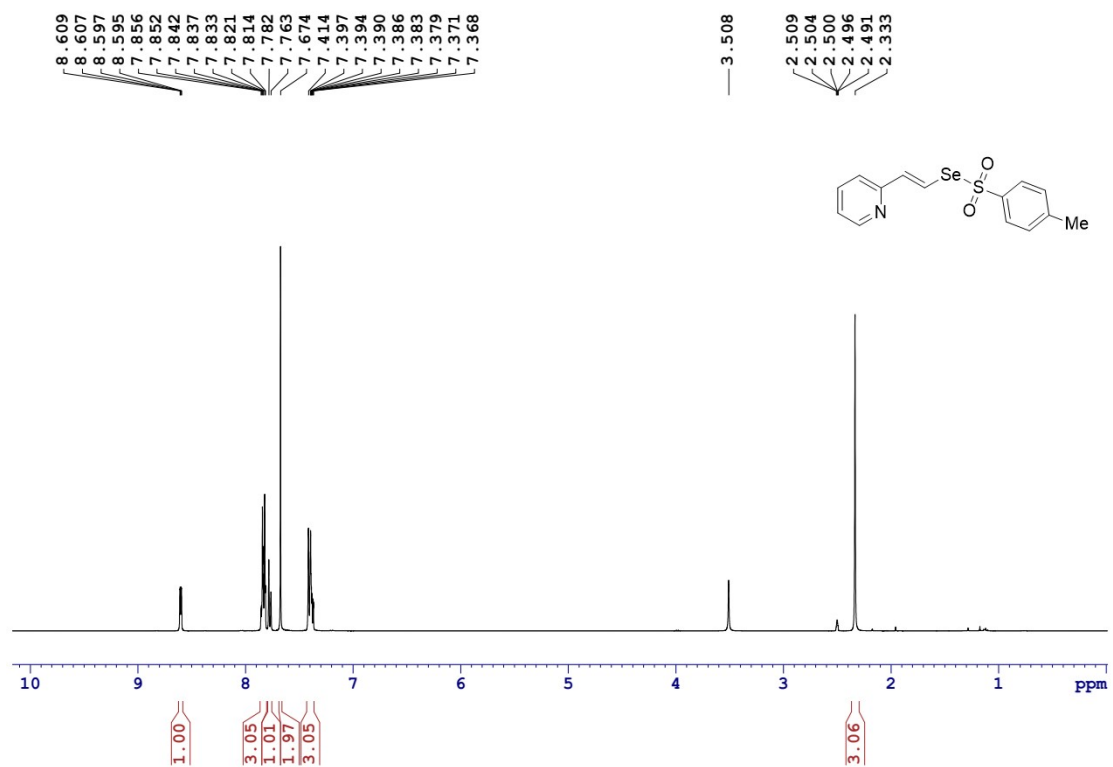

**3am- $^1\text{H}$  NMR (400 MHz, DMSO- $d_6$ )**

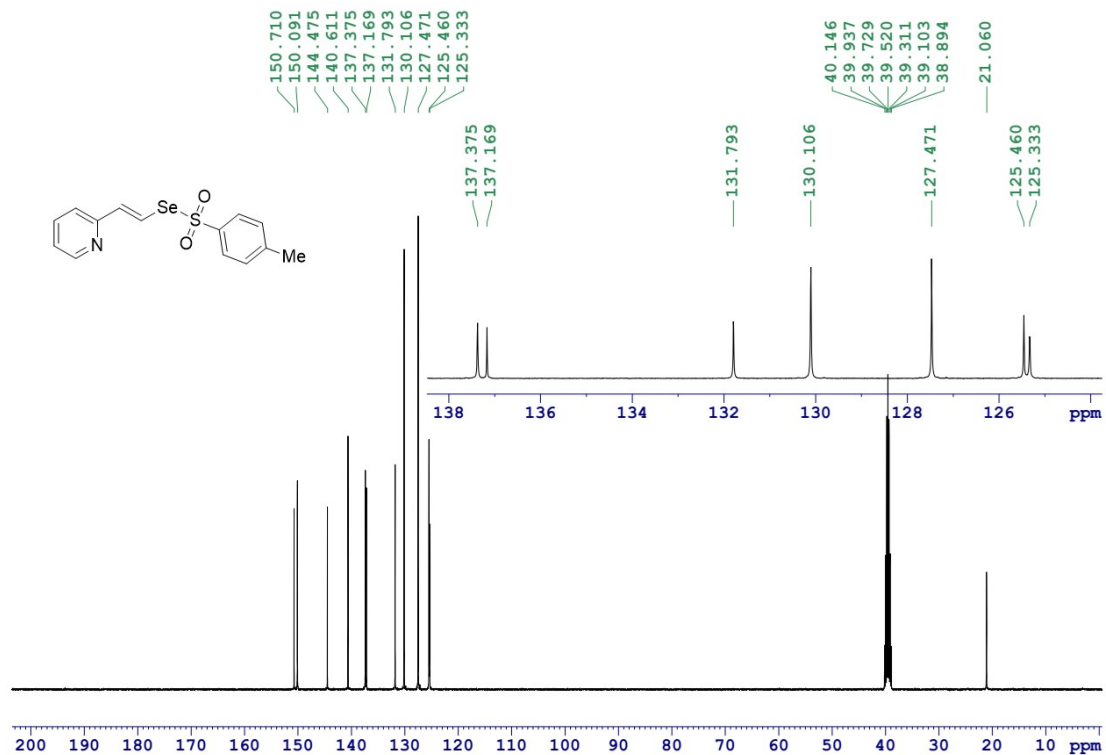

3an- $^{13}\text{C}$  NMR (100 MHz, DMSO- $d_6$ )

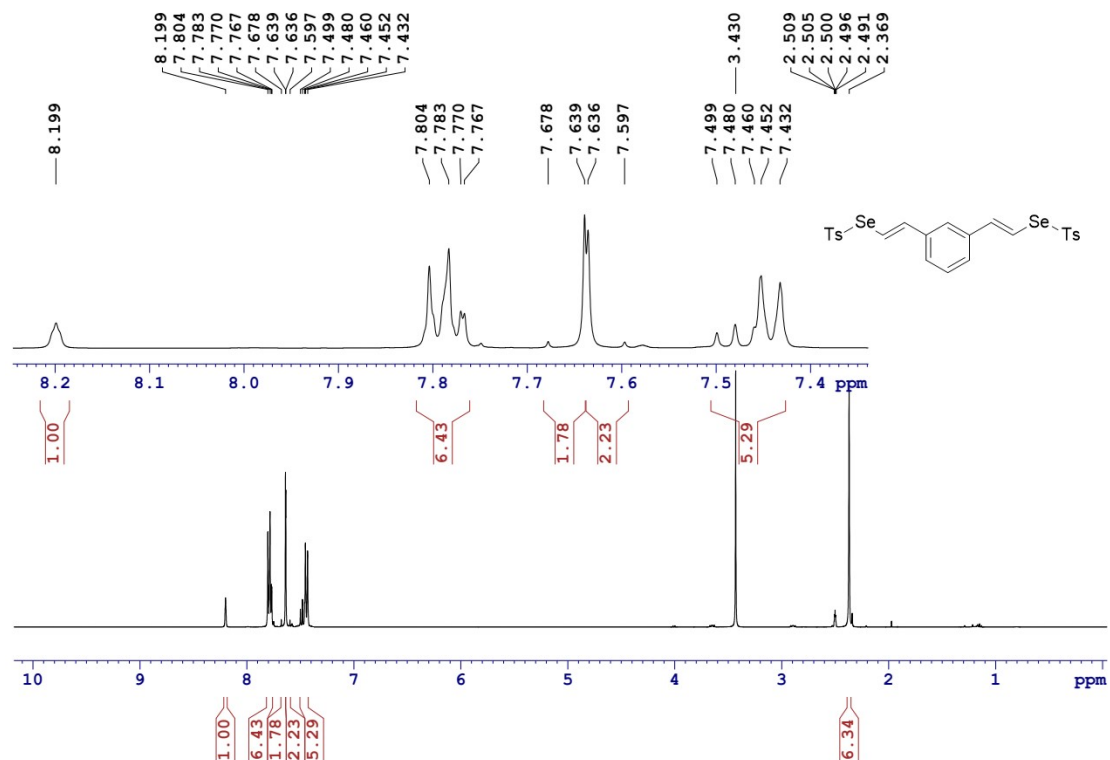

3ao- $^1\text{H}$  NMR (400 MHz, DMSO- $d_6$ )

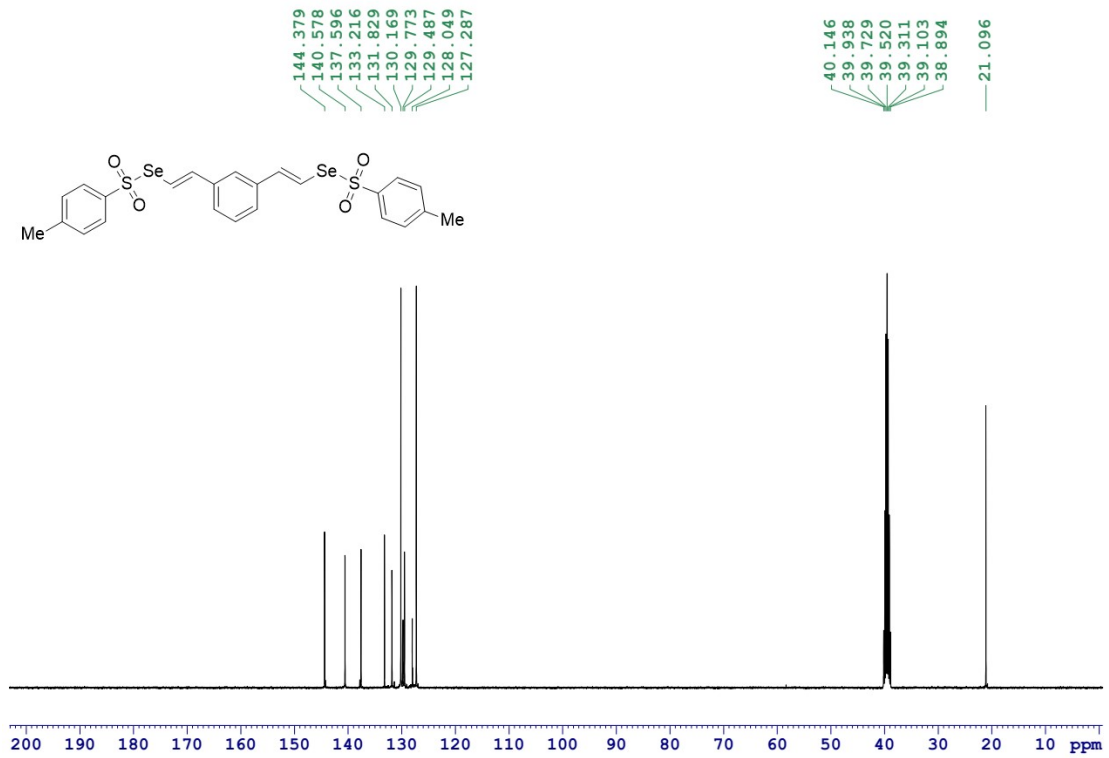

**3ao**- $^{13}\text{C}$  NMR (100 MHz,  $\text{DMSO}-d_6$ )

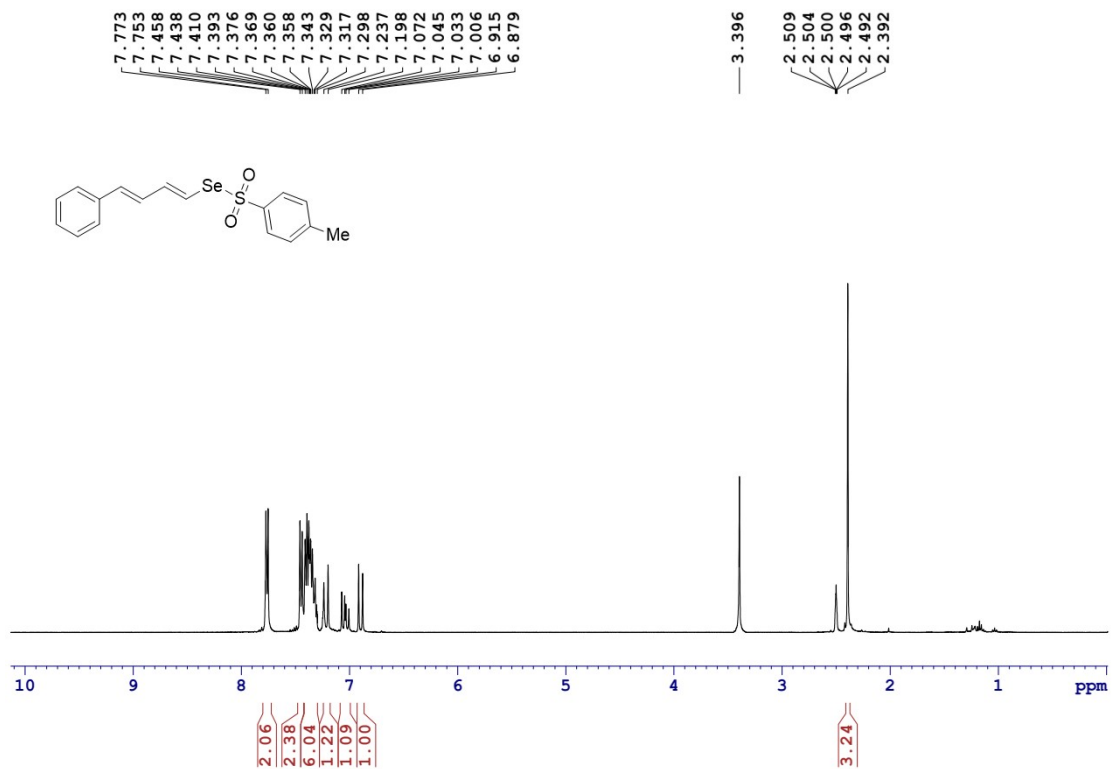

**3ap**- $^1\text{H}$  NMR (400 MHz,  $\text{DMSO}-d_6$ )

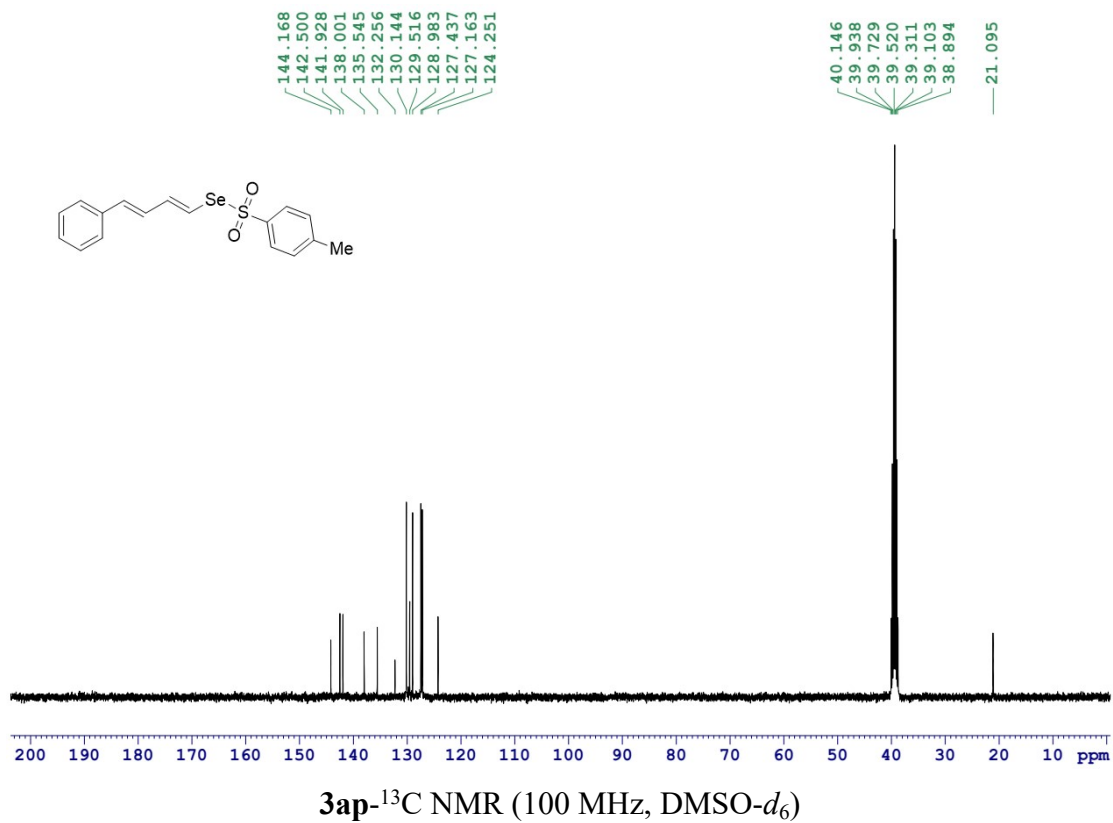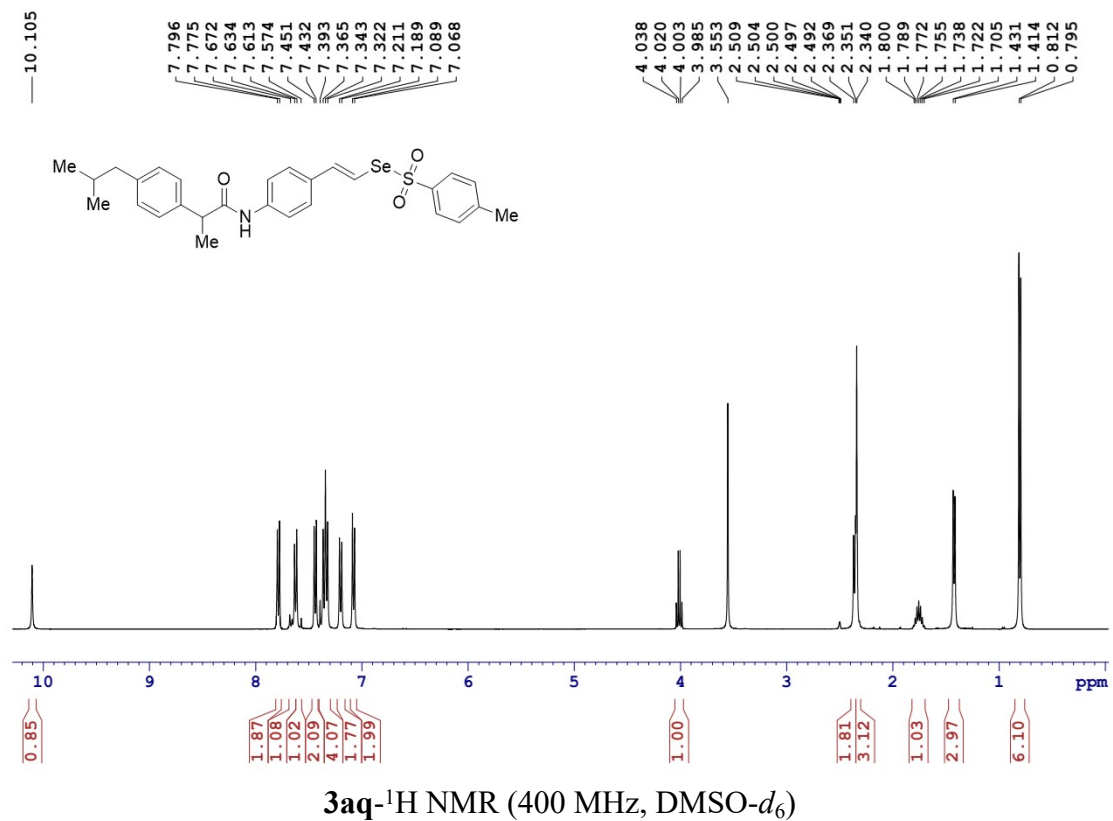



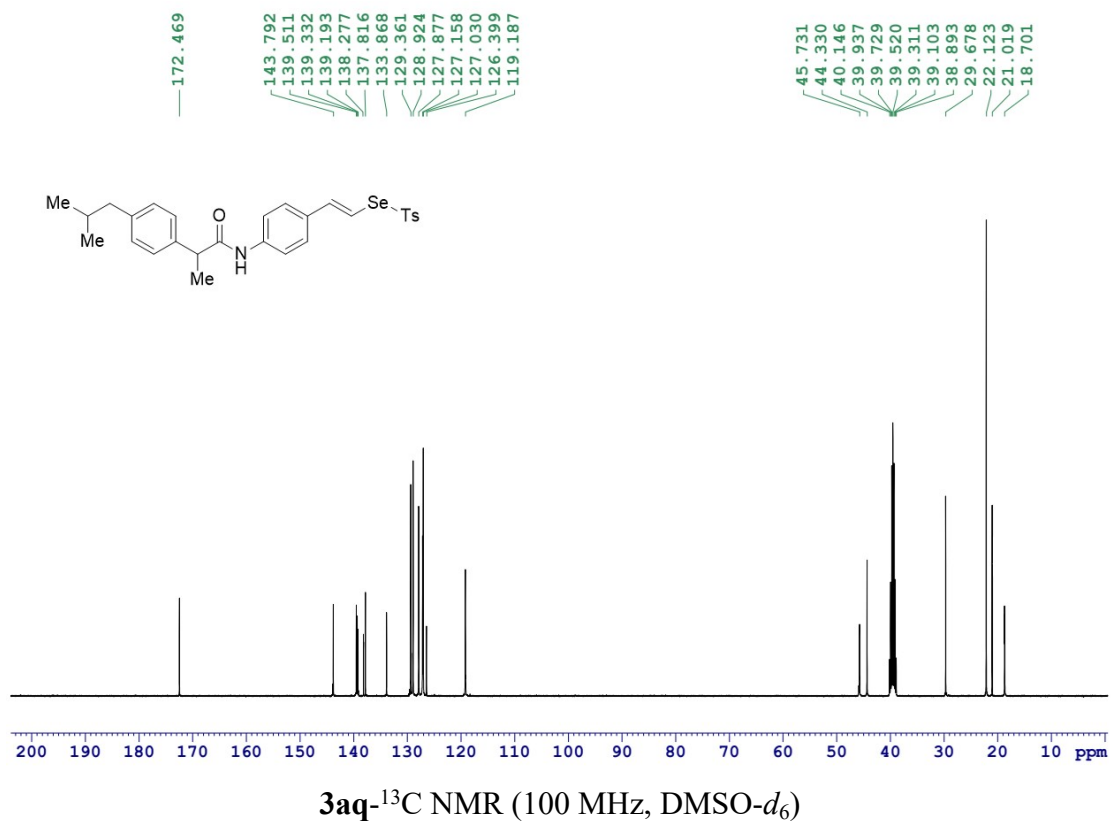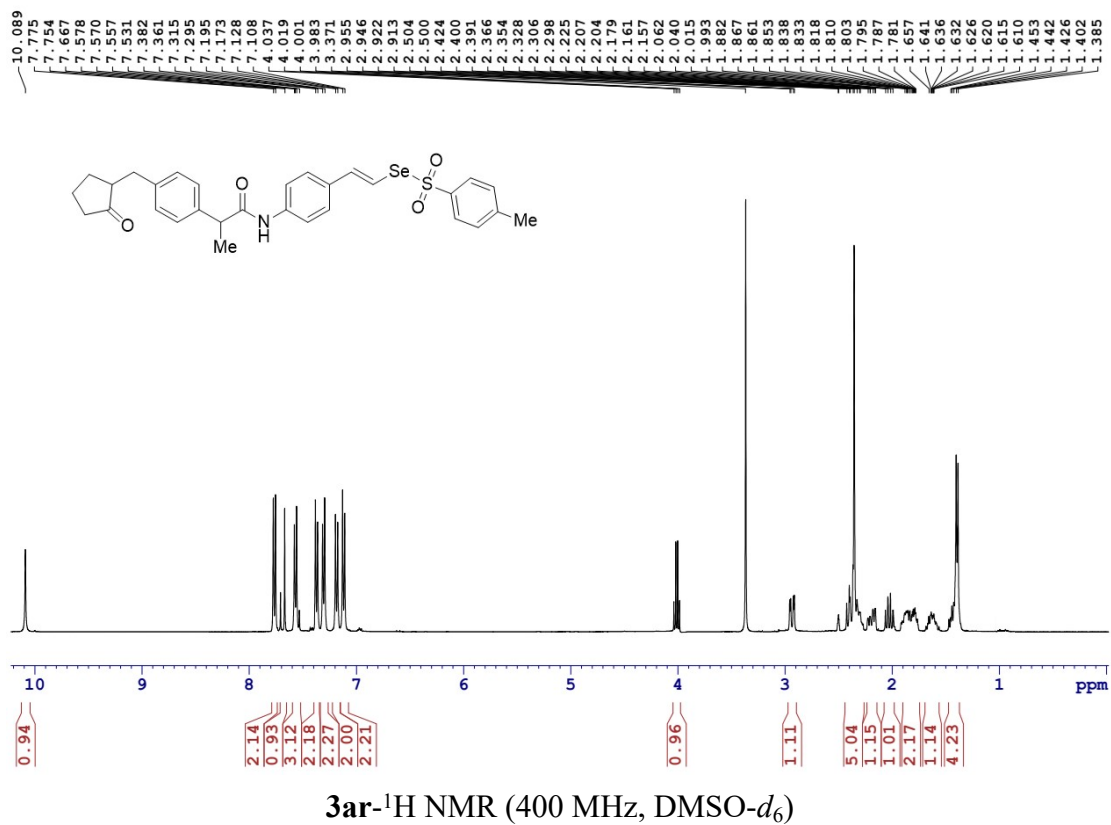

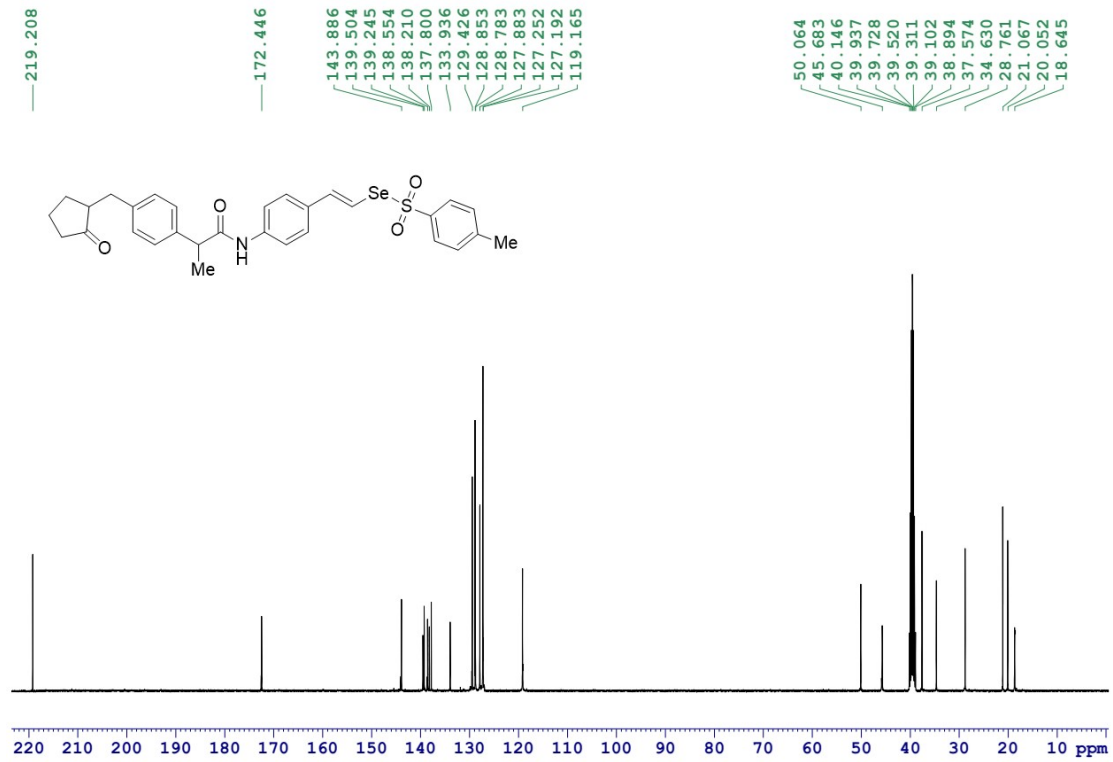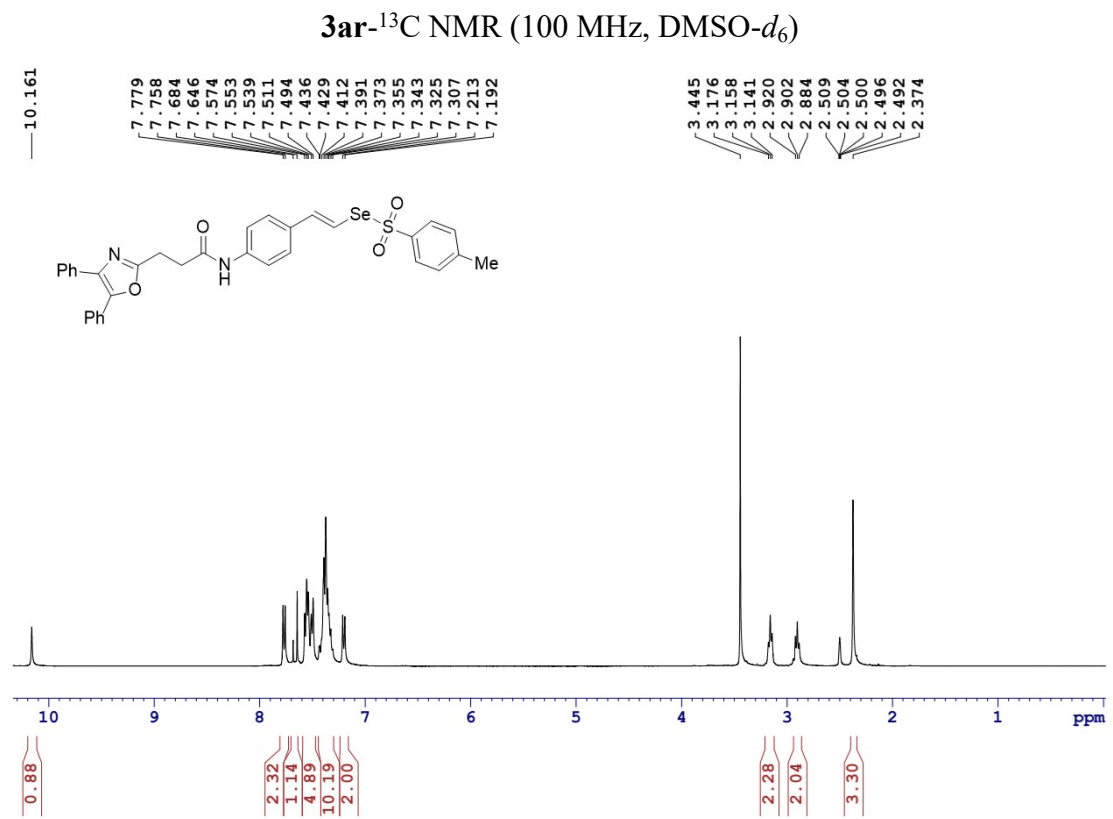

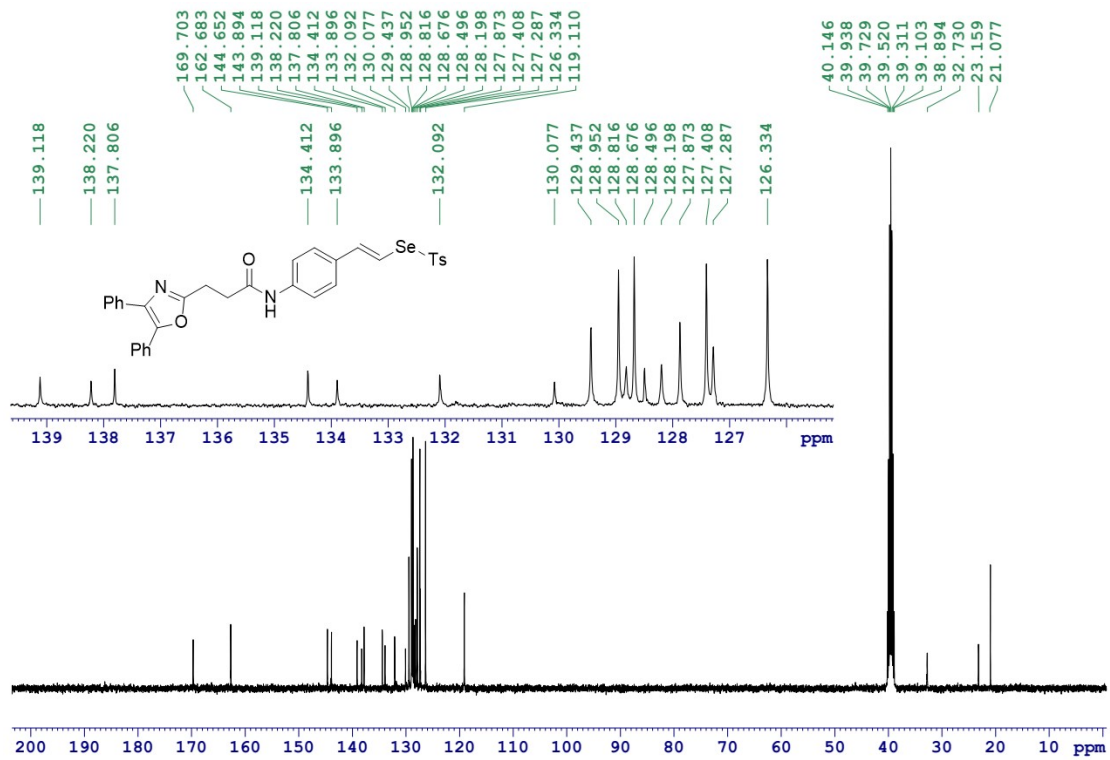

**3as**- $^{13}\text{C}$  NMR (100 MHz, DMSO- $d_6$ )

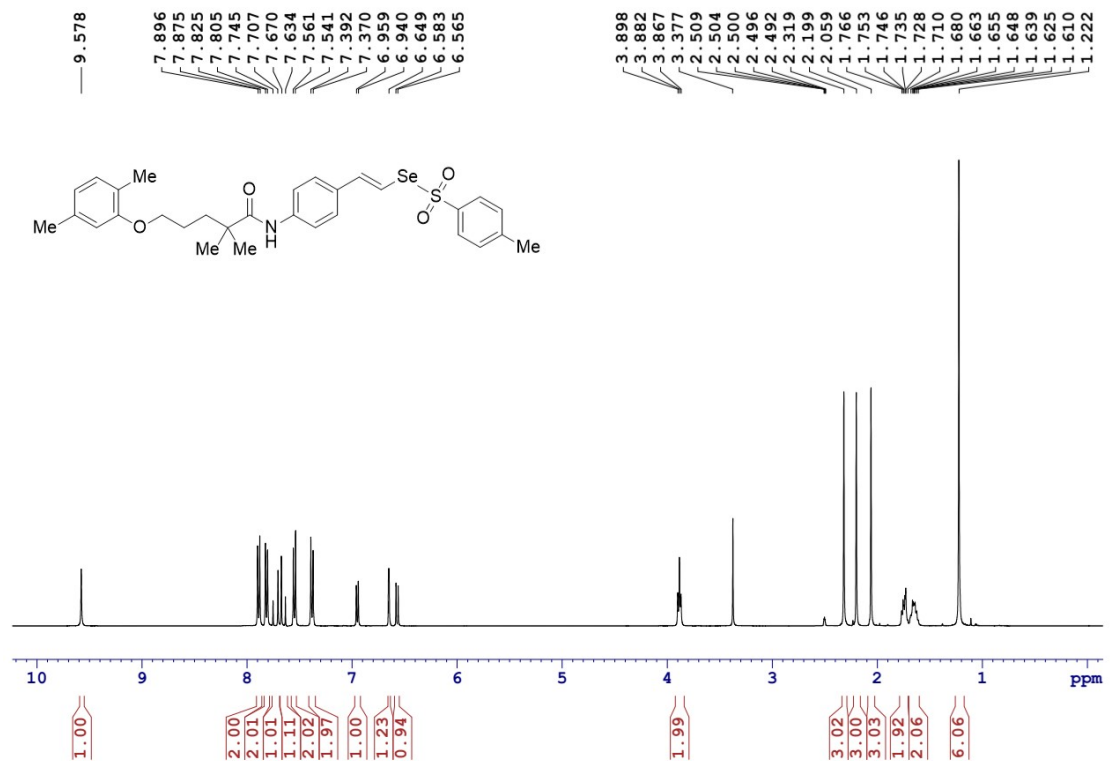

**3at**- $^1\text{H}$  NMR (400 MHz, DMSO- $d_6$ )

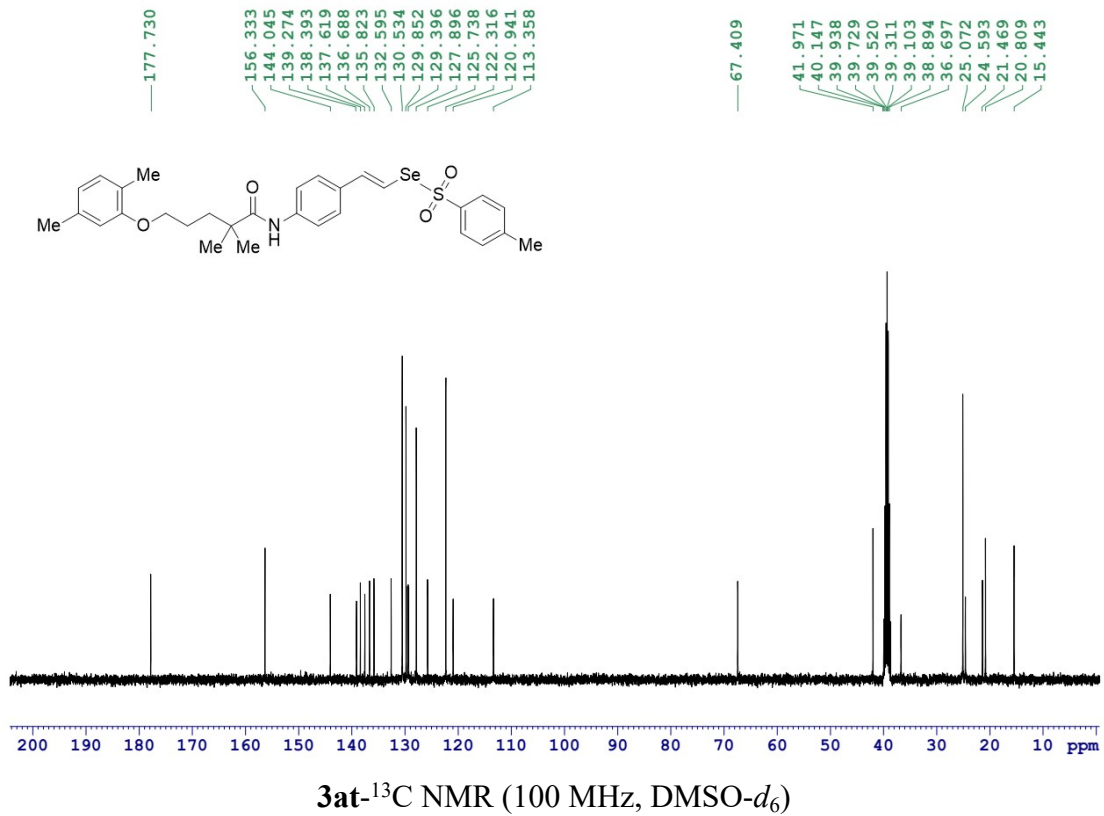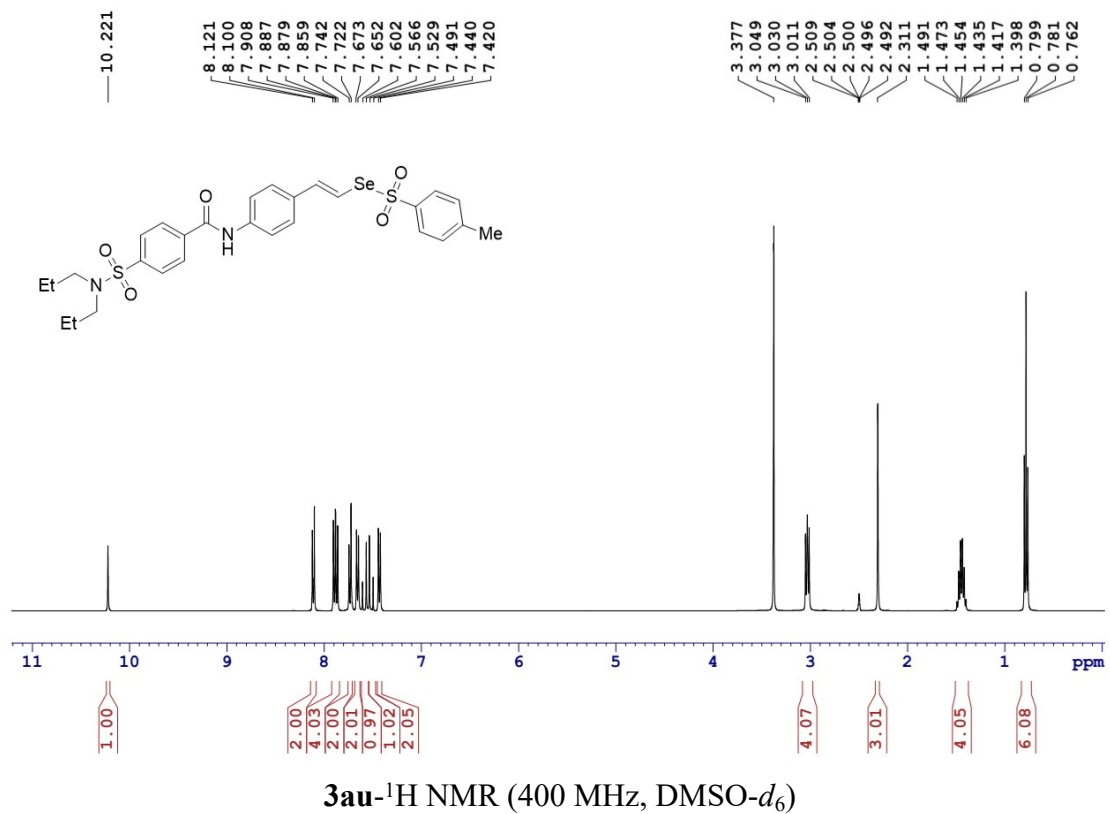

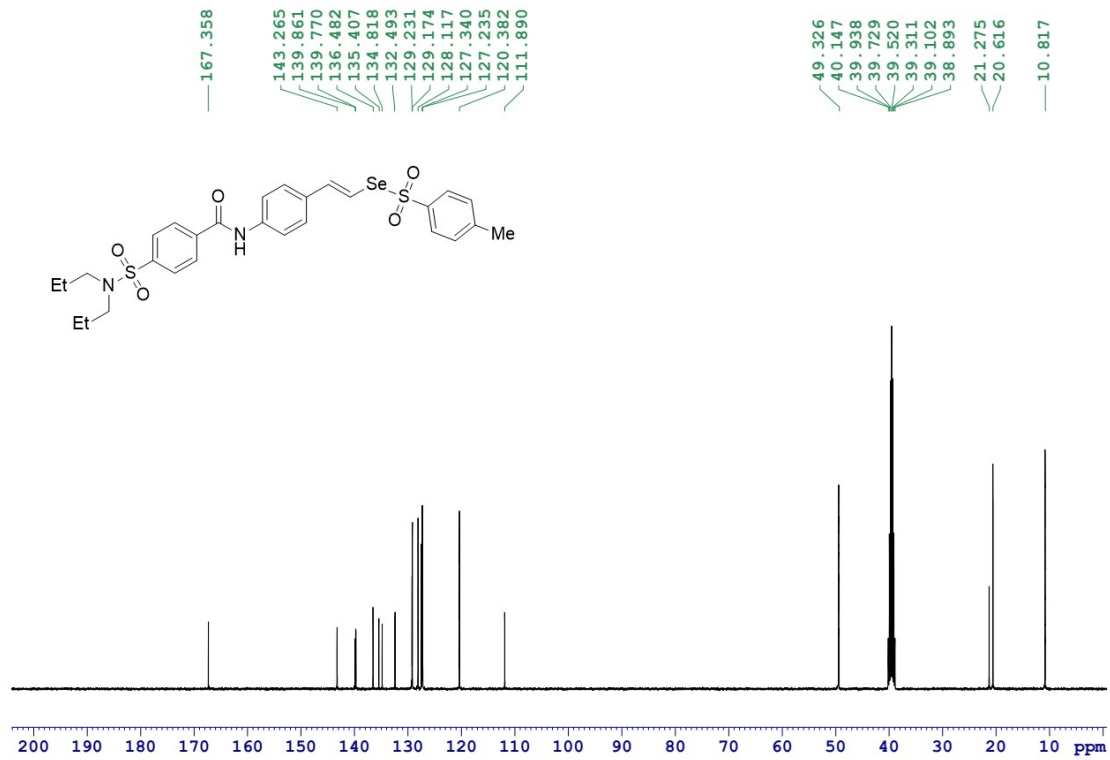

**3au**- $^{13}\text{C}$  NMR (100 MHz,  $\text{DMSO-}d_6$ )

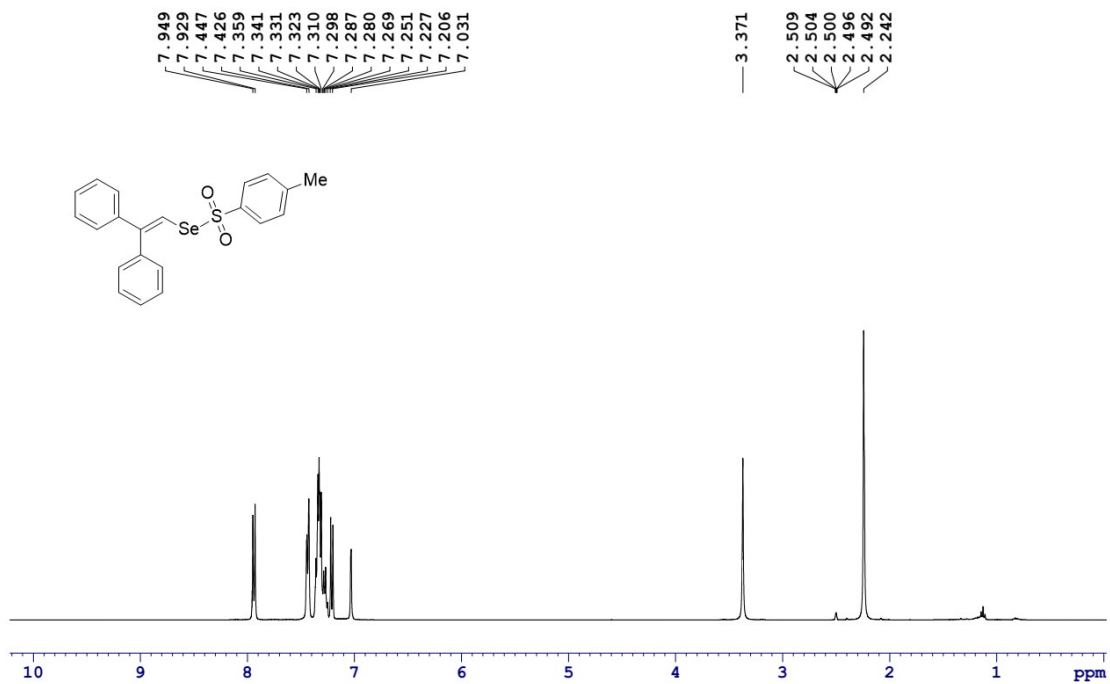

**3av**- $^1\text{H}$  NMR (400 MHz,  $\text{DMSO-}d_6$ )

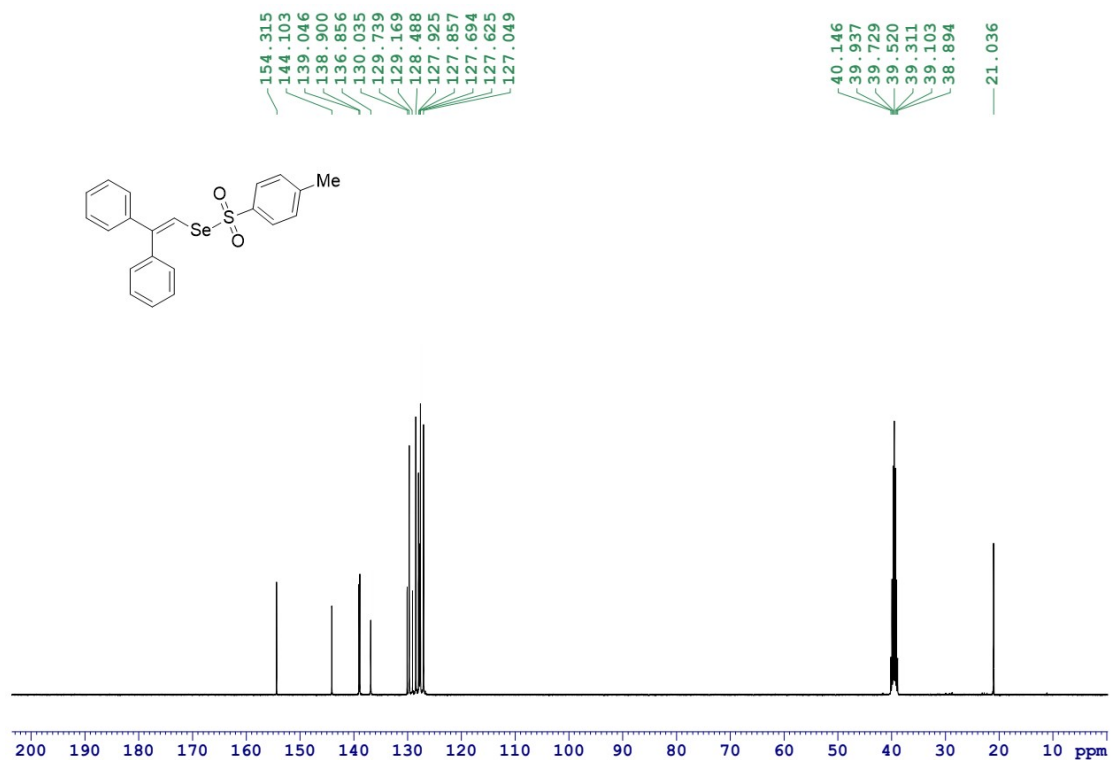

**3av**- $^{13}\text{C}$  NMR (100 MHz,  $\text{DMSO-}d_6$ )

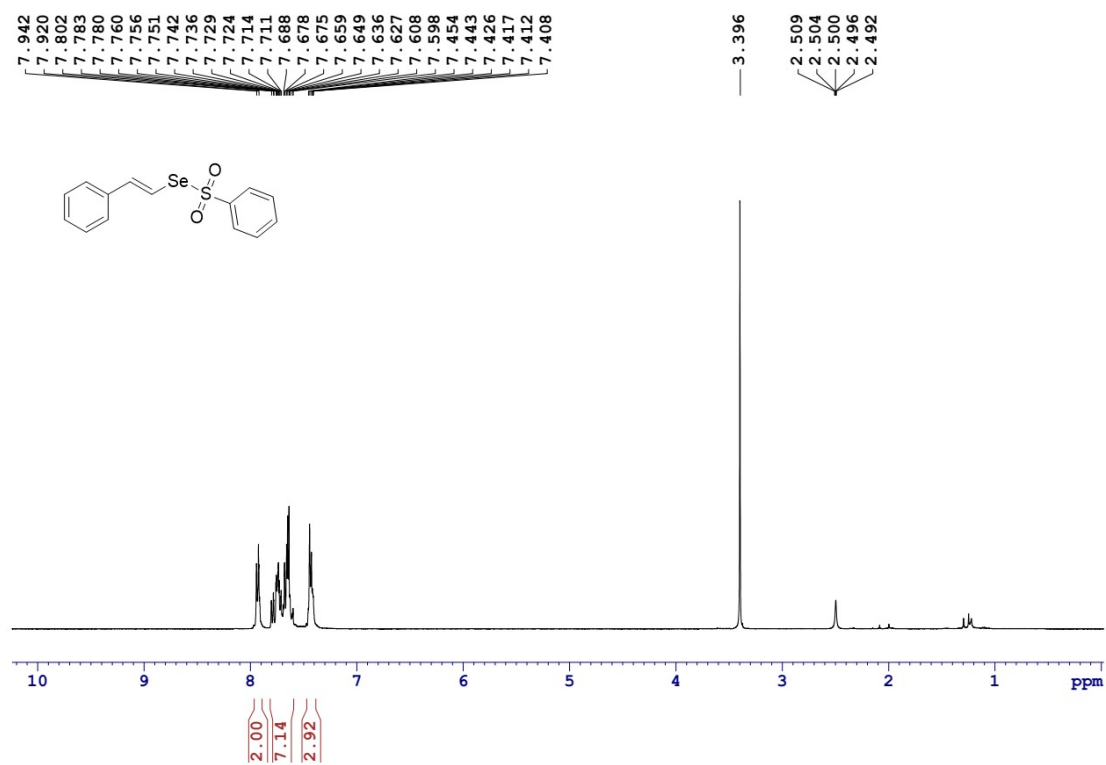

**3ba**- $^1\text{H}$  NMR (400 MHz,  $\text{DMSO-}d_6$ )

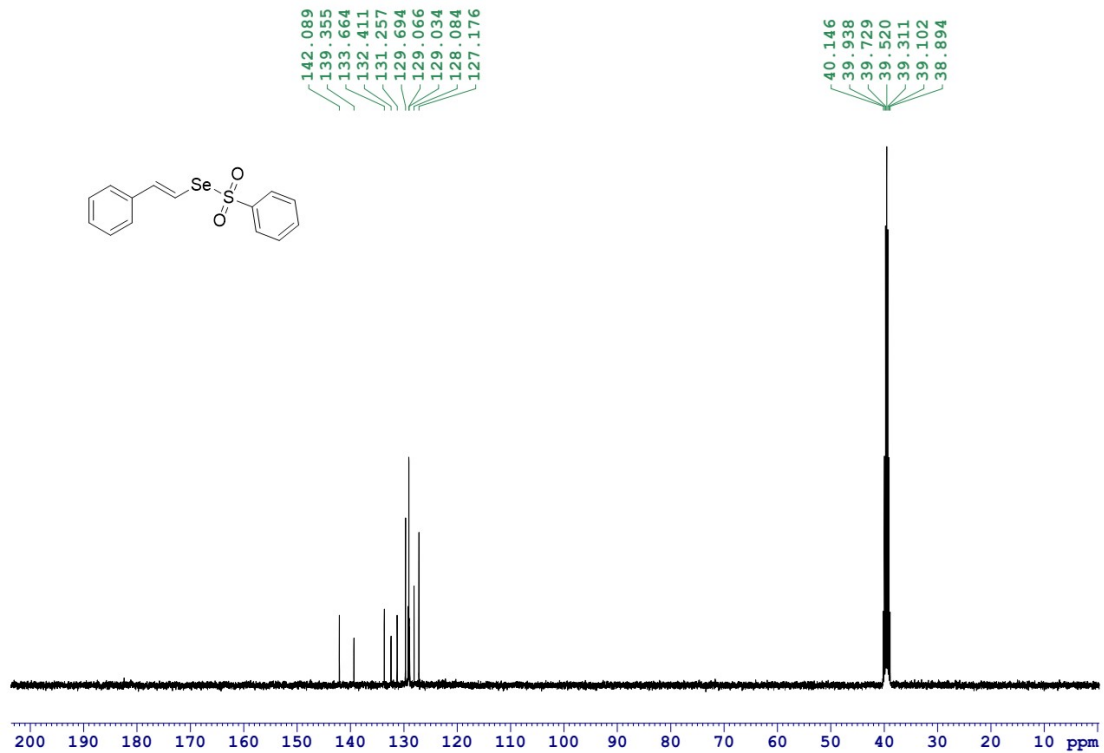

3a- $^{13}\text{C}$  NMR (100 MHz, DMSO- $d_6$ )

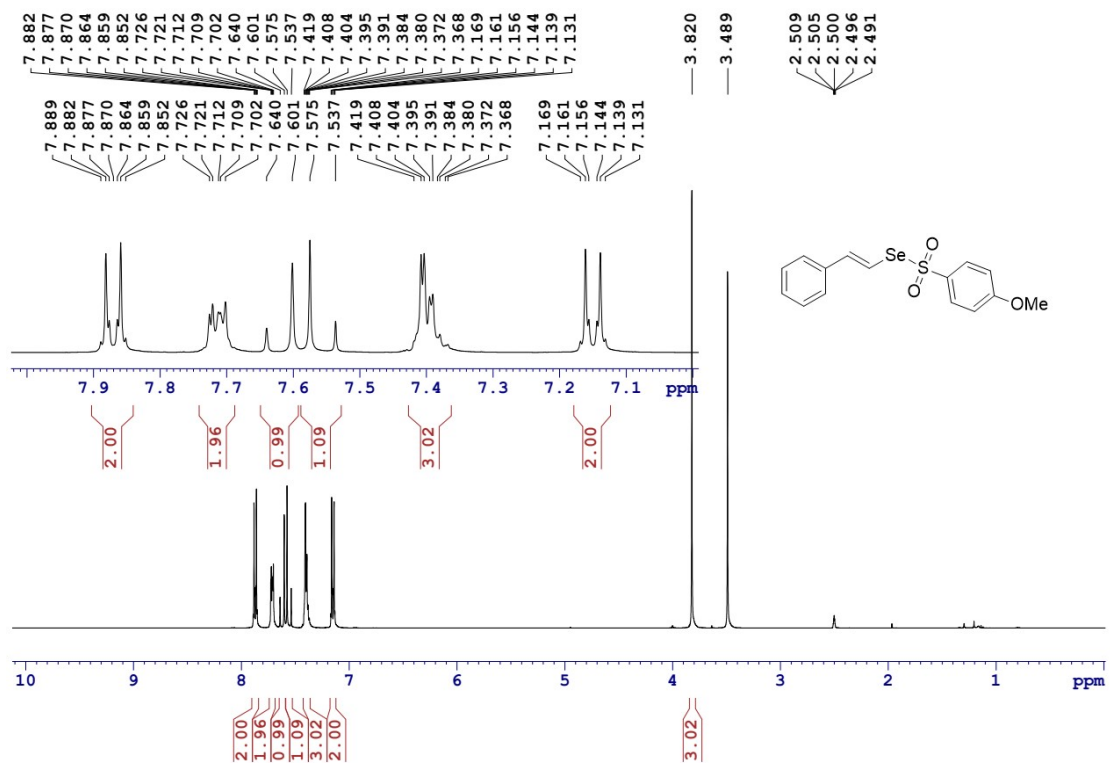

3a- $^1\text{H}$  NMR (400 MHz, DMSO- $d_6$ )

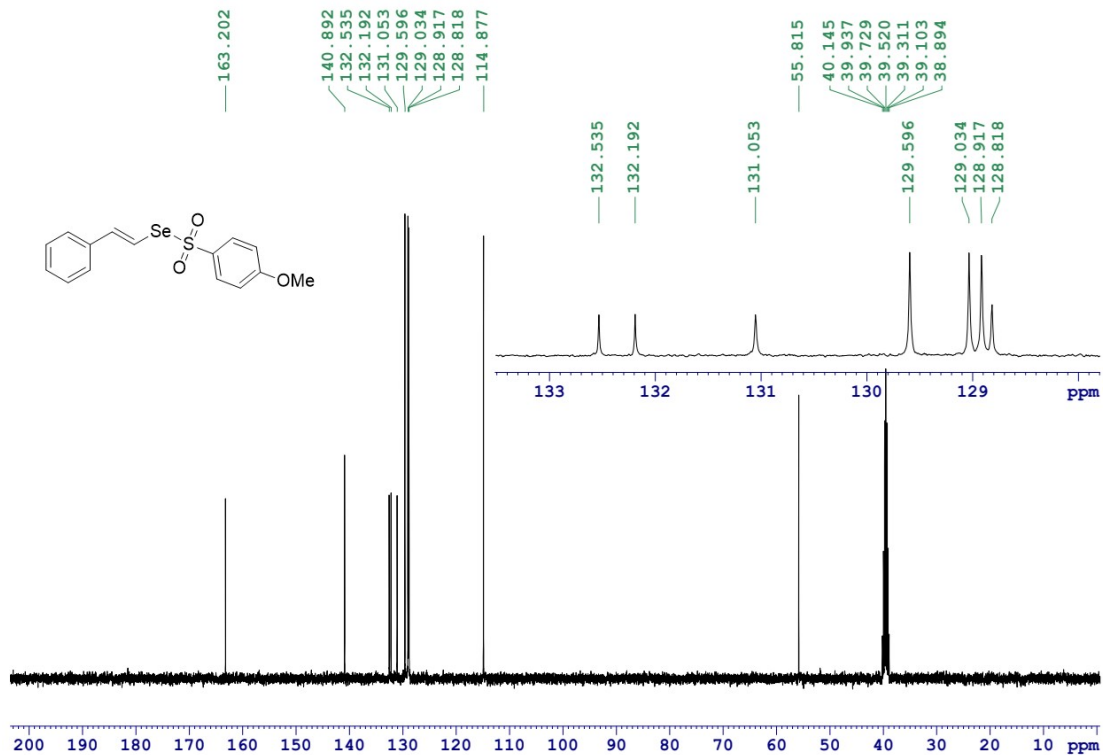

**3a**- $^{13}\text{C}$  NMR (100 MHz,  $\text{DMSO}-d_6$ )

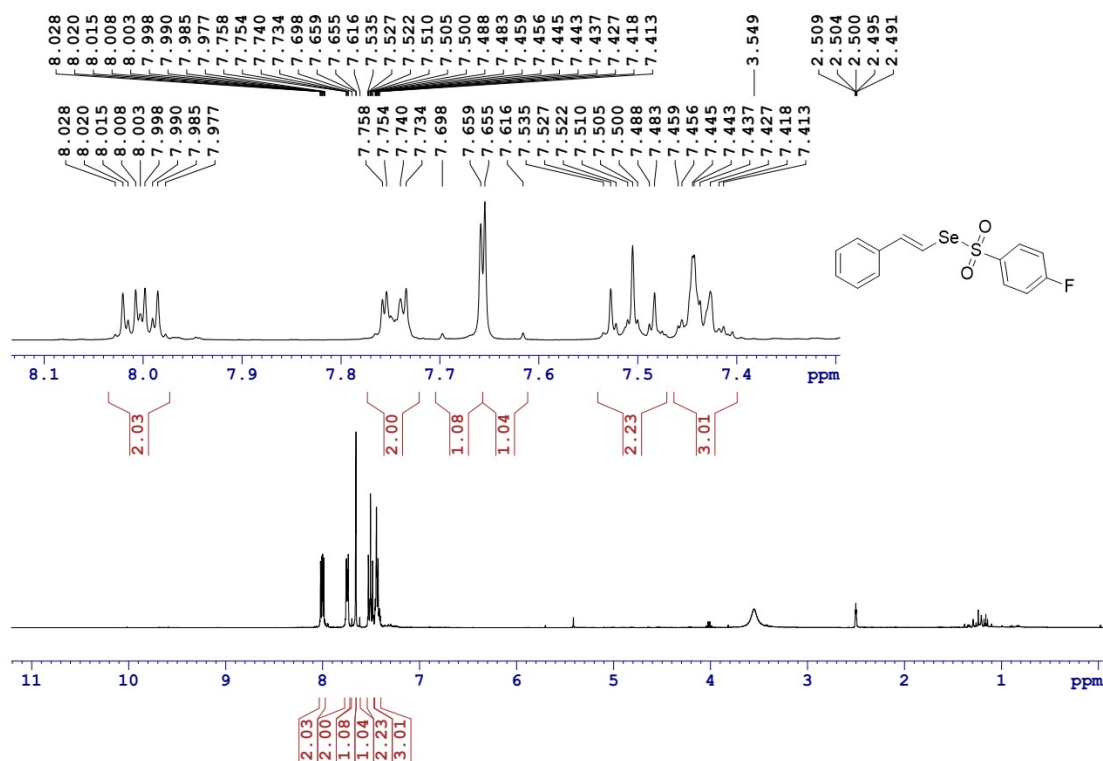

**3a**- $^1\text{H}$  NMR (400 MHz,  $\text{DMSO}-d_6$ )



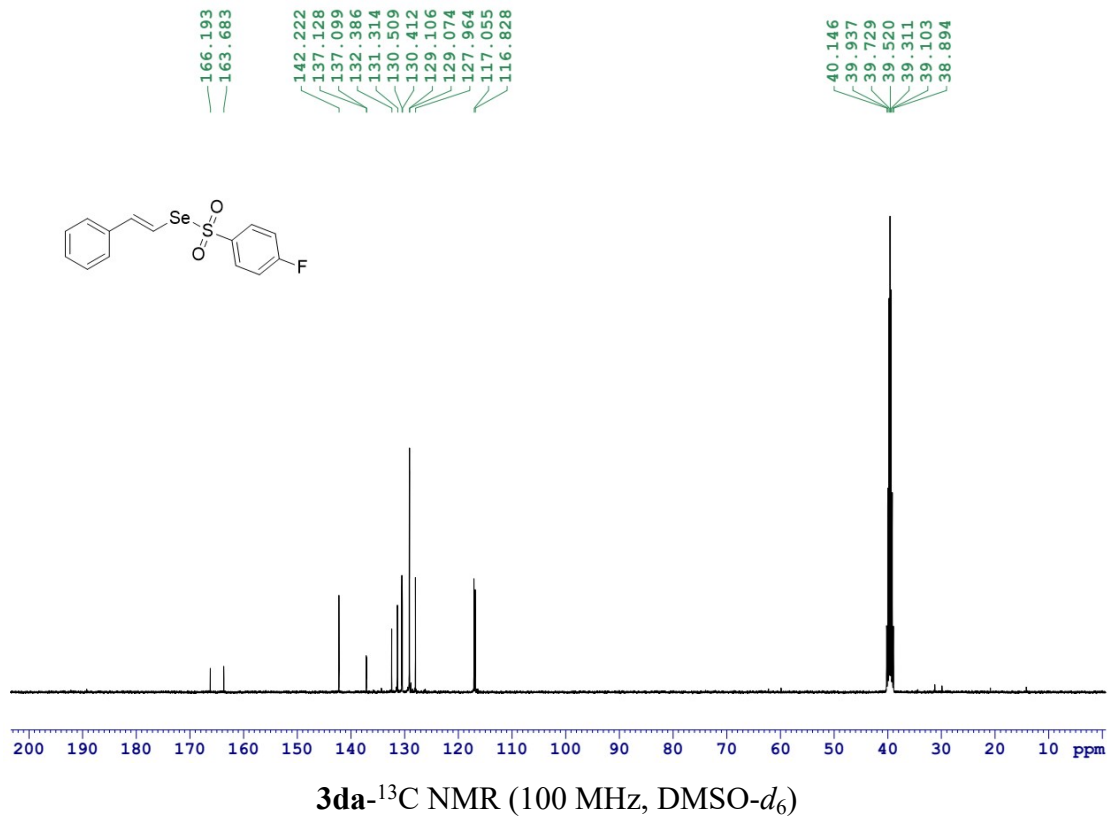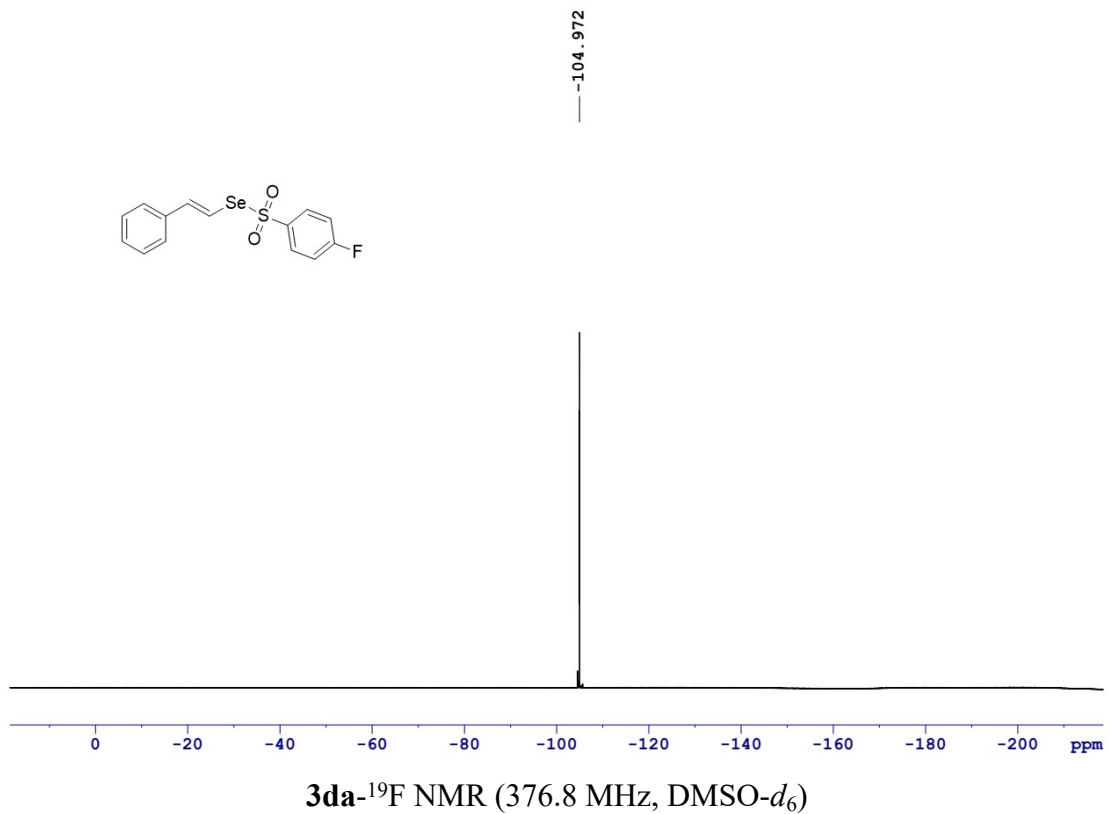

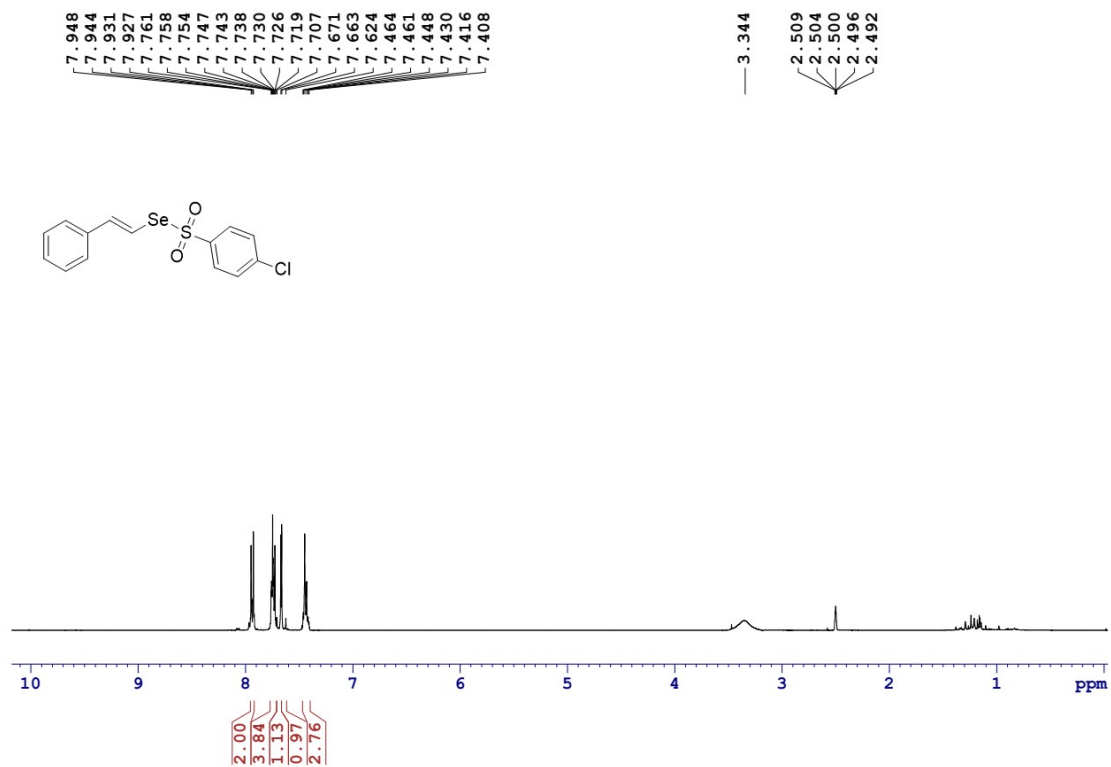

**3ea-<sup>1</sup>H NMR (400 MHz, DMSO-*d*<sub>6</sub>)**

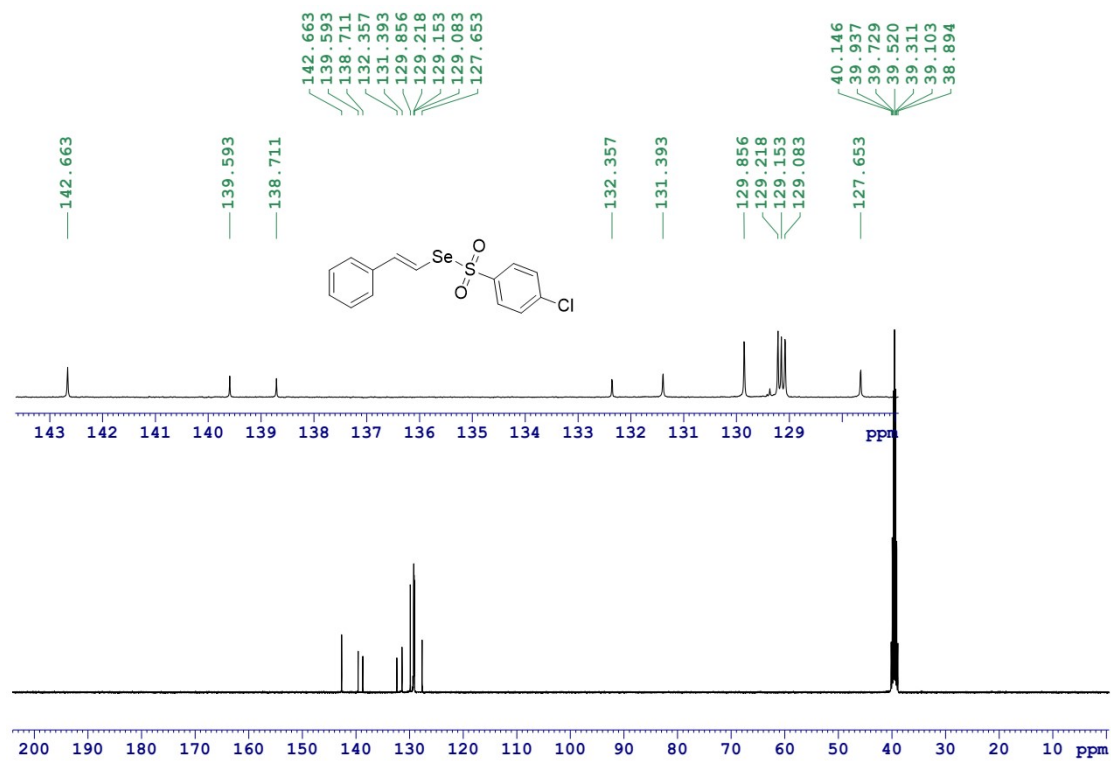

**3ea-<sup>13</sup>C NMR (100 MHz, DMSO-*d*<sub>6</sub>)**

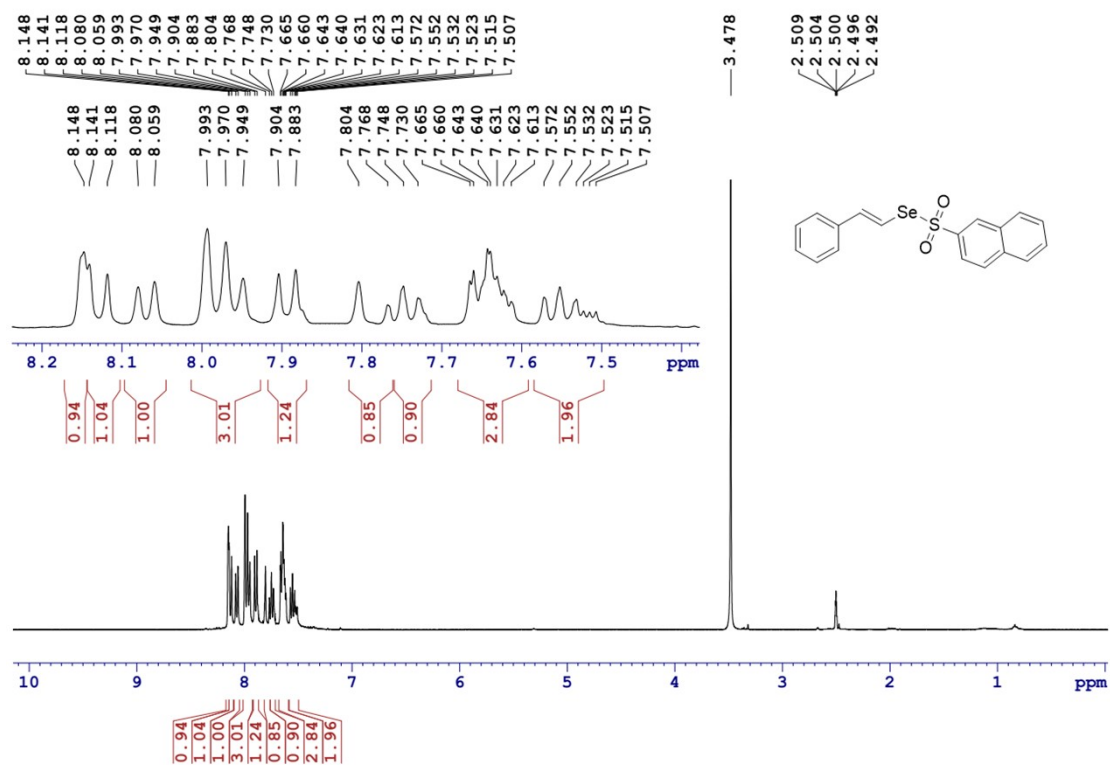

**$3\text{fa-}^1\text{H}$  NMR (400 MHz,  $\text{DMSO-}d_6$ )**

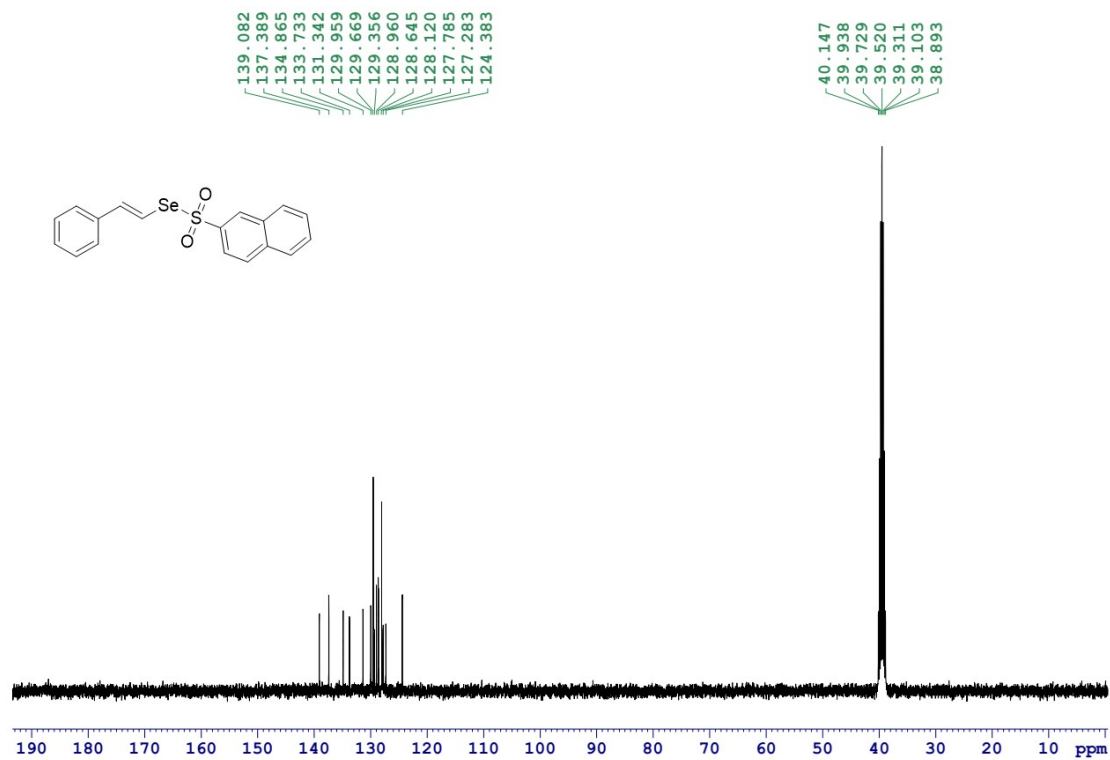

**$3\text{fa-}^{13}\text{C}$  NMR (100 MHz,  $\text{DMSO-}d_6$ )**

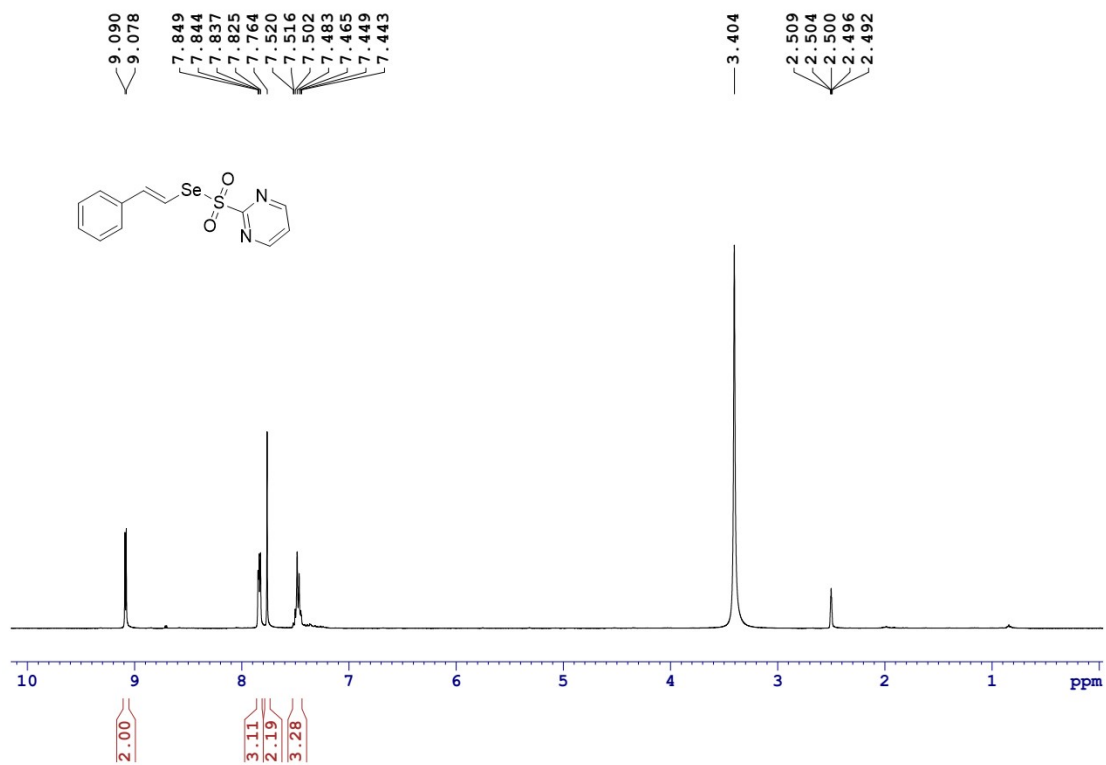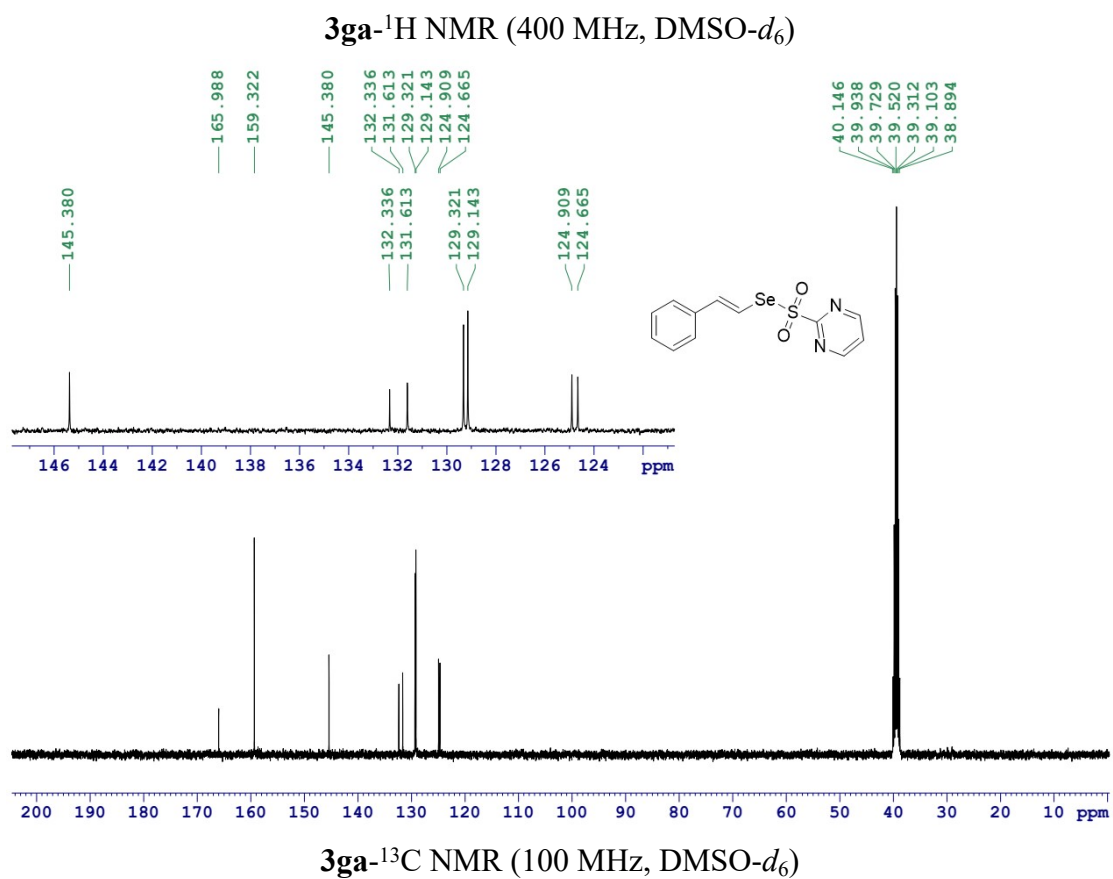

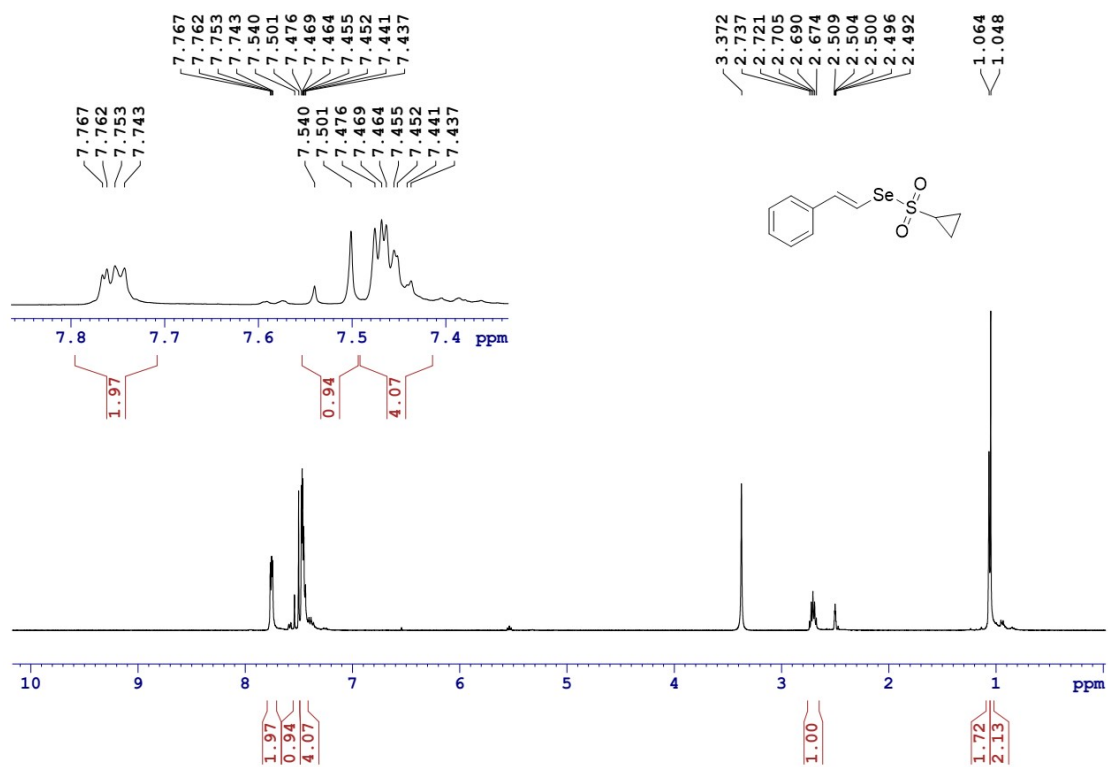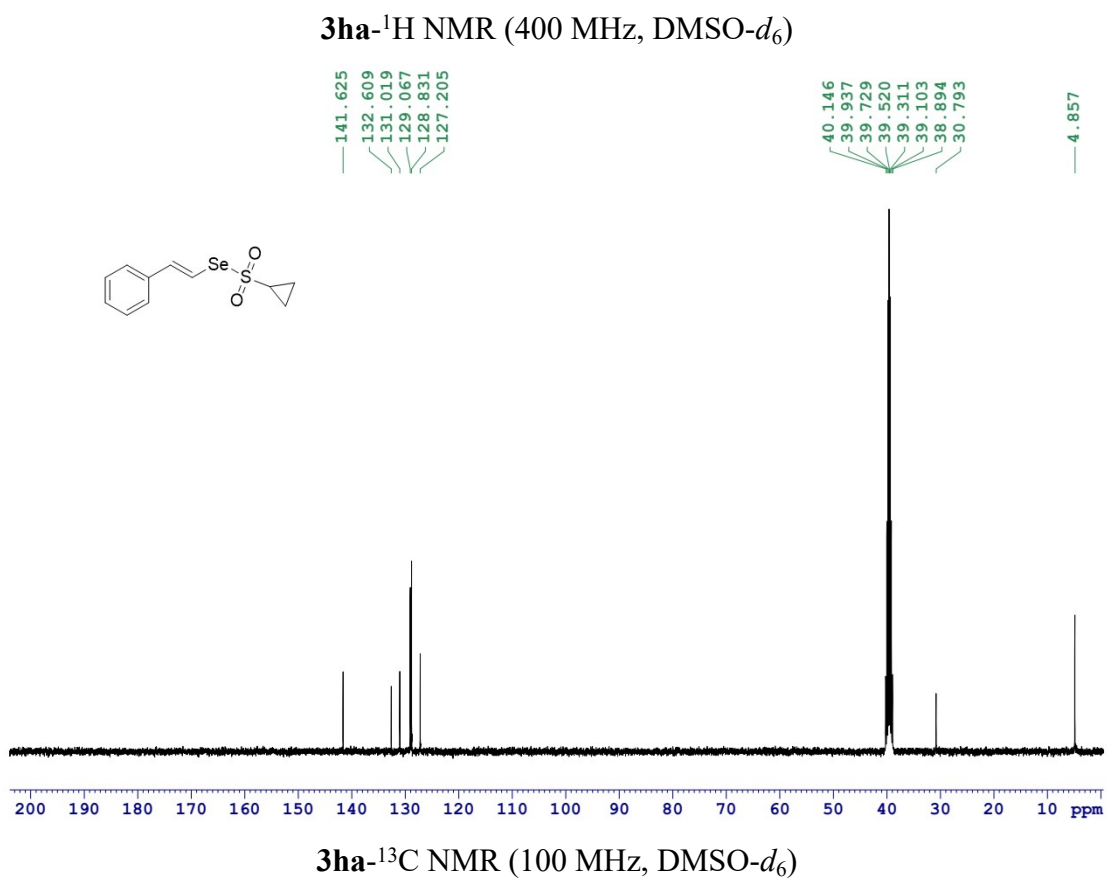

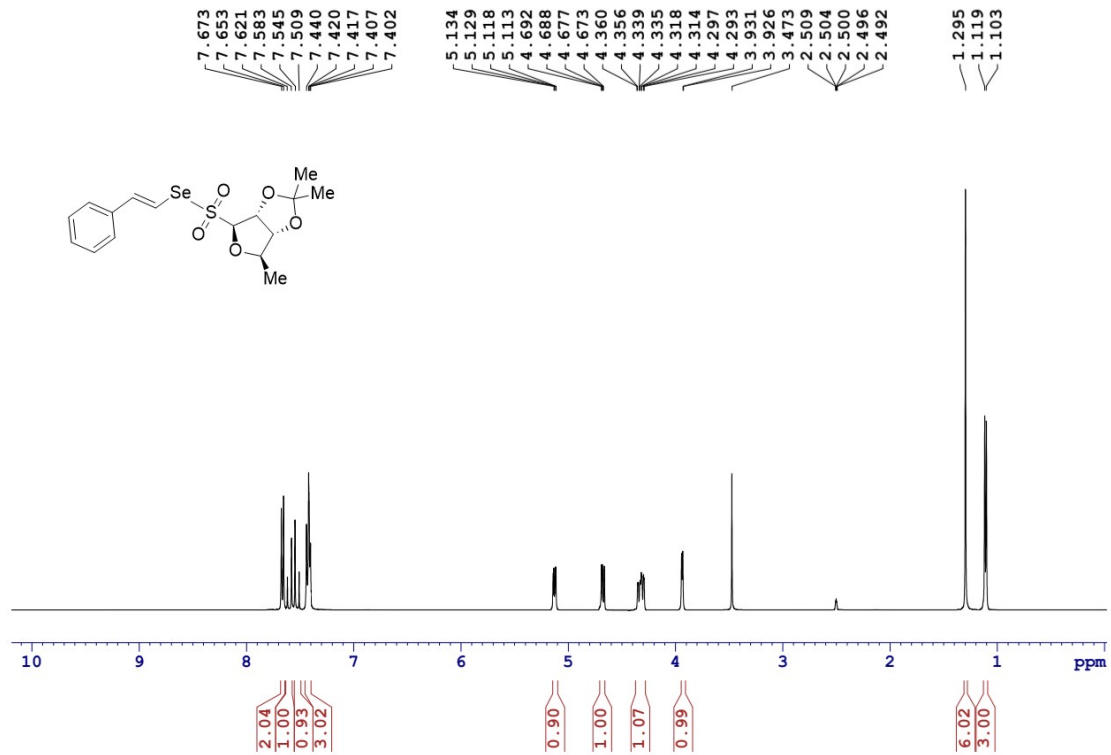

**3ia**-<sup>1</sup>H NMR (400 MHz, DMSO-*d*<sub>6</sub>)

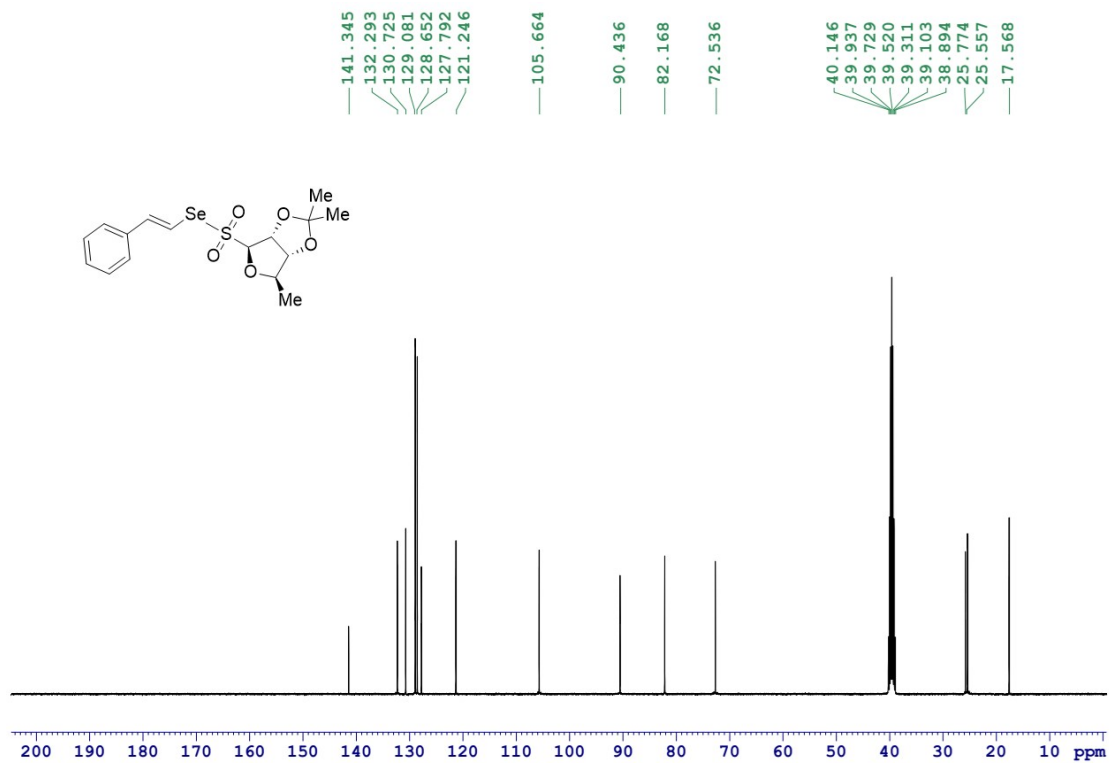

**3ia**-<sup>13</sup>C NMR (100 MHz, DMSO-*d*<sub>6</sub>)

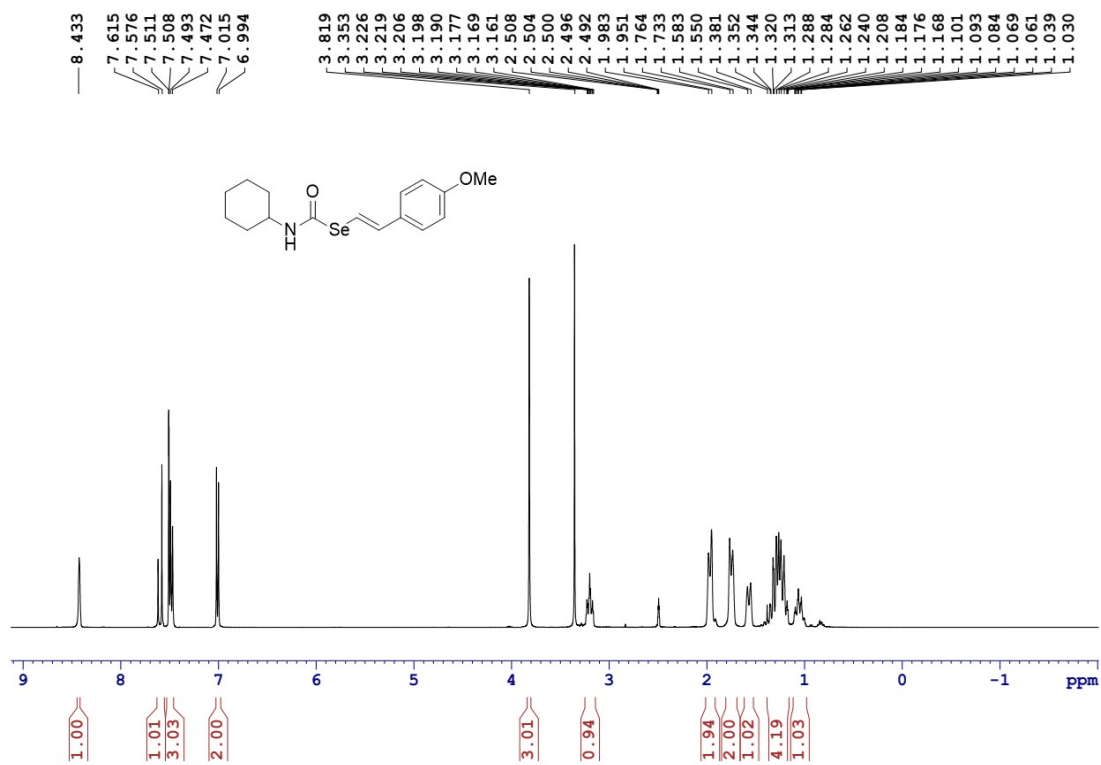

**4aa- $^1\text{H NMR}$  (400 MHz,  $\text{DMSO-}d_6$ )**

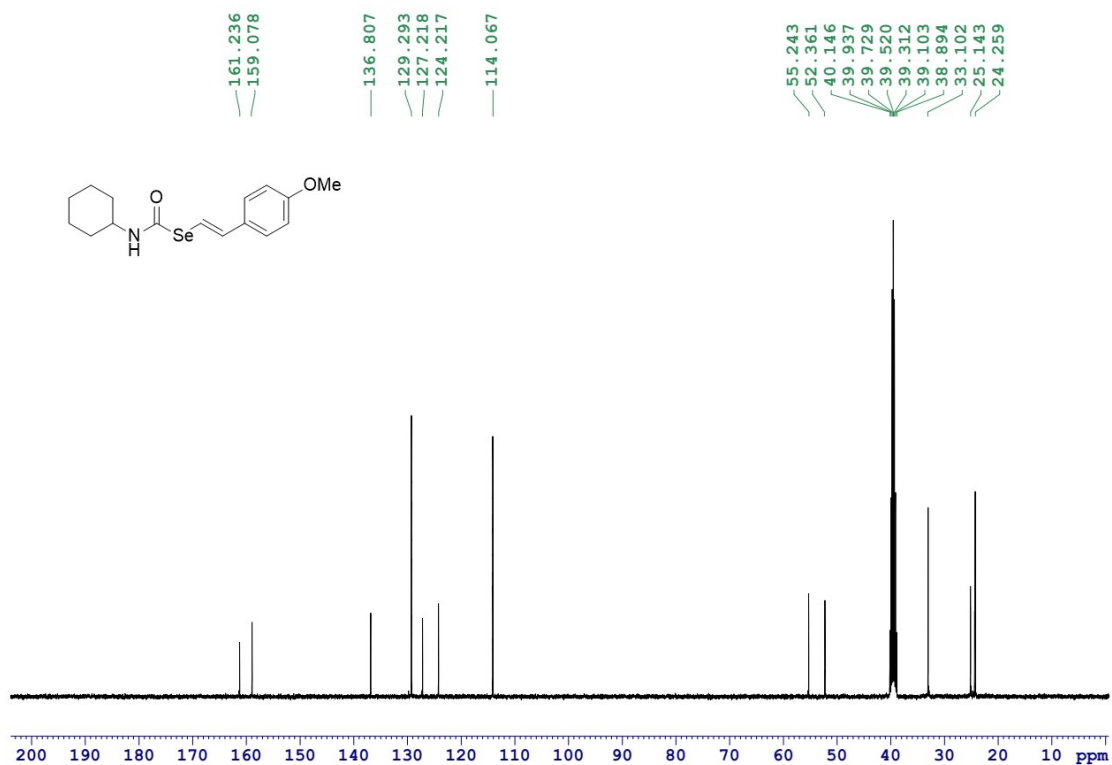

**4aa- $^{13}\text{C NMR}$  (100 MHz,  $\text{DMSO-}d_6$ )**

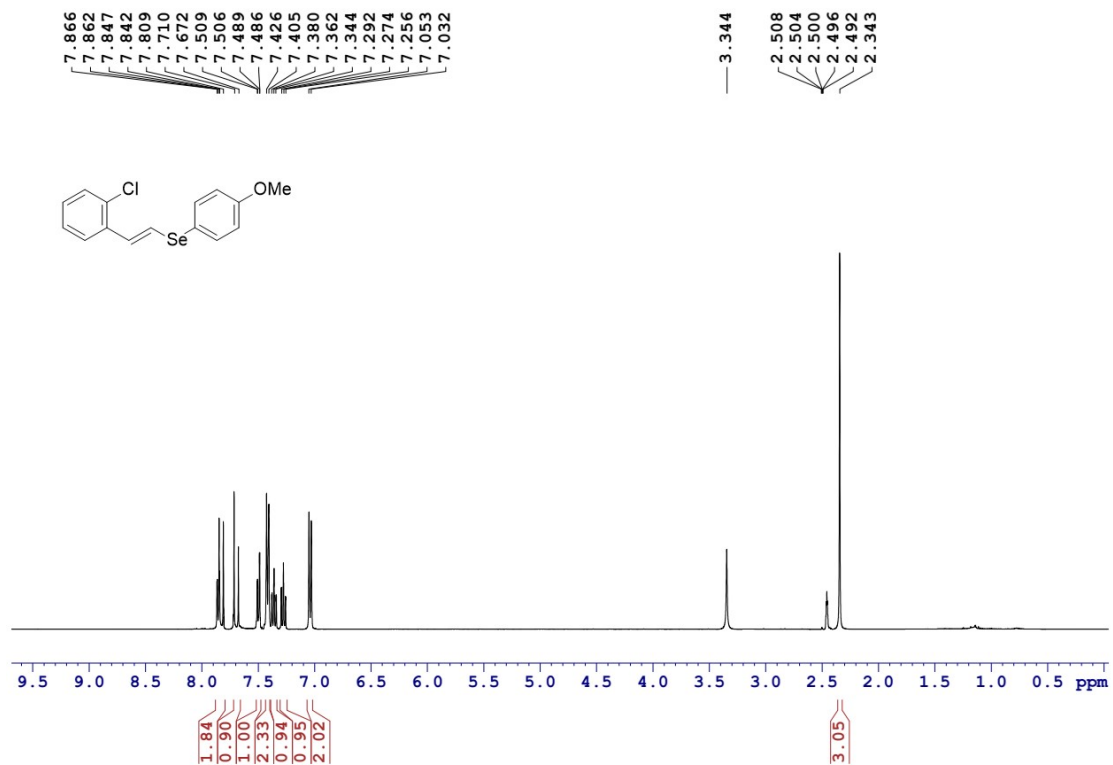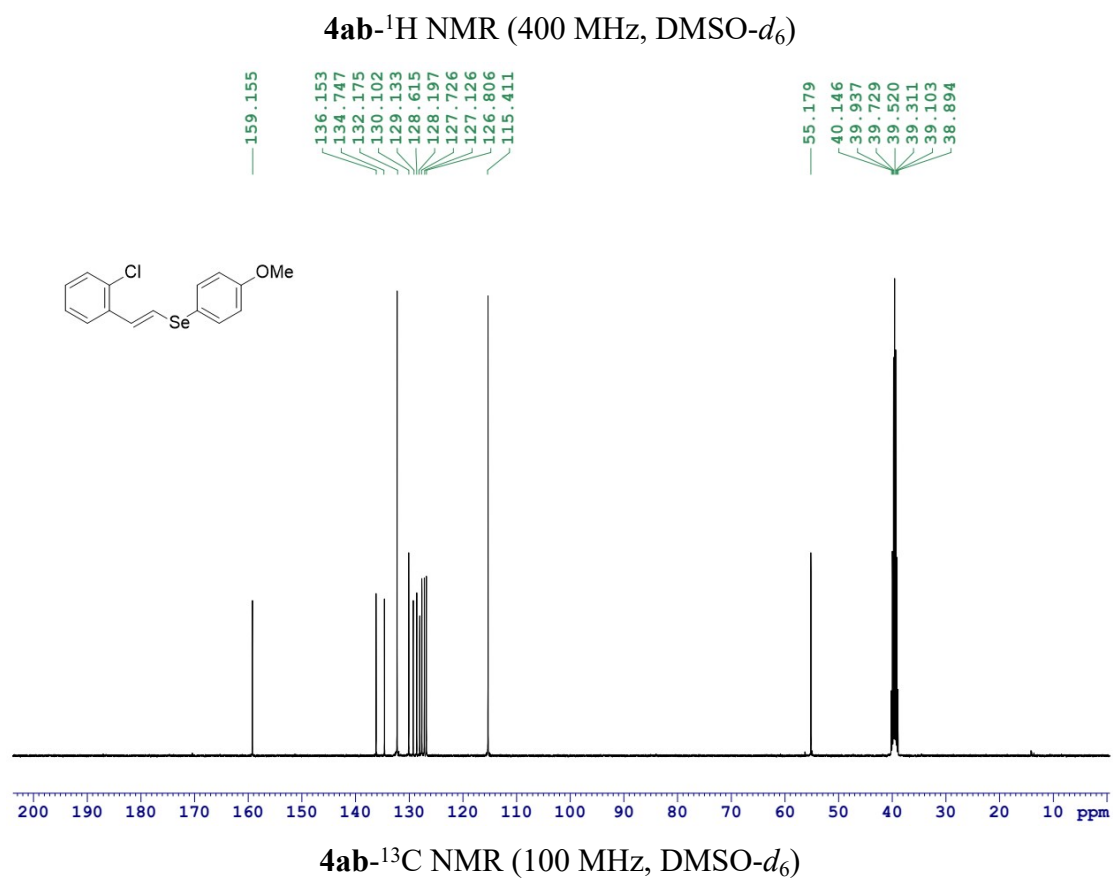

Supplement: d4cc06246a1.pdf [file d4cc06246a1.pdf]
